# Supplementary material for: Formulated hydroxy fatty acids from fruit pomaces reduce apple scab development caused by Venturia inaequalis through a dual mode of action
Source: Front Plant Sci. 2024 Jan 8;14:1322638. doi: 10.3389/fpls.2023.1322638 (PMC10800985; doi:10.3389/fpls.2023.1322638)
Supplement: Supplementary file 1 [file Table_1.xlsx]

## Sheet: DEG
Sequence_id	E3F			Formulation blank			logFC	pval	BH	Cited genes in the publication	Swissprot_annot	Swissprot evalue	TAIR_name	TAIR_annot	TAIR evalue	IPR	GO terms
	E3F_R1.sf	E3F_R2.sf	E3F_R3.sf	FB_R1.sf	FB_R2.sf	FB_R3.sf
MD16G1019800	8	11	24	0	5	1	2.51452	0.0336632	0.999965		2-oxoglutarate (2OG) and Fe(II)-dependent oxygenase superfamily protein	7e-53	AT5G59530.1	2-oxoglutarate (2OG) and Fe(II)-dependent oxygenase superfamily protein	4e-54	IPR005123; IPR027443	GO:0016491,GO:0055114
MD16G1020100	89	46	90	32	39	21	0.97704	0.0307595	0.999965		2-oxoglutarate (2OG) and Fe(II)-dependent oxygenase superfamily protein	1e-112	AT5G59530.1	2-oxoglutarate (2OG) and Fe(II)-dependent oxygenase superfamily protein	5e-114	IPR005123; IPR026992; IPR027443	GO:0016491,GO:0055114
MD07G1269200	263	559	1228	120	155	172	1.7077	0.000115729	0.237564	TPS	(-)-germacrene D synthase	0.0	AT5G23960.1	terpene synthase 21	2e-133	IPR001906; IPR005630; IPR008930; IPR008949	GO:0000287,GO:0010333,GO:0016829,GO:0008152,GO:0010333,GO:0016829
MD04G1099500	2	3	27	0	0	0	5.30923	0.00778154	0.999965	NMD	(+)-neomenthol dehydrogenase	5e-108	AT3G61220.2	NAD(P)-binding Rossmann-fold superfamily protein	1e-106	IPR002198; IPR002347; IPR016040	GO:0008152,GO:0016491
MD10G1310600	261	148	213	49	79	16	1.88307	0.000121465	0.237564	TPS	(3S,6E)-nerolidol synthase 1	0.0	AT1G61680.1	terpene synthase 14	7e-151	IPR001906; IPR005630; IPR008930; IPR008949	GO:0000287,GO:0010333,GO:0016829,GO:0008152,GO:0010333,GO:0016829
MD00G1013000	118	30	18	10	2	1	3.48254	0.000681801	0.602401		(R)-mandelonitrile lyase 2	0.0	AT1G73050.1	Glucose-methanol-choline (GMC) oxidoreductase family protein	9e-173	IPR000172; IPR007867; IPR012132	GO:0050660,GO:0055114,GO:0055114,GO:0006066,GO:0008812,GO:0050660,GO:0055114
MD03G1091100	99	46	23	9	13	2	2.66074	0.00104919	0.804567		(R)-mandelonitrile lyase 3	0.0	AT1G73050.1	Glucose-methanol-choline (GMC) oxidoreductase family protein	0.0	IPR000172; IPR007867; IPR012132	GO:0050660,GO:0055114,GO:0055114,GO:0006066,GO:0008812,GO:0050660,GO:0055114
MD02G1298800	1	5	22	0	0	1	4.1693	0.0287374	0.999965		116 kDa U5 small nuclear ribonucleoprotein component	0.012	AT5G25230.1	Ribosomal protein S5/Elongation factor G/III/V family protein	0.0007	0	noGo
MD11G1312100	347	303	530	193	191	103	0.928731	0.00100044	0.8026		1-deoxy-D-xylulose-5-phosphate synthase	0.44	AT3G25900.1	Homocysteine S-methyltransferase family protein	0.096	#N/A	#N/A
MD09G1162600	12	58	691	8	7	4	4.75789	0.000482606	0.499497		23 kDa jasmonate-induced protein	6e-36	AT1G08150.1	Cation/hydrogen exchanger family protein	0.33	0	noGo
MD09G1162900	16	46	567	24	4	9	3.45548	0.0128813	0.999965		23 kDa jasmonate-induced protein	2e-36	AT1G79720.1	Eukaryotic aspartyl protease family protein	0.88	0	noGo
MD09G1162700	11	143	598	14	23	12	3.42713	9.97365e-05	0.2252		23 kDa jasmonate-induced protein	5e-39	AT1G77760.1	nitrate reductase 1	0.008	0	noGo
MD04G1214800	70	155	117	53	56	45	0.786994	0.0402514	0.999965		2-C-methyl-D-erythritol 4-phosphate cytidylyltransferase	7.5	AT1G56460.2	HIT zinc finger ;PAPA-1-like conserved region	7e-23	0	noGo
MD07G1187800	2	23	99	0	4	8	2.73294	0.0330818	0.999965	KCS	3-ketoacyl-CoA synthase 19	0.0	AT5G04530.1	3-ketoacyl-CoA synthase 19	0.0	IPR012392; IPR013601; IPR013747; IPR016038; IPR016039	GO:0003824,GO:0008152,GO:0006633,GO:0016020,GO:0008610
MD07G1187400	273	123	416	40	30	30	2.62272	9.69718e-09	0.000394123	KCS	3-ketoacyl-CoA synthase 19	0.0	AT5G04530.1	3-ketoacyl-CoA synthase 19	0.0	IPR012392; IPR013601; IPR013747; IPR016038; IPR016039	GO:0003824,GO:0008152,GO:0006633,GO:0016020,GO:0008610
MD02G1098500	4	11	28	1	2	0	3.44353	0.0111282	0.999965		3-oxoacyl-[acyl-carrier-protein] synthase II, chloroplastic	7e-58	AT1G74960.2	fatty acid biosynthesis 1	4e-59	IPR014030; IPR014031; IPR016038; IPR016039	GO:0003824,GO:0008152
MD15G1003500	202	355	486	176	227	101	0.691777	0.0281424	0.999965		4-coumarate--CoA ligase-like 5	0.0	AT1G20510.1	OPC-8:0 CoA ligase1	0.0	IPR000873; IPR020845; IPR025110	GO:0003824,GO:0008152
MD15G1131700	53	2	5	0	3	2	3.4528	0.0198046	0.999965	BIS	4-hydroxycoumarin synthase 2	0.0	AT5G13930.1	Chalcone and stilbene synthase family protein	1e-174	IPR001099; IPR011141; IPR012328; IPR016038; IPR016039	GO:0003824,GO:0008152,GO:0009058
MD07G1202500	31	35	37	8	22	2	1.45684	0.0440951	0.999965		60S ribosomal protein L27-1	2e-24	AT2G32220.1	Ribosomal L27e protein family	1e-25	IPR001141	GO:0003735,GO:0005622,GO:0005840,GO:0006412
MD09G1142800	41	86	197	29	66	11	1.26494	0.0424979	0.999965		7-deoxyloganetin glucosyltransferase	0.0	AT1G22360.1	UDP-glucosyl transferase 85A2	0.0	IPR002213	GO:0008152
MD09G1142500	60	122	55	30	47	13	1.1446	0.0353519	0.999965		7-deoxyloganetin glucosyltransferase	0.0	AT1G22400.1	UDP-Glycosyltransferase superfamily protein	0.0	IPR002213	GO:0008152
MD03G1211200	13	9	44	0	4	4	2.57833	0.017523	0.999965		ABC transporter B family member 15	0.0	AT3G28345.1	ABC transporter family protein	0.0	IPR001140; IPR003439; IPR003593; IPR011527; IPR017871; IPR017940; IPR027417	GO:0005524,GO:0016887,GO:0000166,GO:0017111,GO:0005524,GO:0006810,GO:0016021,GO:0055085
MD06G1099000	32	20	61	11	8	11	1.48223	0.0197294	0.999965		ABC transporter C family member 10	0.0	AT3G59140.1	multidrug resistance-associated protein 14	0.0	IPR001140; IPR003439; IPR003593; IPR011527; IPR017871; IPR017940; IPR027417	GO:0005524,GO:0016887,GO:0000166,GO:0017111,GO:0005524,GO:0006810,GO:0016021,GO:0055085
MD03G1286300	1623	1468	2086	1087	1110	690	0.503441	0.0164088	0.999965		ABC transporter C family member 4	0.0	AT2G47800.1	multidrug resistance-associated protein 4	0.0	IPR001140; IPR003439; IPR003593; IPR011527; IPR017871; IPR017940; IPR027417	GO:0005524,GO:0016887,GO:0000166,GO:0017111,GO:0005524,GO:0006810,GO:0016021,GO:0055085
MD01G1020400	23	37	35	14	11	5	1.3254	0.0286661	0.999965		ABC transporter F family member 5	5e-104	AT5G64840.1	general control non-repressible 5	3e-105	IPR003439; IPR017871; IPR027417	GO:0005524,GO:0016887
MD00G1192100	33	18	23	10	3	7	1.53026	0.0490099	0.999965	ABCG	ABC transporter G family member 12	1e-24	AT1G51500.1	ABC-2 type transporter family protein	7e-26	IPR003439; IPR027417	GO:0005524,GO:0016887
MD11G1189900	863	982	1931	577	592	492	0.771959	0.00330685	0.999965	ABCG	ABC transporter G family member 15	0.0	AT3G21090.1	ABC-2 type transporter family protein	0.0	IPR003439; IPR003593; IPR013525; IPR017871; IPR027417	GO:0005524,GO:0016887,GO:0000166,GO:0017111,GO:0016020
MD09G1204300	62	39	32	9	18	19	1.22659	0.0481061	0.999965	ABCG	ABC transporter G family member 36	0.0	AT1G59870.1	ABC-2 and Plant PDR ABC-type transporter family protein	0.0	IPR003439; IPR003593; IPR013525; IPR013581; IPR027417	GO:0000166,GO:0017111,GO:0005524,GO:0016887,GO:0016020
MD10G1010500	75	65	152	29	23	43	1.15403	0.0194954	0.999965	ABCG	ABC transporter G family member 6	0.92	AT1G31130.1	unknown protein; FUNCTIONS IN: molecular_function unknown; INVOLVED IN: biological_process unknown; LOCATED IN: cellular_component unknown; EXPRESSED IN: 23 plant structures; EXPRESSED DURING: 13 growth stages; BEST Arabidopsis thaliana protein match is: unknown protein (TAIR:AT4G19950.1); Has 246 Blast hits to 244 proteins in 29 species: Archae -2; Bacteria -16; Metazoa -0; Fungi -0; Plants -222…	2e-60	0	noGo
MD15G1082600	7	5	137	8	0	1	3.43498	0.0130723	0.999965		Abscisic acid 8'-hydroxylase 4	0.0	AT3G19270.1	cytochrome P450, family 707, subfamily A, polypeptide 4	0.0	IPR001128; IPR002401; IPR017972	GO:0055114,GO:0005506,GO:0009055,GO:0020037,GO:0055114,GO:0005506,GO:0020037,GO:0055114
MD09G1200900	437	134	4219	159	180	39	3.18837	0.0101541	0.999965		Acid phosphatase 1	2e-77	AT4G25150.1	HAD superfamily, subfamily IIIB acid phosphatase	2e-75	IPR005519; IPR010028; IPR014403; IPR023214	GO:0003993
MD09G1200500	3638	4437	11347	2297	4442	1588	0.853701	0.0245397	0.999965		Acid phosphatase 1	5e-82	AT4G25150.1	HAD superfamily, subfamily IIIB acid phosphatase	2e-79	IPR005519; IPR010028; IPR014403; IPR023214	GO:0003993
MD01G1213300	2932	829	488	453	251	63	2.32245	0.0281301	0.999965	PR-8 (qPCR)	Acidic endochitinase	2e-135	AT5G24090.1	chitinase A	8e-119	IPR001223; IPR001579; IPR013781; IPR017853	GO:0005975,GO:0003824,GO:0005975
MD14G1173400	31	49	28	8	12	4	1.89223	0.00339373	0.999965		Acidic mammalian chitinase	7e-39	AT4G19810.1	Glycosyl hydrolase family protein with chitinase insertion domain	4e-53	IPR001223; IPR011583; IPR013781; IPR017853	GO:0003824,GO:0005975,GO:0004568,GO:0006032,GO:0005975
MD01G1238700	109	43	31	0	5	0	5.08235	2.95552e-06	0.0240242		Alcohol dehydrogenase-like 1	2e-108	AT1G22430.1	GroES-like zinc-binding dehydrogenase family protein	9e-110	IPR002085; IPR002328; IPR011032; IPR013149; IPR013154; IPR016040	GO:0008270,GO:0016491,GO:0055114,GO:0016491,GO:0055114
MD11G1304900	121	111	157	40	88	57	0.734431	0.0370983	0.999965		Alkylated DNA repair protein alkB homolog 8	2e-14	AT4G02485.1	2-oxoglutarate (2OG) and Fe(II)-dependent oxygenase superfamily protein	1e-83	IPR005123; IPR027450	GO:0016491,GO:0055114
MD05G1081100	144	44	57	28	28	16	1.5343	0.0130771	0.999965		Alpha-amylase	0.0	AT4G25000.1	alpha-amylase-like	0.0	IPR006046; IPR006047; IPR006589; IPR012850; IPR013780; IPR013781; IPR015902; IPR017853	GO:0003824,GO:0005975,GO:0003824,GO:0005975,GO:0043169,GO:0003824,GO:0004556,GO:0005509,GO:0005975
MD08G1101700	158	110	136	73	84	24	0.899193	0.0440032	0.999965		Alpha-amylase	0.0	AT4G25000.1	alpha-amylase-like	2e-173	IPR006046; IPR006047; IPR006589; IPR012850; IPR013775; IPR013780; IPR013781; IPR015902; IPR017853	GO:0003824,GO:0005975,GO:0003824,GO:0005975,GO:0043169,GO:0004556,GO:0005509,GO:0005975,GO:0003824
MD10G1142800	71	60	69	23	45	13	1.04019	0.0288212	0.999965		Aminoacylase-1	3e-122	AT4G38220.2	Peptidase M20/M25/M40 family protein	0.0	IPR001261; IPR002933; IPR010159; IPR011650	GO:0006508,GO:0008237,GO:0008152,GO:0016787,GO:0004046,GO:0005737,GO:0006520
MD15G1139800	275	118	75	45	65	14	1.76976	0.00608919	0.999965		Ammonium transporter 3 member 1	0.0	AT2G38290.1	ammonium transporter 2	0.0	IPR001905; IPR018047; IPR024041	GO:0008519,GO:0016020,GO:0072488,GO:0008519,GO:0015696,GO:0016020
MD11G1229800	1176	1273	1536	584	1024	588	0.533744	0.0128734	0.999965		Anaerobic magnesium-protoporphyrin IX monomethyl ester [oxidative] cyclase	0.23	AT5G54585.1	unknown protein; Has 30201 Blast hits to 17322 proteins in 780 species: Archae -12; Bacteria -1396; Metazoa -17338; Fungi -3422; Plants -5037; Viruses -0; Other Eukaryotes -2996 (source: NCBI BLink).	1e-12	0	noGo
MD02G1085900	82	88	62	34	40	18	1.05667	0.017514	0.999965		Ankyrin repeat-containing protein BDA1	2e-35	AT5G51160.1	Ankyrin repeat family protein	9e-52	IPR002110; IPR020683; IPR026961; IPR027001	GO:0005515
MD03G1146300	422	653	634	275	341	284	0.558171	0.0169208	0.999965		Ankyrin repeat-containing protein NPR4	2e-12	AT3G18670.1	Ankyrin repeat family protein	8e-117	IPR002110; IPR020683; IPR026961	GO:0005515
MD02G1153000	100	25	45	16	17	4	2.00061	0.00734488	0.999965		Anthocyanidin 3-O-glucosyltransferase 5	3e-178	AT3G50740.1	UDP-glucosyl transferase 72E1	3e-148	IPR002213	GO:0008152
MD06G1103800	408	468	314	194	278	93	0.828281	0.0272368	0.999965		Anthocyanidin reductase ((2S)-flavan-3-ol-forming)	4e-54	AT1G61720.1	NAD(P)-binding Rossmann-fold superfamily protein	6e-45	IPR002225; IPR016040	GO:0003854,GO:0006694,GO:0055114
MD01G1089800	20	5	8	0	1	2	3.155	0.0246957	0.999965		Anthranilate N-methyltransferase	8e-78	AT5G54160.1	O-methyltransferase 1	3e-73	IPR001077	GO:0008171
MD09G1162800	4	297	1392	11	19	29	4.21292	0.00649204	0.999965		Arginine--tRNA ligase	3.3	AT4G21020.1	Late embryogenesis abundant protein (LEA) family protein	0.9	0	noGo
MD07G1202700	11	21	37	8	7	1	1.74192	0.0395652	0.999965		AT-hook motif nuclear-localized protein 15	5e-76	AT3G55560.1	AT-hook protein of GA feedback 2	3e-77	IPR005175; IPR014476	noGo
MD16G1109400	20	13	26	4	3	5	1.902	0.0183257	0.999965		BAHD acyltransferase At5g47980	6e-91	AT3G26040.1	HXXXD-type acyl-transferase family protein	3e-148	IPR003480; IPR023213	noGo
MD10G1098800	38	29	9	3	13	1	2.05293	0.0390711	0.999965		Basic secretory protease (Fragments)	2e-12	AT2G15220.1	Plant basic secretory protein (BSP) family protein	6e-104	IPR007541	noGo
MD11G1178400	89	37	45	14	16	11	1.79275	0.00293808	0.999965		Benzaldehyde dehydrogenase (NAD(+))	0.0	AT1G04580.1	aldehyde oxidase 4	0.0	IPR000674; IPR001041; IPR002346; IPR002888; IPR005107; IPR006058; IPR008274; IPR012675; IPR016166; IPR016169; IPR016208	GO:0016491,GO:0046872,GO:0055114,GO:0016491,GO:0055114,GO:0005506,GO:0016491,GO:0055114,GO:0009055,GO:0051536,GO:0050660,GO:0003824,GO:0050660,GO:0055114
MD04G1134300	383	144	62	32	30	12	2.82968	5.00171e-05	0.169404		Beta-1,3-glucosyltransferase	0.013	AT2G37730.1	Protein of unknown function (DUF604)	0.0	IPR006740	noGo
MD11G1157200	38	2	0	0	0	0	6.05228	0.00935553	0.999965		Beta-amyrin 28-oxidase	7e-165	AT5G36110.1	cytochrome P450, family 716, subfamily A, polypeptide 1	2e-144	IPR001128; IPR002401; IPR017972	GO:0055114,GO:0005506,GO:0009055,GO:0020037,GO:0055114,GO:0005506,GO:0020037,GO:0055114
MD05G1262700	232	146	114	55	75	5	1.70811	0.0139547	0.999965		Beta-amyrin 28-oxidase	7e-164	AT5G36110.1	cytochrome P450, family 716, subfamily A, polypeptide 1	2e-141	IPR001128; IPR002401; IPR017972	GO:0055114,GO:0005506,GO:0009055,GO:0020037,GO:0055114,GO:0005506,GO:0020037,GO:0055114
MD13G1284800	218	157	63	68	60	9	1.50929	0.0298407	0.999965		Beta-amyrin 28-oxidase	0.0	AT5G36110.1	cytochrome P450, family 716, subfamily A, polypeptide 1	0.0	IPR001128; IPR002401; IPR017972	GO:0055114,GO:0005506,GO:0009055,GO:0020037,GO:0055114,GO:0005506,GO:0020037,GO:0055114
MD09G1168200	432	701	1018	370	526	192	0.641589	0.0458494	0.999965		Beta-amyrin synthase	0.0	AT1G78950.1	Terpenoid cyclases family protein	0.0	IPR001330; IPR002365; IPR008930; IPR018333	GO:0016866,GO:0003824
MD02G1021400	2445	6653	9618	1666	3837	2581	0.796547	0.0493257	0.999965		Bifunctional purple acid phosphatase 26	8e-26	AT5G34850.1	purple acid phosphatase 26	5e-27	IPR025733	noGo
MD15G1164300	3070	6522	9150	2217	4605	1986	0.731155	0.0327935	0.999965		Bifunctional purple acid phosphatase 26	0.0	AT5G34850.1	purple acid phosphatase 26	0.0	IPR004843; IPR008963; IPR015914; IPR025733	GO:0016787,GO:0003993,GO:0046872
MD00G1176400	121	45	62	44	15	14	1.35491	0.0411788	0.999965		Bifunctional riboflavin kinase/FMN phosphatase	8e-79	AT4G21470.1	riboflavin kinase/FMN hydrolase	4e-80	IPR006439; IPR023214	GO:0008152,GO:0016787
MD02G1028600	21	1	13	0	0	0	5.69305	0.00300732	0.999965		Blue copper protein	1e-20	AT5G20230.1	blue-copper-binding protein	7e-22	IPR003245; IPR008972	GO:0005507,GO:0009055
MD15G1170100	94	19	10	17	4	3	2.17411	0.0365602	0.999965		Blue copper protein	1e-18	AT5G20230.1	blue-copper-binding protein	8e-20	IPR003245; IPR008972	GO:0005507,GO:0009055
MD02G1028700	105	59	43	29	7	7	1.98953	0.00665379	0.999965		Blue copper protein	2e-28	AT5G20230.1	blue-copper-binding protein	9e-30	IPR003245; IPR008972	GO:0005507,GO:0009055
MD15G1063000	73	118	125	22	44	18	1.58716	7.78236e-05	0.220159		Branched-chain-amino-acid aminotransferase 5, chloroplastic	4e-135	AT3G49680.1	branched-chain aminotransferase 3	7e-136	IPR001544; IPR005786; IPR018300	GO:0003824,GO:0008152,GO:0004084,GO:0009081
MD15G1409700	336	55	22	18	2	0	4.22427	0.0217911	0.999965		Caffeic acid 3-O-methyltransferase 1	3e-146	AT5G54160.1	O-methyltransferase 1	1e-137	IPR001077; IPR011991; IPR012967; IPR016461	GO:0008171,GO:0046983,GO:0008168
MD04G1178900	173	140	140	76	87	40	0.876954	0.0163574	0.999965		Calcium-binding protein CML42	8e-74	AT4G20780.1	calmodulin like 42	5e-75	IPR002048; IPR011992; IPR018247	GO:0005509
MD15G1296400	602	639	918	370	599	237	0.527054	0.0465686	0.999965		Calcium-transporting ATPase 2, plasma membrane-type	0.0	AT4G37640.1	calcium ATPase 2	0.0	IPR001757; IPR004014; IPR006068; IPR006408; IPR008250; IPR018303; IPR023214; IPR023298; IPR023299; IPR024750	GO:0000166,GO:0046872,GO:0005516,GO:0005388,GO:0005524,GO:0016020,GO:0070588,GO:0006812,GO:0016021,GO:0019829
MD11G1277800	12	4	9	0	0	0	5.18388	0.00450658	0.999965		Calmodulin-like protein 8	2e-66	AT4G14640.1	calmodulin 8	1e-67	IPR002048; IPR011992; IPR018247	GO:0005509
MD10G1037400	234	236	422	107	95	148	0.904545	0.0133665	0.999965		Calpain-9	4.2	AT5G20570.2	RING-box 1	0.47	0	noGo
MD16G1230700	308	407	384	227	209	132	0.617501	0.017554	0.999965		Carboxyl-terminal-processing peptidase 2, chloroplastic	6e-54	AT4G17740.1	Peptidase S41 family protein	4e-55	IPR005151	GO:0006508,GO:0008236
MD16G1230600	634	751	761	490	439	261	0.522395	0.0377044	0.999965		Carboxyl-terminal-processing peptidase 2, chloroplastic	2e-140	AT4G17740.1	Peptidase S41 family protein	1e-141	IPR001478	GO:0005515
MD10G1254300	34	38	23	13	11	4	1.49054	0.0252591	0.999965		Cationic amino acid transporter 1	0.0	AT4G21120.1	amino acid transporter 1	0.0	IPR002293; IPR015606	GO:0003333,GO:0015171,GO:0016020
MD05G1167400	5887	7973	16928	4187	6630	3549	0.706857	0.0209466	0.999965		Chloroplast envelope quinone oxidoreductase homolog	1e-169	AT4G13010.1	Oxidoreductase, zinc-binding dehydrogenase family protein	6e-171	IPR002085; IPR011032; IPR013154; IPR016040; IPR020843	GO:0016491,GO:0008270,GO:0016491,GO:0055114,GO:0016491,GO:0055114
MD07G1066200	4012	4542	5085	2150	3415	1404	0.672756	0.00547007	0.999965		Copper transport protein ATX1	2e-32	AT1G66240.1	homolog of anti-oxidant 1	9e-34	IPR006121	GO:0030001,GO:0046872
MD07G1206200	276	841	1513	225	458	161	1.25618	0.00789676	0.999965		Cucumisin	0.0	AT5G59190.1	subtilase family protein	0.0	IPR000209; IPR010259; IPR015500; IPR023828	GO:0004252,GO:0006508,GO:0004252,GO:0042802,GO:0043086
MD07G1206700	932	1176	2743	758	598	748	0.732026	0.0416264	0.999965		Cucumisin	0.0	AT5G59190.1	subtilase family protein	0.0	IPR000209; IPR010259; IPR015500; IPR023828	GO:0004252,GO:0006508,GO:0004252,GO:0042802,GO:0043086
MD07G1206500	165	186	301	122	135	72	0.628448	0.0261882	0.999965		Cucumisin	4e-49	AT4G00230.1	xylem serine peptidase 1	2e-41	IPR015500	noGo
MD07G1292500	5	10	20	1	0	0	4.58088	0.0047685	0.999965		Cyclic nucleotide-gated ion channel 1	2e-134	AT5G53130.1	cyclic nucleotide gated channel 1	9e-136	IPR000595; IPR014710; IPR018490	noGo
MD07G1291400	20	16	20	0	3	0	3.98234	0.00130162	0.866524		Cyclic nucleotide-gated ion channel 1	7e-137	AT5G53130.1	cyclic nucleotide gated channel 1	4e-138	IPR000595; IPR014710; IPR018490	noGo
MD07G1292700	633	645	354	185	444	81	1.03048	0.0414539	0.999965		Cyclic nucleotide-gated ion channel 1	2e-118	AT5G53130.1	cyclic nucleotide gated channel 1	1e-119	IPR000595; IPR014710; IPR018490	noGo
MD01G1079600	327	380	464	225	216	141	0.658967	0.00362047	0.999965		Cyclic nucleotide-gated ion channel 1	0.0	AT5G53130.1	cyclic nucleotide gated channel 1	0.0	IPR000048; IPR000595; IPR005821; IPR014710; IPR018490	GO:0005216,GO:0006811,GO:0016020,GO:0055085,GO:0005515
MD05G1340400	28	25	29	10	8	6	1.43643	0.020296	0.999965	RLK	Cysteine-rich receptor-like protein kinase 25	4e-155	AT4G05200.1	cysteine-rich RLK (RECEPTOR-like protein kinase) 25	2e-156	IPR000719; IPR002290; IPR002902; IPR008271; IPR011009; IPR013320; IPR017441; IPR020635	GO:0005524,GO:0004672,GO:0005524,GO:0006468,GO:0004674,GO:0006468,GO:0004713,GO:0006468
MD05G1337000	138	96	104	67	43	24	1.0402	0.0250359	0.999965	RLK	Cysteine-rich receptor-like protein kinase 25	0.0	AT4G05200.1	cysteine-rich RLK (RECEPTOR-like protein kinase) 25	0.0	IPR000719; IPR001245; IPR002290; IPR002902; IPR008271; IPR011009; IPR013320; IPR017441; IPR020635	GO:0005524,GO:0004672,GO:0005524,GO:0006468,GO:0004672,GO:0006468,GO:0004674,GO:0006468,GO:0004713,GO:0006468
MD10G1313800	123	79	158	70	59	38	0.759374	0.0479517	0.999965	RLK	Cysteine-rich receptor-like protein kinase 25	0.0	AT4G05200.1	cysteine-rich RLK (RECEPTOR-like protein kinase) 25	0.0	IPR000719; IPR001245; IPR002290; IPR002902; IPR008271; IPR011009; IPR013320; IPR020635	GO:0004672,GO:0005524,GO:0006468,GO:0004672,GO:0006468,GO:0004674,GO:0006468,GO:0004713,GO:0006468
MD00G1101400	28	9	13	4	2	1	2.5779	0.0138055	0.999965	RLK	Cysteine-rich receptor-like protein kinase 27	6e-147	AT4G21230.1	cysteine-rich RLK (RECEPTOR-like protein kinase) 27	4e-148	IPR000719; IPR002290; IPR002902; IPR008271; IPR011009; IPR013320; IPR017441; IPR020635	GO:0005524,GO:0004672,GO:0005524,GO:0006468,GO:0004674,GO:0006468,GO:0004713,GO:0006468
MD05G1336800	278	216	367	145	103	34	1.29389	0.00380274	0.999965	RLK	Cysteine-rich receptor-like protein kinase 29	0.0	AT4G21410.1	cysteine-rich RLK (RECEPTOR-like protein kinase) 29	0.0	IPR000719; IPR002290; IPR002902; IPR008271; IPR011009; IPR013320; IPR017441; IPR020635	GO:0005524,GO:0004672,GO:0005524,GO:0006468,GO:0004674,GO:0006468,GO:0004713,GO:0006468
MD13G1029600	369	285	253	173	176	99	0.738701	0.0332004	0.999965		Cysteine-rich repeat secretory protein 12	3e-99	AT2G01660.1	plasmodesmata-located protein 6	2e-100	IPR002902	noGo
MD05G1056000	58	47	17	13	8	4	2.05145	0.00747468	0.999965		Cysteine-rich repeat secretory protein 38	6e-82	AT3G22060.1	Receptor-like protein kinase-related family protein	3e-83	IPR002902	noGo
MD05G1337400	240	163	75	72	70	6	1.53914	0.0366992	0.999965		Cysteine-rich repeat secretory protein 38	5e-39	AT3G22060.1	Receptor-like protein kinase-related family protein	3e-40	IPR002902	noGo
MD10G1153400	45	7	9	1	1	0	4.77264	0.00139897	0.888422		Cysteine-rich repeat secretory protein 55	6e-100	AT5G48540.1	receptor-like protein kinase-related family protein	3e-101	IPR002902	noGo
MD11G1049600	31	10	94	9	3	7	2.31349	0.00828955	0.999965	CYP450	Cytochrome P450 714C2	0.0	AT5G24910.1	cytochrome P450, family 714, subfamily A, polypeptide 1	8e-168	IPR001128; IPR002401; IPR017972	GO:0055114,GO:0005506,GO:0009055,GO:0020037,GO:0055114,GO:0005506,GO:0020037,GO:0055114
MD15G1029500	90	67	37	22	30	6	1.55206	0.0162181	0.999965	CYP450	Cytochrome P450 734A1	6e-154	AT1G75130.1	cytochrome P450, family 721, subfamily A, polypeptide 1	0.0	IPR001128; IPR002401; IPR017972	GO:0055114,GO:0005506,GO:0009055,GO:0020037,GO:0055114,GO:0005506,GO:0020037,GO:0055114
MD15G1028200	77	27	17	1	1	0	5.7342	1.77032e-05	0.0799455	CYP450	Cytochrome P450 82A3	0.0	AT4G31940.1	cytochrome P450, family 82, subfamily C, polypeptide 4	1e-172	IPR001128; IPR002401; IPR017972	GO:0055114,GO:0005506,GO:0009055,GO:0020037,GO:0055114,GO:0005506,GO:0020037,GO:0055114
MD03G1091600	140	6	32	4	0	0	5.26976	0.000125686	0.237564	CYP450	Cytochrome P450 82A3	0.0	AT4G31940.1	cytochrome P450, family 82, subfamily C, polypeptide 4	1e-167	IPR001128; IPR002401; IPR017972	GO:0055114,GO:0005506,GO:0009055,GO:0020037,GO:0055114,GO:0005506,GO:0020037,GO:0055114
MD15G1028700	201	86	19	13	12	12	2.8373	0.000446155	0.490083	CYP450	Cytochrome P450 82A3	0.0	AT4G31940.1	cytochrome P450, family 82, subfamily C, polypeptide 4	1e-175	IPR001128; IPR002401; IPR017972	GO:0055114,GO:0005506,GO:0009055,GO:0020037,GO:0055114,GO:0005506,GO:0020037,GO:0055114
MD05G1170000	91	54	10	3	27	0	2.37352	0.0431258	0.999965	CYP450	Cytochrome P450 82C4	8e-171	AT4G31940.1	cytochrome P450, family 82, subfamily C, polypeptide 4	5e-172	IPR001128; IPR002401; IPR017972	GO:0055114,GO:0005506,GO:0009055,GO:0020037,GO:0055114,GO:0005506,GO:0020037,GO:0055114
MD10G1176900	0	9	27	0	0	0	5.48942	0.0143128	0.999965	CYP450	Cytochrome P450 82G1	1e-153	AT3G25180.1	cytochrome P450, family 82, subfamily G, polypeptide 1	7e-155	IPR001128; IPR002401; IPR017972	GO:0055114,GO:0005506,GO:0009055,GO:0020037,GO:0055114,GO:0005506,GO:0020037,GO:0055114
MD07G1273000	37	46	76	17	29	20	0.88954	0.0483766	0.999965	CYP450	Cytochrome P450 89A2	3e-167	AT1G64940.1	cytochrome P450, family 87, subfamily A, polypeptide 6	0.0	IPR001128; IPR002401; IPR017972	GO:0055114,GO:0005506,GO:0009055,GO:0020037,GO:0055114,GO:0005506,GO:0020037,GO:0055114
MD15G1436500	421	260	194	98	147	25	1.5261	0.00593615	0.999965	CYP450	Cytochrome P450 98A2	0.0	AT2G40890.1	cytochrome P450, family 98, subfamily A, polypeptide 3	0.0	IPR001128; IPR002401; IPR017972	GO:0055114,GO:0005506,GO:0009055,GO:0020037,GO:0055114,GO:0005506,GO:0020037,GO:0055114
MD11G1274100	183	65	374	59	93	62	1.13695	0.0290847	0.999965	CYP450	Cytochrome P450 CYP72A219	0.0	AT3G14690.1	cytochrome P450, family 72, subfamily A, polypeptide 15	0.0	IPR001128; IPR002401; IPR017972	GO:0055114,GO:0005506,GO:0009055,GO:0020037,GO:0055114,GO:0005506,GO:0020037,GO:0055114
MD11G1220400	47	17	11	5	10	0	2.22665	0.0387255	0.999965	CYP450	Cytochrome P450 CYP736A12	6e-174	AT5G07990.1	Cytochrome P450 superfamily protein	1e-128	IPR001128; IPR002401; IPR017972	GO:0055114,GO:0005506,GO:0009055,GO:0020037,GO:0055114,GO:0005506,GO:0020037,GO:0055114
MD07G1270900	67	26	19	6	3	0	3.44782	0.00058544	0.55335		Cytosolic beta-glucosidase	1.5	AT5G52390.1	PAR1 protein	9e-70	IPR009489	noGo
MD03G1034400	108	36	32	8	1	4	3.47218	8.85511e-05	0.220159		DEAD-box ATP-dependent RNA helicase 20	3e-148	AT1G55150.1	DEA(D/H)-box RNA helicase family protein	2e-145	IPR001650; IPR011545; IPR014001; IPR014014; IPR027417	GO:0003676,GO:0005524,GO:0008026,GO:0003676,GO:0004386,GO:0005524
MD09G1025500	14	43	31	6	13	8	1.35231	0.0471689	0.999965		Denticleless protein homolog	1.2	AT3G27570.1	Sucrase/ferredoxin-like family protein	3e-30	IPR009737; IPR012336	noGo
MD07G1249900	178	84	73	35	14	17	2.0569	0.000770017	0.660117		Derlin-1	1e-90	AT4G29330.1	DERLIN-1	8e-92	IPR007599	noGo
MD16G1012000	35	5	1	0	0	0	6.06105	0.00227785	0.999965		D-galacturonate reductase	9e-179	AT1G59960.1	NAD(P)-linked oxidoreductase superfamily protein	2e-107	IPR001395; IPR018170; IPR020471; IPR023210	GO:0016491,GO:0055114
MD03G1164800	787	1134	973	442	801	387	0.52614	0.0467043	0.999965		Dihydropyrimidinase	0.0	AT5G12200.1	pyrimidine 2	0.0	IPR011059; IPR011778	GO:0005737,GO:0006208
MD08G1083600	380	476	595	202	249	285	0.575588	0.04275	0.999965		Disease resistance protein At4g27190	4e-65	AT4G27190.1	NB-ARC domain-containing disease resistance protein	2e-66	IPR000767; IPR002182; IPR003593; IPR025875; IPR027417	GO:0000166,GO:0017111,GO:0006952,GO:0043531
MD12G1084200	6	10	7	1	0	0	4.07139	0.01674	0.999965		DNA damage-inducible protein 1	1e-17	AT3G13235.1	ubiquitin family protein	5e-32	IPR019103; IPR021109	GO:0004190,GO:0006508
MD17G1179900	8	12	6	0	0	0	5.23923	0.00314083	0.999965		DNA ligase	0.93	AT1G51920.1	unknown protein; FUNCTIONS IN: molecular_function unknown; INVOLVED IN: biological_process unknown; LOCATED IN: endomembrane system; EXPRESSED IN: stem, stamen; EXPRESSED DURING: 4 anthesis; Has 22 Blast hits to 22 proteins in 5 species: Archae -0; Bacteria -0; Metazoa -0; Fungi -0; Plants -22; Viruses -0; Other Eukaryotes -0 (source: NCBI BLink).	3e-10	0	noGo
MD07G1239500	20	19	15	3	4	3	2.12487	0.0108316	0.999965		DNA-directed RNA polymerase subunit beta	0.93	AT4G33550.1	Bifunctional inhibitor/lipid-transfer protein/seed storage 2S albumin superfamily protein	5e-08	IPR016140	noGo
MD03G1159300	205	127	345	109	64	28	1.39036	0.00486197	0.999965		DNA-directed RNA polymerase subunit beta'	1.8	AT1G20400.1	Protein of unknown function (DUF1204)	1.0	0	noGo
MD02G1273900	1	0	31	0	0	0	5.25565	0.0385357	0.999965		Down syndrome cell adhesion molecule-like protein Dscam2	1.0	AT5G25060.1	RNA recognition motif (RRM)-containing protein	0.22	0	noGo
MD14G1039900	44	14	8	1	4	0	3.62596	0.00338716	0.999965		E3 ubiquitin-protein ligase PUB24	6e-118	AT3G11840.1	plant U-box 24	6e-119	IPR003613; IPR011989; IPR013083; IPR016024	GO:0000151,GO:0004842,GO:0016567,GO:0005488
MD11G1246600	488	277	179	145	60	38	1.71026	0.00337034	0.999965		E3 ubiquitin-protein ligase UBR1	2.2	AT4G21700.1	Protein of unknown function (DUF2921)	1e-158	IPR021319	noGo
MD00G1173900	6	6	7	0	0	0	4.75218	0.0126204	0.999965		E3 ubiquitin-protein ligase UPL3	2e-47	AT4G38600.1	HEAT repeat ;HECT-domain (ubiquitin-transferase)	1e-48	IPR000569	GO:0004842
MD15G1170400	161	51	34	7	3	3	4.01747	1.85828e-06	0.0188815		Early nodulin-like protein 1	7e-25	AT2G25060.1	early nodulin-like protein 14	4e-26	IPR003245; IPR008972	GO:0005507,GO:0009055
MD02G1028800	61	9	8	6	0	0	3.5091	0.0151588	0.999965		Early nodulin-like protein 1	4e-24	AT2G25060.1	early nodulin-like protein 14	2e-25	IPR003245; IPR008972	GO:0005507,GO:0009055
MD15G1206200	341	336	809	169	320	165	0.807487	0.017315	0.999965		Ectonucleotide pyrophosphatase/phosphodiesterase family member 3	1e-84	AT4G29680.1	Alkaline-phosphatase-like family protein	0.0	IPR002591; IPR017849; IPR017850; IPR024873	GO:0003824,GO:0008152,GO:0003824
MD13G1181700	185	328	441	156	162	156	0.592994	0.0497857	0.999965		Endo-1,3;1,4-beta-D-glucanase	2e-39	AT3G23600.1	alpha/beta-Hydrolases superfamily protein	3e-109	IPR002925	GO:0016787
MD02G1120200	747	225	72	47	8	5	3.93933	0.00241653	0.999965		Endochitinase	4e-171	AT3G12500.1	basic chitinase	8e-142	IPR000726; IPR001002; IPR016283; IPR018371; IPR023346	GO:0008061,GO:0004568,GO:0006032,GO:0016998,GO:0004568,GO:0005975
MD02G1120300	449	181	143	110	88	32	1.55409	0.00808155	0.999965		Endochitinase	2e-150	AT3G12500.1	basic chitinase	2e-130	IPR000726; IPR016283; IPR023346	GO:0004568,GO:0005975,GO:0004568,GO:0006032,GO:0016998
MD04G1048000	607	196	288	101	84	18	2.22797	0.000259825	0.391113		Endochitinase EP3	2e-145	AT3G54420.1	homolog of carrot EP3-3 chitinase	1e-146	IPR000726; IPR001002; IPR016283; IPR018371; IPR023346	GO:0008061,GO:0004568,GO:0006032,GO:0016998,GO:0004568,GO:0005975
MD04G1047700	293	303	263	42	223	98	0.985848	0.0444715	0.999965		Endochitinase EP3	2e-107	AT3G54420.1	homolog of carrot EP3-3 chitinase	1e-108	IPR000726; IPR016283; IPR023346	GO:0004568,GO:0005975,GO:0004568,GO:0006032,GO:0016998
MD02G1138500	67	24	23	13	10	1	2.06876	0.0185015	0.999965		Epoxide hydrolase A	1e-69	AT3G51000.1	alpha/beta-Hydrolases superfamily protein	2e-148	IPR000073; IPR000639	GO:0003824
MD10G1305000	136	121	174	79	78	52	0.698359	0.0184771	0.999965		Equilibrative nucleotide transporter 3	0.0	AT4G05120.1	Major facilitator superfamily protein	0.0	IPR002259	GO:0005337,GO:0006810,GO:0016021
MD10G1133700	65	86	82	39	25	31	0.91575	0.027781	0.999965		ER membrane protein complex subunit 4	0.52	AT5G10780.2	FUNCTIONS IN: molecular_function unknown; INVOLVED IN: biological_process unknown; LOCATED IN: cellular_component unknown; EXPRESSED IN: 22 plant structures; EXPRESSED DURING: 14 growth stages; CONTAINS InterPro DOMAIN/s: Uncharacterised conserved protein UCP017207, transmembrane protein 85 (InterPro:IPR016687), Protein of unknown function DUF1077 (InterPro:IPR009445); Has 395 Blast hits to 395 p…	8e-09	IPR009445	noGo
MD15G1274100	28	35	4	2	8	1	2.47528	0.0249203	0.999965		Esterase P	0.18	AT2G16210.1	Transcriptional factor B3 family protein	0.03	0	noGo
MD14G1147100	21	6	5	3	1	0	2.80331	0.045022	0.999965	ERF	Ethylene-responsive transcription factor ERF114	2e-44	AT5G61890.1	Integrase-type DNA-binding superfamily protein	1e-45	IPR001471; IPR016177	GO:0003700,GO:0003677
MD14G1202100	60	7	19	2	9	6	2.13001	0.0328067	0.999965		Expansin-A1	3e-151	AT2G03090.1	expansin A15	1e-151	IPR002963; IPR007112; IPR007117; IPR007118; IPR009009; IPR014733	GO:0005576,GO:0009664
MD07G1089600	9	9	12	2	0	0	3.543	0.0193722	0.999965		Exportin-1	1.2	AT4G31160.1	DDB1-CUL4 associated factor 1	0.29	0	noGo
MD00G1165300	54	188	36	23	33	0	2.14018	0.0298461	0.999965		Extradiol ring-cleavage dioxygenase	2e-118	AT4G15093.1	catalytic LigB subunit of aromatic ring-opening dioxygenase family	1e-119	IPR004183; IPR014436	GO:0008270,GO:0055114,GO:0006725,GO:0008198,GO:0016491
MD04G1237400	39	17	16	3	1	9	2.07529	0.0367234	0.999965		F-box protein At2g02240	4e-73	AT2G02240.1	F-box family protein	2e-74	IPR001810; IPR025886	GO:0005515
MD04G1239300	25	10	18	2	6	5	1.71964	0.049765	0.999965		F-box protein At2g02240	8e-70	AT2G02240.1	F-box family protein	4e-71	IPR001810; IPR025886	GO:0005515
MD16G1117600	3147	2052	2938	1459	1381	1290	0.63397	0.024143	0.999965		F-box/kelch-repeat protein At1g67480	2e-166	AT1G67480.1	Galactose oxidase/kelch repeat superfamily protein	1e-167	IPR001810; IPR006652; IPR015916	GO:0005515
MD17G1167200	250	70	125	82	28	36	1.30698	0.0378901	0.999965		Flavonoid 3'-monooxygenase	6e-143	AT5G07990.1	Cytochrome P450 superfamily protein	3e-144	IPR001128; IPR002401; IPR017972	GO:0055114,GO:0005506,GO:0009055,GO:0020037,GO:0055114,GO:0005506,GO:0020037,GO:0055114
MD14G1145500	450	176	288	178	80	82	1.11363	0.0268366	0.999965		G2/mitotic-specific cyclin-B	0.011	AT5G61820.1	FUNCTIONS IN: molecular_function unknown; INVOLVED IN: biological_process unknown; LOCATED IN: vacuole; EXPRESSED IN: 24 plant structures; EXPRESSED DURING: 15 growth stages; CONTAINS InterPro DOMAIN/s: Stress up-regulated Nod 19 (InterPro:IPR011692); Has 30201 Blast hits to 17322 proteins in 780 species: Archae -12; Bacteria -1396; Metazoa -17338; Fungi -3422; Plants -5037; Viruses -0; Other Euk…	4e-160	IPR011692	noGo
MD07G1082500	370	400	386	227	118	65	1.17529	0.00527208	0.999965		Gamma-aminobutyric acid type B receptor subunit 2	4.1	AT4G23120.1	Bromo-adjacent homology (BAH) domain-containing protein	1.7	0	noGo
MD05G1256000	125	177	176	79	90	76	0.601964	0.0320462	0.999965		GDP-fucose protein O-fucosyltransferase 1	0.0004	AT3G05320.1	O-fucosyltransferase family protein	0.0	IPR019378	noGo
MD09G1174600	20	10	4	3	0	0	3.26594	0.034505	0.999965	GDSL	GDSL esterase/lipase 2	2e-126	AT1G53990.1	GDSL-motif lipase 3	1e-122	IPR001087; IPR013831	GO:0016787,GO:0006629
MD08G1009700	22	13	6	1	2	3	2.49128	0.0259662	0.999965	GDSL	GDSL esterase/lipase EXL3	5e-137	AT1G75900.1	GDSL-like Lipase/Acylhydrolase superfamily protein	3e-138	IPR001087; IPR008265; IPR013831	GO:0016787,GO:0006629,GO:0016298,GO:0006629
MD02G1126900	189	467	632	77	217	202	0.939991	0.0457508	0.999965	GDSL	GDSL esterase/lipase EXL3	3e-139	AT1G75900.1	GDSL-like Lipase/Acylhydrolase superfamily protein	2e-140	IPR001087; IPR013831	GO:0016787,GO:0006629
MD04G1234700	329	258	74	73	35	15	2.21308	0.00112101	0.841622	GDSL	GDSL esterase/lipase LTL1	0.0	AT3G04290.1	Li-tolerant lipase 1	0.0	IPR001087; IPR008265; IPR013831	GO:0016787,GO:0006629,GO:0016298,GO:0006629
MD04G1234400	813	1375	1749	657	610	430	0.828566	0.0010479	0.804567	GDSL	GDSL esterase/lipase LTL1	0.0	AT3G04290.1	Li-tolerant lipase 1	0.0	IPR001087; IPR013831	GO:0016787,GO:0006629
MD04G1234500	158	243	74	47	54	15	1.81409	0.00167741	0.931416	GDSL	GDSL esterase/lipase LTL1	0.0	AT3G04290.1	Li-tolerant lipase 1	0.0	IPR001087; IPR008265; IPR013831	GO:0016787,GO:0006629,GO:0016298,GO:0006629
MD16G1116100	44	46	62	17	32	5	1.22291	0.0350746	0.999965		Geraniol 8-hydroxylase	0.0	AT2G45550.1	cytochrome P450, family 76, subfamily C, polypeptide 4	7e-177	IPR001128; IPR002401; IPR017972	GO:0055114,GO:0005506,GO:0009055,GO:0020037,GO:0055114,GO:0005506,GO:0020037,GO:0055114
MD11G1296000	481	356	286	215	237	110	0.746451	0.0493951	0.999965		Gibberellin receptor GID1B	0.0	AT3G63010.1	alpha/beta-Hydrolases superfamily protein	0.0	IPR002168; IPR013094	GO:0008152,GO:0016787
MD17G1039200	30	55	61	10	25	4	1.61813	0.00980964	0.999965		Gibberellin-regulated protein 14	7e-26	AT5G14920.1	Gibberellin-regulated family protein	4e-27	IPR003854	noGo
MD12G1084100	57	22	11	8	1	3	2.64531	0.00949048	0.999965	PR-2	Glucan endo-1,3-beta-glucosidase	4e-136	AT3G57270.1	beta-1,3-glucanase 1	3e-122	IPR000490; IPR013781; IPR017853	GO:0003824,GO:0005975,GO:0005975
MD11G1189000	894	206	163	100	37	16	2.86807	0.00768052	0.999965	PR-2	Glucan endo-1,3-beta-glucosidase, acidic isoform GI9	1e-126	AT4G16260.1	Glycosyl hydrolase superfamily protein	1e-117	IPR000490; IPR013781; IPR017853	GO:0003824,GO:0005975,GO:0005975
MD12G1089500	270	36	45	32	14	7	2.55698	0.00324273	0.999965	PR-2	Glucan endo-1,3-beta-glucosidase, acidic isoform GI9	6e-118	AT4G16260.1	Glycosyl hydrolase superfamily protein	2e-114	IPR000490; IPR013781; IPR017853	GO:0003824,GO:0005975,GO:0005975
MD12G1083900	9	4	4	0	0	0	4.66882	0.0202867	0.999965	PR-2	Glucan endo-1,3-beta-glucosidase, basic isoform	6e-121	AT3G57270.1	beta-1,3-glucanase 1	2e-112	IPR000490; IPR013781; IPR017853	GO:0003824,GO:0005975,GO:0005975
MD14G1080000	265	98	38	19	81	2	1.96591	0.0394334	0.999965	PR-2	Glucan endo-1,3-beta-glucosidase, basic isoform	0.0	AT3G57240.1	beta-1,3-glucanase 3	6e-149	IPR000490; IPR013781; IPR017853	GO:0003824,GO:0005975,GO:0005975
MD03G1171500	1236	644	258	219	145	25	2.30339	0.0210753	0.999965	PR-2	Glucan endo-1,3-beta-glucosidase, basic vacuolar isoform	2e-124	AT4G16260.1	Glycosyl hydrolase superfamily protein	9e-118	IPR000490; IPR013781; IPR017853	GO:0003824,GO:0005975,GO:0005975
MD17G1122400	152	282	518	80	131	78	1.31328	0.000467625	0.499497		Glucose-1-phosphate adenylyltransferase small subunit, chloroplastic	0.0	AT5G48300.1	ADP glucose pyrophosphorylase 1	0.0	IPR005835; IPR005836	GO:0009058,GO:0016779,GO:0005978,GO:0008878
MD10G1214100	65	9	5	8	2	3	2.40846	0.0383223	0.999965		Glucose-6-phosphate isomerase	0.35	AT5G43600.1	ureidoglycolate amidohydrolase	3.7	0	noGo
MD08G1048100	44	12	21	6	2	2	2.6643	0.0048199	0.999965		Glutamate receptor 2.2	0.0	AT2G24720.1	glutamate receptor 2.2	0.0	IPR001320; IPR001638; IPR001828; IPR017103; IPR028082	GO:0004970,GO:0005234,GO:0016020,GO:0005215,GO:0006810
MD08G1047600	447	460	672	238	238	302	0.609497	0.0362227	0.999965		Glutamate receptor 2.7	0.0	AT2G29120.1	glutamate receptor 2.7	0.0	IPR001320; IPR001638; IPR001828; IPR017103; IPR028082	GO:0004970,GO:0005234,GO:0016020,GO:0005215,GO:0006810
MD15G1059200	4	7	7	0	0	0	4.64966	0.017373	0.999965		Glutamate receptor 2.8	0.0	AT2G29110.1	glutamate receptor 2.8	0.0	IPR001320; IPR001638; IPR001828; IPR017103; IPR028082	GO:0004970,GO:0005234,GO:0016020,GO:0005215,GO:0006810
MD08G1048200	377	41	78	48	6	11	2.70269	0.00345765	0.999965		Glutamate receptor 2.8	0.0	AT2G29110.1	glutamate receptor 2.8	0.0	IPR001320; IPR001638; IPR001828; IPR017103; IPR028082	GO:0004970,GO:0005234,GO:0016020,GO:0005215,GO:0006810
MD15G1046000	24	37	26	5	4	3	2.52509	0.000527693	0.510643		Glutamate receptor 2.8	0.0	AT2G29110.1	glutamate receptor 2.8	0.0	IPR001320; IPR001638; IPR001828; IPR017103; IPR028082	GO:0004970,GO:0005234,GO:0016020,GO:0005215,GO:0006810
MD17G1062500	73	70	62	36	40	14	0.912841	0.0494006	0.999965		Glutamyl-tRNA reductase	1.4	AT4G09900.1	methyl esterase 12	0.39	0	noGo
MD03G1282900	291	43	56	15	11	0	3.80663	0.0114633	0.999965	GST	Glutathione S-transferase	6e-99	AT1G02920.1	glutathione S-transferase 7	5e-93	IPR004045; IPR004046; IPR010987; IPR012336; IPR017933	GO:0005515
MD10G1196300	247	333	763	47	311	62	1.38038	0.0187348	0.999965	GST	Glutathione S-transferase	2e-121	AT1G78380.1	glutathione S-transferase TAU 19	4e-112	IPR004045; IPR004046; IPR010987; IPR012336; IPR017933	GO:0005515
MD02G1236100	221	124	124	45	97	57	0.979826	0.0307482	0.999965	GST	Glutathione S-transferase	5e-68	AT3G09270.1	glutathione S-transferase TAU 8	3e-66	IPR004045; IPR004046; IPR010987; IPR012336; IPR017933	GO:0005515
MD04G1111600	13	18	68	0	11	4	2.32539	0.024139	0.999965	GST	Glutathione S-transferase L3	4e-111	AT5G02790.1	Glutathione S-transferase family protein	2e-112	IPR004045; IPR010987; IPR012336; IPR017933	GO:0005515
MD13G1082000	1081	889	500	399	561	239	0.819601	0.0451101	0.999965	GST	Glutathione S-transferase U17	1e-105	AT1G10370.1	Glutathione S-transferase family protein	7e-107	IPR004045; IPR004046; IPR010987; IPR012336; IPR017933	GO:0005515
MD05G1251900	74	59	78	34	37	14	1.01276	0.0222255	0.999965	GST	Glutathionyl-hydroquinone reductase YqjG	4e-100	AT4G19880.2	Glutathione S-transferase family protein	0.0	IPR004045; IPR010987; IPR012336; IPR016639; IPR017933	GO:0005515
MD00G1069900	359	454	256	104	218	94	1.11034	0.00422456	0.999965		GPI ethanolamine phosphate transferase 1	0.15	AT5G46910.1	Transcription factor jumonji (jmj) family protein / zinc finger (C5HC2 type) family protein	0.41	0	noGo
MD16G1223000	58	36	81	12	19	20	1.39156	0.00739071	0.999965		GPI transamidase component PIG-T	1e-70	AT3G07140.1	GPI transamidase component Gpi16 subunit family protein	0.0	IPR007245	GO:0016255,GO:0042765
MD02G1047300	37	22	11	6	7	1	2.14067	0.0200349	0.999965	RLK	G-type lectin S-receptor-like serine/threonine-protein kinase At1g11330	1e-130	AT1G11330.2	S-locus lectin protein kinase family protein	7e-132	IPR000719; IPR001245; IPR002290; IPR008271; IPR011009; IPR013320; IPR020635	GO:0004672,GO:0005524,GO:0006468,GO:0004672,GO:0006468,GO:0004674,GO:0006468,GO:0004713,GO:0006468
MD10G1307900	47	25	6	5	1	0	3.50723	0.00435147	0.999965	RLK	G-type lectin S-receptor-like serine/threonine-protein kinase At1g11410	0.0	AT1G11410.1	S-locus lectin protein kinase family protein	0.0	IPR000719; IPR000742; IPR000858; IPR001245; IPR001480; IPR002290; IPR003609; IPR008271; IPR011009; IPR013227; IPR013320; IPR017441; IPR020635	GO:0005524,GO:0004672,GO:0005524,GO:0006468,GO:0004672,GO:0006468,GO:0004674,GO:0006468,GO:0048544,GO:0005515,GO:0004713,GO:0006468
MD05G1263100	69	30	27	12	14	3	1.92532	0.00981507	0.999965	RLK	G-type lectin S-receptor-like serine/threonine-protein kinase At1g11410	0.0	AT1G11410.1	S-locus lectin protein kinase family protein	0.0	IPR000719; IPR000742; IPR000858; IPR001245; IPR001480; IPR002290; IPR003609; IPR008271; IPR011009; IPR013227; IPR017441; IPR020635	GO:0005524,GO:0004672,GO:0005524,GO:0006468,GO:0004672,GO:0006468,GO:0004674,GO:0006468,GO:0048544,GO:0005515,GO:0004713,GO:0006468
MD05G1334000	1022	1180	922	618	648	283	0.731267	0.0195417	0.999965	RLK	G-type lectin S-receptor-like serine/threonine-protein kinase At1g11410	0.0	AT1G11410.1	S-locus lectin protein kinase family protein	0.0	IPR000719; IPR000742; IPR000858; IPR001245; IPR001480; IPR002290; IPR003609; IPR008271; IPR011009; IPR013227; IPR013320; IPR017441; IPR020635; IPR021820	GO:0005524,GO:0004672,GO:0005524,GO:0006468,GO:0004672,GO:0006468,GO:0004674,GO:0006468,GO:0048544,GO:0005515,GO:0004674,GO:0004713,GO:0006468
MD02G1047500	15	6	8	1	0	0	4.46394	0.00730788	0.999965	RLK	G-type lectin S-receptor-like serine/threonine-protein kinase At1g67520	5e-174	AT4G21390.1	S-locus lectin protein kinase family protein	3e-168	IPR000719; IPR000858; IPR001245; IPR001480; IPR002290; IPR008271; IPR011009; IPR013227; IPR013320; IPR020635	GO:0004672,GO:0005524,GO:0006468,GO:0004672,GO:0006468,GO:0004674,GO:0006468,GO:0048544,GO:0004713,GO:0006468
MD05G1226600	774	824	1528	514	461	375	0.811273	0.00139899	0.888422	RLK	G-type lectin S-receptor-like serine/threonine-protein kinase At1g67520	8e-124	AT5G60900.1	receptor-like protein kinase 1	7e-129	IPR000719; IPR000742; IPR001245; IPR001480; IPR002290; IPR008271; IPR011009; IPR013320; IPR020635	GO:0004672,GO:0005524,GO:0006468,GO:0004672,GO:0006468,GO:0004674,GO:0006468,GO:0005515,GO:0004713,GO:0006468
MD05G1226700	1102	1005	1687	677	778	495	0.603464	0.00372321	0.999965	RLK	G-type lectin S-receptor-like serine/threonine-protein kinase At1g67520	6e-123	AT5G60900.1	receptor-like protein kinase 1	9e-131	IPR000719; IPR000742; IPR001245; IPR001480; IPR002290; IPR008271; IPR011009; IPR013320; IPR020635	GO:0004672,GO:0005524,GO:0006468,GO:0004672,GO:0006468,GO:0004674,GO:0006468,GO:0005515,GO:0004713,GO:0006468
MD09G1094800	25	22	32	9	4	3	1.94716	0.00723948	0.999965	RLK	G-type lectin S-receptor-like serine/threonine-protein kinase At2g19130	3e-150	AT2G19130.1	S-locus lectin protein kinase family protein	2e-151	IPR000719; IPR000858; IPR001245; IPR001480; IPR003609; IPR011009; IPR013227; IPR013320	GO:0004672,GO:0005524,GO:0006468,GO:0004672,GO:0006468,GO:0048544
MD05G1329600	50	35	77	9	13	26	1.30309	0.034691	0.999965	RLK	G-type lectin S-receptor-like serine/threonine-protein kinase B120	0.0	AT4G21390.1	S-locus lectin protein kinase family protein	0.0	IPR000719; IPR000742; IPR000858; IPR001245; IPR001480; IPR002290; IPR003609; IPR008271; IPR011009; IPR013227; IPR013320; IPR017441; IPR020635	GO:0005524,GO:0004672,GO:0005524,GO:0006468,GO:0004672,GO:0006468,GO:0004674,GO:0006468,GO:0048544,GO:0005515,GO:0004713,GO:0006468
MD09G1096000	73	95	93	40	59	24	0.778491	0.036997	0.999965	RLK	G-type lectin S-receptor-like serine/threonine-protein kinase B120	0.0	AT4G21390.1	S-locus lectin protein kinase family protein	0.0	IPR000719; IPR000858; IPR001245; IPR001480; IPR002290; IPR003609; IPR008271; IPR011009; IPR013227; IPR013320; IPR020635	GO:0004672,GO:0005524,GO:0006468,GO:0004672,GO:0006468,GO:0004674,GO:0006468,GO:0048544,GO:0004713,GO:0006468
MD03G1022000	55	41	14	13	4	0	2.48827	0.0170338	0.999965	RLK	G-type lectin S-receptor-like serine/threonine-protein kinase LECRK3	0.0	AT5G60900.1	receptor-like protein kinase 1	0.0	IPR000719; IPR001480; IPR002290; IPR008271; IPR011009; IPR013320; IPR017441; IPR020635	GO:0005524,GO:0004672,GO:0005524,GO:0006468,GO:0004674,GO:0006468,GO:0004713,GO:0006468
MD10G1307600	29	20	13	3	4	2	2.53116	0.00441936	0.999965	RLK	G-type lectin S-receptor-like serine/threonine-protein kinase RKS1	0.0	AT1G11340.1	S-locus lectin protein kinase family protein	0.0	IPR000719; IPR000858; IPR001245; IPR001480; IPR002290; IPR003609; IPR008271; IPR011009; IPR013227; IPR013320; IPR017441; IPR020635	GO:0005524,GO:0004672,GO:0005524,GO:0006468,GO:0004672,GO:0006468,GO:0004674,GO:0006468,GO:0048544,GO:0004713,GO:0006468
MD10G1308000	95	77	45	29	24	10	1.53884	0.00717006	0.999965	RLK	G-type lectin S-receptor-like serine/threonine-protein kinase RKS1	0.0	AT1G11340.1	S-locus lectin protein kinase family protein	0.0	IPR000719; IPR000858; IPR001245; IPR001480; IPR002290; IPR003609; IPR008271; IPR011009; IPR013227; IPR013320; IPR017441; IPR020635	GO:0005524,GO:0004672,GO:0005524,GO:0006468,GO:0004672,GO:0006468,GO:0004674,GO:0006468,GO:0048544,GO:0004713,GO:0006468
MD17G1176800	17	14	24	4	3	3	2.08621	0.0111362	0.999965		Guanosine-5'-triphosphate,3'-diphosphate pyrophosphatase	0.057	AT4G08267.1	hAT transposon superfamily protein	3e-24	IPR007021; IPR012337	GO:0003676
MD14G1075400	21	5	13	1	0	1	3.94364	0.00689424	0.999965		Heat stress transcription factor B-3	2e-26	AT2G41690.1	heat shock transcription factor B3	9e-28	IPR027725	noGo
MD12G1079300	11	9	6	1	0	2	2.73414	0.0487965	0.999965		Heat stress transcription factor B-3	2e-66	AT2G41690.1	heat shock transcription factor B3	1e-67	IPR000232; IPR011991; IPR027709; IPR027725	GO:0003700,GO:0005634,GO:0009408,GO:0003700,GO:0005634,GO:0043565
MD09G1133200	26	14	20	1	3	5	2.38021	0.00960686	0.999965		Heavy metal-associated isoprenylated plant protein 16	2e-15	AT3G07600.1	Heavy metal transport/detoxification superfamily protein	1e-16	0	noGo
MD11G1039300	32	9	32	7	6	4	1.77075	0.0279205	0.999965		Heavy metal-associated isoprenylated plant protein 16	3e-12	AT3G07600.1	Heavy metal transport/detoxification superfamily protein	1e-13	IPR006121	GO:0030001,GO:0046872
MD16G1029900	433	137	753	121	70	141	1.51748	0.0064103	0.999965		Heavy metal-associated isoprenylated plant protein 20	8e-67	AT1G71050.1	Heavy metal transport/detoxification superfamily protein	4e-68	IPR006121	GO:0030001,GO:0046872
MD01G1209000	188	183	301	103	71	60	1.13974	0.000419724	0.487395		Heavy metal-associated isoprenylated plant protein 39	6e-25	AT1G01490.1	Heavy metal transport/detoxification superfamily protein	3e-26	IPR006121	GO:0030001,GO:0046872
MD01G1209100	190	242	236	78	147	100	0.70467	0.0171053	0.999965		Heavy metal-associated isoprenylated plant protein 39	2e-21	AT1G01490.1	Heavy metal transport/detoxification superfamily protein	9e-23	IPR006121	GO:0030001,GO:0046872
MD01G1209200	760	893	760	444	344	269	0.85763	0.00207241	0.999965		Heavy metal-associated isoprenylated plant protein 39	8e-21	AT1G01490.1	Heavy metal transport/detoxification superfamily protein	4e-22	IPR006121	GO:0030001,GO:0046872
MD06G1164900	50	11	38	7	8	8	1.7792	0.0206567	0.999965		High-affinity nitrate transporter 3.2	5e-59	AT5G50200.3	nitrate transmembrane transporters	2e-59	IPR016605	noGo
MD09G1126600	199	270	254	135	78	26	1.28474	0.00835834	0.999965		Homeobox protein ceh-14	3.1	AT4G13500.1	unknown protein; FUNCTIONS IN: molecular_function unknown; INVOLVED IN: biological_process unknown; LOCATED IN: chloroplast; BEST Arabidopsis thaliana protein match is: unknown protein (TAIR:AT2G05310.1); Has 50 Blast hits to 50 proteins in 20 species: Archae -0; Bacteria -0; Metazoa -0; Fungi -0; Plants -50; Viruses -0; Other Eukaryotes -0 (source: NCBI BLink).	2e-37	0	noGo
MD06G1103400	750	847	1269	406	704	157	0.894196	0.020274	0.999965		Hydroquinone glucosyltransferase	0.0	AT4G01070.1	UDP-Glycosyltransferase superfamily protein	0.0	IPR002213	GO:0008152
MD03G1069500	88412	123902	154854	70652	75932	49257	0.543059	0.00314804	0.999965		Isoflavonoid 7-O-beta-apiosyl-glucoside beta-glycosidase	0.0	AT5G44640.1	beta glucosidase 13	0.0	IPR001360; IPR013781; IPR017853; IPR018120	GO:0003824,GO:0005975,GO:0005975
MD13G1160500	1584	418	379	224	43	13	2.88932	0.0201473	0.999965		Isopentenyl-diphosphate Delta-isomerase	4.5	AT3G57540.1	Remorin family protein	3.5	0	noGo
MD01G1235200	23	12	16	0	1	0	5.25623	0.000434212	0.490083	LAC15	Laccase-15	0.0	AT5G48100.1	Laccase/Diphenol oxidase family protein	0.0	IPR001117; IPR002355; IPR008972; IPR011706; IPR011707; IPR017761	GO:0005507,GO:0005507,GO:0016491,GO:0055114,GO:0016491,GO:0055114,GO:0046274,GO:0048046,GO:0052716,GO:0055114
MD14G1229600	208	226	298	95	192	102	0.583803	0.0398467	0.999965		L-Ala-D/L-amino acid epimerase	0.0	AT3G18270.1	cytochrome P450, family 77, subfamily A, polypeptide 5 pseudogene	0.0	IPR001354; IPR013341; IPR013342	GO:0003824,GO:0008152
MD06G1094400	10	8	1	0	0	0	4.87657	0.02012	0.999965		Late embryogenesis abundant protein At1g64065	5e-14	AT2G46150.1	Late embryogenesis abundant (LEA) hydroxyproline-rich glycoprotein family	2e-20	IPR004864	noGo
MD14G1114000	17	6	8	0	1	0	4.5712	0.00593219	0.999965		Late embryogenesis abundant protein At1g64065	7e-24	AT2G46150.1	Late embryogenesis abundant (LEA) hydroxyproline-rich glycoprotein family	1e-27	IPR004864	noGo
MD14G1114100	12	10	1	0	1	0	4.19071	0.0272035	0.999965		Late embryogenesis abundant protein At1g64065	6e-16	AT2G46150.1	Late embryogenesis abundant (LEA) hydroxyproline-rich glycoprotein family	6e-23	IPR004864	noGo
MD06G1093600	38	21	6	1	2	1	3.82745	0.00128169	0.866524		Late embryogenesis abundant protein At1g64065	4e-14	AT2G46150.1	Late embryogenesis abundant (LEA) hydroxyproline-rich glycoprotein family	7e-19	IPR004864	noGo
MD14G1114600	21	4	5	0	3	0	3.25185	0.0455871	0.999965		Late embryogenesis abundant protein At1g64065	6e-14	AT2G46150.1	Late embryogenesis abundant (LEA) hydroxyproline-rich glycoprotein family	2e-16	IPR004864	noGo
MD06G1094200	26	19	28	1	7	1	2.7682	0.00219092	0.999965		Late embryogenesis abundant protein At1g64065	1e-12	AT2G46150.1	Late embryogenesis abundant (LEA) hydroxyproline-rich glycoprotein family	1e-15	IPR004864	noGo
MD06G1094500	54	42	23	5	12	1	2.55693	0.00168236	0.931416		Late embryogenesis abundant protein At1g64065	6e-15	AT2G46150.1	Late embryogenesis abundant (LEA) hydroxyproline-rich glycoprotein family	2e-21	IPR004864	noGo
MD06G1094700	18	8	17	3	3	1	2.31724	0.0202948	0.999965		Late embryogenesis abundant protein At1g64065	5e-14	AT2G46150.1	Late embryogenesis abundant (LEA) hydroxyproline-rich glycoprotein family	1e-56	IPR004864; IPR013783	noGo
MD06G1094300	108	136	58	23	62	6	1.57799	0.0205511	0.999965		Late embryogenesis abundant protein At1g64065	2e-15	AT2G46150.1	Late embryogenesis abundant (LEA) hydroxyproline-rich glycoprotein family	4e-21	IPR004864	noGo
MD01G1072100	217	149	110	51	96	26	1.26258	0.0115222	0.999965		Late embryogenesis abundant protein At1g64065	4e-22	AT2G46150.1	Late embryogenesis abundant (LEA) hydroxyproline-rich glycoprotein family	5e-79	IPR004864	noGo
MD02G1233600	13	4	4	0	0	0	5.00337	0.0102258	0.999965		LEAF RUST 10 DISEASE-RESISTANCE LOCUS RECEPTOR-LIKE PROTEIN KINASE-like 1.4	1.9	AT1G67025.1	BEST Arabidopsis thaliana protein match is: Protein kinase superfamily protein (TAIR:AT1G18390.1); Has 221 Blast hits to 191 proteins in 10 species: Archae -0; Bacteria -0; Metazoa -0; Fungi -0; Plants -221; Viruses -0; Other Eukaryotes -0 (source: NCBI BLink).	0.021	0	noGo
MD01G1232800	11	1	4	0	0	0	4.61029	0.036626	0.999965		Lecithin retinol acyltransferase	3e-07	AT5G16360.1	NC domain-containing protein-related	5e-46	IPR000064; IPR007053	noGo
MD07G1004500	5698	8402	19934	2458	5886	673	1.61224	0.00353875	0.999965	LOX	Linoleate 13S-lipoxygenase 2-1, chloroplastic	0.0	AT3G45140.1	lipoxygenase 2	0.0	IPR000907; IPR001246; IPR013819; IPR020833; IPR020834; IPR027433	GO:0005506,GO:0016165,GO:0055114,GO:0046872,GO:0055114
MD07G1004600	857	1550	3515	517	1107	108	1.46117	0.0135588	0.999965	LOX	Linoleate 13S-lipoxygenase 2-1, chloroplastic	1e-44	AT1G17420.1	lipoxygenase 3	8e-30	IPR000907; IPR001024; IPR008976	GO:0005515,GO:0046872,GO:0055114
MD07G1003600	492	633	228	204	237	93	1.11169	0.0175658	0.999965	LOX	Linoleate 13S-lipoxygenase 2-1, chloroplastic	0.0	AT3G45140.1	lipoxygenase 2	0.0	IPR000907; IPR001246; IPR013819; IPR020833	GO:0005506,GO:0016165,GO:0055114,GO:0046872,GO:0055114
MD13G1126300	108	88	109	55	53	33	0.790598	0.0259765	0.999965		Lipopolysaccharide-induced tumor necrosis factor-alpha factor homolog	0.002	AT5G13190.1	CONTAINS InterPro DOMAIN/s: LPS-induced tumor necrosis factor alpha factor (InterPro:IPR006629); Has 30201 Blast hits to 17322 proteins in 780 species: Archae -12; Bacteria -1396; Metazoa -17338; Fungi -3422; Plants -5037; Viruses -0; Other Eukaryotes -2996 (source: NCBI BLink).	1e-66	IPR006629	noGo
MD03G1111600	39	24	13	5	4	3	2.40902	0.0047251	0.999965		LOB domain-containing protein 1	6e-76	AT1G07900.1	LOB domain-containing protein 1	4e-77	IPR004883	noGo
MD10G1228000	45	25	74	16	23	13	1.10776	0.0403613	0.999965	RLK	LRR receptor-like serine/threonine-protein kinase GSO1	1e-76	AT2G34930.1	disease resistance family protein / LRR family protein	0.0	IPR001611; IPR003591; IPR013210	GO:0005515
MD14G1237000	1757	1961	2380	1126	1322	856	0.541017	0.000639463	0.590675		L-threonate dehydrogenase	5e-76	AT1G18270.3	ketose-bisphosphate aldolase class-II family protein	0.0	IPR000771; IPR002204; IPR006115; IPR008927; IPR010737; IPR013328; IPR013785; IPR015815; IPR016040	GO:0016491,GO:0050662,GO:0055114,GO:0003824,GO:0005975,GO:0008270,GO:0016832,GO:0006573,GO:0008442,GO:0055114,GO:0055114,GO:0016491,GO:0055114,GO:0004616,GO:0006098,GO:0055114
MD12G1147500	14	5	1	0	1	0	4.02098	0.0406668	0.999965	RLK	L-type lectin-domain containing receptor kinase IV.1	0.0	AT2G37710.1	receptor lectin kinase	0.0	IPR000719; IPR001220; IPR002290; IPR008271; IPR008985; IPR011009; IPR013320; IPR017441; IPR020635	GO:0005524,GO:0004672,GO:0005524,GO:0006468,GO:0004674,GO:0006468,GO:0004713,GO:0006468,GO:0030246
MD09G1016300	141	106	104	68	45	23	1.07987	0.0201719	0.999965		Lysine histidine transporter 1	0.0	AT5G40780.1	lysine histidine transporter 1	0.0	IPR013057	noGo
MD09G1016600	693	593	763	317	204	363	0.802878	0.0269036	0.999965		Lysine histidine transporter 1	0.0	AT5G40780.1	lysine histidine transporter 1	0.0	IPR013057	noGo
MD08G1004100	236	80	73	19	9	0	3.62033	4.25226e-05	0.159715		Lysine histidine transporter-like 8	0.0	AT1G47670.1	Transmembrane amino acid transporter family protein	0.0	IPR013057	noGo
MD05G1351500	3	1	22	1	0	0	4.06234	0.0396039	0.999965	RLK	LysM domain receptor-like kinase 3	0.0	AT3G21630.1	chitin elicitor receptor kinase 1	0.0	IPR000719; IPR002290; IPR008271; IPR011009; IPR013320; IPR017441; IPR020635	GO:0004672,GO:0005524,GO:0006468,GO:0004674,GO:0006468,GO:0005524,GO:0004713,GO:0006468
MD10G1290300	103	103	127	51	39	53	0.829904	0.0255267	0.999965		MACPF domain-containing protein NSL1	0.0	AT1G28380.1	MAC/Perforin domain-containing protein	0.0	IPR020864	noGo
MD07G1123600	291	298	384	164	165	144	0.675505	0.00339706	0.999965		MADS-box protein SOC1	3e-86	AT2G45660.1	AGAMOUS-like 20	2e-87	IPR002100; IPR002487	GO:0003677,GO:0046983,GO:0003700,GO:0005634
MD09G1118200	3	3	92	3	4	0	3.32387	0.0194346	0.999965		Magnesium-chelatase subunit ChlH, chloroplastic	0.0	AT5G13630.1	magnesium-chelatase subunit chlH, chloroplast, putative / Mg-protoporphyrin IX chelatase, putative (CHLH)	0.0	IPR003672; IPR022571	GO:0009058,GO:0016851
MD13G1160600	658	167	92	66	21	7	3.12202	0.00835625	0.999965	PR-10	Major allergen Mal d 1	1e-71	AT1G24020.1	MLP-like protein 423	2e-07	IPR000916; IPR023393; IPR024949	GO:0006952,GO:0009607
MD16G1161100	1434	401	164	163	58	10	2.97114	0.0203516	0.999965	PR-10	Major allergen Mal d 1	1e-83	AT1G24020.1	MLP-like protein 423	3e-12	IPR000916; IPR023393; IPR024949	GO:0006952,GO:0009607
MD13G1161400	19415	6917	4582	3494	3428	461	1.94042	0.0393229	0.999965	PR-10	Major allergen Mal d 1	3e-110	AT1G24020.1	MLP-like protein 423	7e-10	IPR000916; IPR023393; IPR024949	GO:0006952,GO:0009607
MD13G1160900	54	6	4	2	1	0	4.29409	0.00390685	0.999965	PR-10 (qPCR)	Major allergen Mal d 1	2e-83	AT1G24020.1	MLP-like protein 423	9e-11	IPR000916; IPR023393; IPR024949	GO:0006952,GO:0009607
MD13G1161100	478	232	75	43	47	2	2.9985	0.0140984	0.999965	PR-10 (qPCR)	Major allergen Mal d 1	1e-84	AT1G24020.1	MLP-like protein 423	2e-10	IPR000916; IPR023393; IPR024949	GO:0006952,GO:0009607
MD16G1160300	144	6	23	16	5	0	2.91054	0.0201143	0.999965	PR-10	Major allergen Pru ar 1	1e-92	AT1G24020.1	MLP-like protein 423	4e-12	IPR000916; IPR023393; IPR024949	GO:0006952,GO:0009607
MD13G1161200	76	24	10	8	1	1	3.25168	0.00337879	0.999965	PR-10	Major allergen Pru av 1	1e-80	AT1G24020.1	MLP-like protein 423	2e-09	IPR000916; IPR023393; IPR024949	GO:0006952,GO:0009607
MD13G1160700	606	91	46	53	21	5	3.11277	0.0202317	0.999965	PR-10	Major allergen Pru av 1	6e-87	AT1G24020.1	MLP-like protein 423	1e-12	IPR000916; IPR023393; IPR024949	GO:0006952,GO:0009607
MD06G1074900	71	77	199	44	64	34	0.892843	0.0353981	0.999965		Maspardin	2e-29	AT4G12230.1	alpha/beta-Hydrolases superfamily protein	5e-88	IPR026151	noGo
MD00G1124700	1	6	16	0	0	0	4.87533	0.0188561	0.999965	RLK	MDIS1-interacting receptor like kinase 2	0.0	AT4G08850.1	Leucine-rich repeat receptor-like protein kinase family protein	0.0	IPR000719; IPR001611; IPR002290; IPR003591; IPR008266; IPR011009; IPR013320; IPR017441; IPR020635	GO:0005524,GO:0004672,GO:0005524,GO:0006468,GO:0004713,GO:0006468,GO:0005515
MD10G1215200	113	32	2	14	1	0	3.13829	0.0261477	0.999965	RLK	MDIS1-interacting receptor like kinase 2	0.0	AT4G08850.1	Leucine-rich repeat receptor-like protein kinase family protein	0.0	IPR000719; IPR001611; IPR002290; IPR003591; IPR008266; IPR011009; IPR013210; IPR013320; IPR017441; IPR020635	GO:0005524,GO:0004672,GO:0005524,GO:0006468,GO:0004713,GO:0006468,GO:0005515
MD17G1153200	72	31	35	14	11	6	1.8975	0.00438481	0.999965	RLK	MDIS1-interacting receptor like kinase 2	0.0	AT4G08850.1	Leucine-rich repeat receptor-like protein kinase family protein	0.0	IPR000719; IPR001611; IPR002290; IPR003591; IPR008266; IPR011009; IPR013210; IPR013320; IPR017441; IPR020635; IPR025875	GO:0005524,GO:0004672,GO:0005524,GO:0006468,GO:0004713,GO:0006468,GO:0005515
MD00G1170700	54	28	59	13	12	16	1.40237	0.0131929	0.999965	RLK	MDIS1-interacting receptor like kinase 2	1e-164	AT4G08850.1	Leucine-rich repeat receptor-like protein kinase family protein	6e-166	IPR000719; IPR001611; IPR002290; IPR003591; IPR008266; IPR011009; IPR013320; IPR017441; IPR020635	GO:0005524,GO:0004672,GO:0005524,GO:0006468,GO:0004713,GO:0006468,GO:0005515
MD15G1052100	519	613	833	257	431	299	0.632531	0.00555779	0.999965		Mechanosensitive ion channel protein 10	0.0	AT5G12080.1	mechanosensitive channel of small conductance-like 10	0.0	IPR002048; IPR006685; IPR010920; IPR016688	GO:0005509,GO:0016020,GO:0055085
MD03G1031700	616	768	1077	358	554	427	0.500141	0.0288602	0.999965		Mediator of RNA polymerase II transcription subunit 15a	2e-33	AT1G15790.1	unknown protein; BEST Arabidopsis thaliana protein match is: unknown protein (TAIR:AT1G15780.1); Has 170 Blast hits to 94 proteins in 14 species: Archae -0; Bacteria -0; Metazoa -0; Fungi -0; Plants -170; Viruses -0; Other Eukaryotes -0 (source: NCBI BLink).	4e-49	IPR003101	GO:0003712
MD01G1098700	21	5	2	0	0	0	5.476	0.00512754	0.999965		Metalloendoproteinase 2-MMP	9e-79	AT1G70170.1	matrix metalloproteinase	5e-80	IPR001818; IPR002477; IPR006026; IPR021158; IPR021190; IPR024079	GO:0004222,GO:0006508,GO:0008270,GO:0031012,GO:0008237,GO:0006508,GO:0008237,GO:0008270
MD09G1040400	12	8	3	0	0	0	5.13081	0.00679617	0.999965		Metalloendoproteinase 2-MMP	5e-83	AT1G70170.1	matrix metalloproteinase	3e-84	IPR001818; IPR002477; IPR006026; IPR021158; IPR021190; IPR024079	GO:0004222,GO:0006508,GO:0008270,GO:0031012,GO:0008237,GO:0006508,GO:0008237,GO:0008270
MD11G1246800	17810	35790	21439	3905	7568	5473	1.81549	8.9938e-08	0.00182767		Metallothionein-like protein type 3	1e-33	AT3G15353.1	metallothionein 3	6e-18	0	noGo
MD03G1227500	794	1439	1202	641	540	447	0.71147	0.00914082	0.999965		Metallothionein-like protein type 3	1e-40	AT3G15353.1	metallothionein 3	2e-16	0	noGo
MD02G1162800	84	54	19	12	14	3	2.2678	0.00384942	0.999965		Methylesterase 3	2e-67	AT2G23610.1	methyl esterase 3	9e-69	0	noGo
MD14G1149200	31	16	27	4	4	7	1.93322	0.0118419	0.999965		Mitochondrial phosphate carrier protein 2, mitochondrial	0.0	AT3G48850.1	phosphate transporter 3;2	0.0	IPR018108; IPR023395	noGo
MD12G1178600	17	103	48	3	20	14	1.83015	0.0236853	0.999965		Mitoferrin	1e-63	AT1G07030.1	Mitochondrial substrate carrier family protein	9e-157	IPR002067; IPR018108; IPR023395	GO:0055085
MD02G1001300	155	42	20	33	13	1	2.06733	0.0414428	0.999965		MLO-like protein 1	0.0	AT4G02600.1	Seven transmembrane MLO family protein	0.0	IPR004326	GO:0006952,GO:0016021
MD12G1121200	20	7	6	0	0	0	5.65595	0.00125884	0.866524		MLO-like protein 3	5e-174	AT3G45290.1	Seven transmembrane MLO family protein	3e-175	IPR004326	GO:0006952,GO:0016021
MD03G1115500	50	15	25	4	10	7	1.838	0.0196443	0.999965		MLO-like protein 6	0.0	AT1G61560.1	Seven transmembrane MLO family protein	0.0	IPR004326	GO:0006952,GO:0016021
MD07G1009600	20	8	4	1	0	1	3.71926	0.0158311	0.999965		NA	NA	AT1G68238.1	unknown protein; FUNCTIONS IN: molecular_function unknown; INVOLVED IN: biological_process unknown; LOCATED IN: endomembrane system; Has 30201 Blast hits to 17322 proteins in 780 species: Archae -12; Bacteria -1396; Metazoa -17338; Fungi -3422; Plants -5037; Viruses -0; Other Eukaryotes -2996 (source: NCBI BLink).	0.37	0	noGo
MD05G1011000	447	388	360	193	200	93	1.01902	0.00210018	0.999965		NA	NA	AT1G31130.1	unknown protein; FUNCTIONS IN: molecular_function unknown; INVOLVED IN: biological_process unknown; LOCATED IN: cellular_component unknown; EXPRESSED IN: 23 plant structures; EXPRESSED DURING: 13 growth stages; BEST Arabidopsis thaliana protein match is: unknown protein (TAIR:AT4G19950.1); Has 246 Blast hits to 244 proteins in 29 species: Archae -2; Bacteria -16; Metazoa -0; Fungi -0; Plants -222…	4e-66	0	noGo
MD02G1109900	62	90	77	21	56	22	0.920798	0.0416111	0.999965		NA	NA	AT5G49810.1	methionine S-methyltransferase	1.9	0	noGo
MD10G1133400	71	74	91	40	42	13	1.00886	0.0234586	0.999965		NAC domain-containing protein 35	2e-58	AT2G17040.1	NAC domain containing protein 36	2e-114	IPR003441	GO:0003677
MD06G1160500	17	26	10	0	7	0	2.80258	0.0317166	0.999965		NAD kinase	3.5	AT3G08550.1	elongation defective 1 protein / ELD1 protein	0.27	0	noGo
MD10G1298100	991	1445	959	653	639	504	0.589582	0.0362884	0.999965		NAD(P)H-quinone oxidoreductase subunit 6, chloroplastic	6.6	AT3G61270.1	Arabidopsis thaliana protein of unknown function (DUF821)	0.34	0	noGo
MD15G1141200	9	14	0	0	0	0	5.14223	0.0300517	0.999965		NADH-quinone oxidoreductase subunit N	0.78	AT1G29760.1	Putative adipose-regulatory protein (Seipin)	0.67	#N/A	#N/A
MD06G1179400	51	75	32	7	30	1	1.92219	0.0252801	0.999965		NADPH--cytochrome P450 reductase	0.27	AT1G29025.1	Calcium-binding EF-hand family protein	0.006	IPR015916	noGo
MD12G1232800	550	282	800	82	238	40	1.93053	0.000213768	0.335555		NDR1/HIN1-like protein 10	0.38	AT2G35980.1	Late embryogenesis abundant (LEA) hydroxyproline-rich glycoprotein family	0.021	0	noGo
MD09G1187500	14	8	11	2	2	2	2.13369	0.0418864	0.999965		NDR1/HIN1-like protein 6	6e-87	AT5G36970.1	NDR1/HIN1-like 25	2e-88	IPR004864	noGo
MD07G1153100	0	38	0	0	0	0	5.78656	0.0394321	0.999965		Negative regulator of flagellin synthesis	0.67	AT3G19100.1	Protein kinase superfamily protein	1.6	0	noGo
MD05G1261800	141	118	139	59	80	55	0.713182	0.0233702	0.999965		Nicotinamide/nicotinic acid mononucleotide adenylyltransferase	8e-115	AT5G55810.2	nicotinate/nicotinamide mononucleotide adenyltransferase	3e-79	IPR004821; IPR005248; IPR014729	GO:0009435,GO:0016779,GO:0003824,GO:0009058
MD05G1252900	25	12	4	0	1	0	5.02933	0.00256328	0.999965		Nipped-B-like protein B	0.091	AT1G56060.1	unknown protein; BEST Arabidopsis thaliana protein match is: unknown protein (TAIR:AT2G32210.1); Has 180 Blast hits to 180 proteins in 22 species: Archae -0; Bacteria -0; Metazoa -0; Fungi -10; Plants -170; Viruses -0; Other Eukaryotes -0 (source: NCBI BLink).	5e-05	0	noGo
MD07G1239700	243	123	57	29	34	15	2.25034	0.000322481	0.451952	LTP	Non-specific lipid-transfer protein 2P	0.078	AT4G33550.1	Bifunctional inhibitor/lipid-transfer protein/seed storage 2S albumin superfamily protein	7e-09	IPR016140	noGo
MD07G1239800	47	18	19	5	7	0	2.64552	0.00680392	0.999965	LTP	Non-specific lipid-transfer protein 2P	0.14	AT4G33550.1	Bifunctional inhibitor/lipid-transfer protein/seed storage 2S albumin superfamily protein	3e-08	IPR016140	#N/A
MD06G1126100	25	36	31	7	18	1	1.59894	0.0432425	0.999965		Nuclear pore complex protein NUP98A	3e-24	AT1G10390.1	Nucleoporin autopeptidase	2e-25	0	noGo
MD16G1019500	67	78	80	17	22	26	1.419	0.00100713	0.8026		Nudix hydrolase 17, mitochondrial	5e-89	AT2G01670.1	nudix hydrolase homolog 17	3e-90	IPR000086; IPR015797; IPR020084	GO:0016787
MD09G1127900	36	14	40	5	11	5	1.78932	0.0132893	0.999965		Nudix hydrolase 2	4e-112	AT5G47650.1	nudix hydrolase homolog 2	2e-113	IPR000086; IPR003293; IPR015797; IPR020084	GO:0016787
MD10G1148900	35	61	99	30	30	16	0.971122	0.0377903	0.999965		p21-activated protein kinase-interacting protein 1-like	8e-06	AT5G24710.1	Transducin/WD40 repeat-like superfamily protein	1e-143	IPR001680; IPR015943; IPR017986; IPR019775	GO:0005515
MD02G1168100	188	113	283	83	62	84	0.930777	0.0228546	0.999965		Patatin-like protein 2	1e-149	AT2G26560.1	phospholipase A 2A	8e-151	IPR002641; IPR016035	GO:0006629,GO:0008152
MD05G1109100	1421	305	445	189	139	30	2.43607	0.00036042	0.463102	PR-1 (qPCR)	Pathogenesis-related protein 1	7e-70	AT4G33720.1	CAP (Cysteine-rich secretory proteins, Antigen 5, and Pathogenesis-related 1 protein) superfamily protein	3e-73	IPR001283; IPR014044; IPR018244	GO:0005576
MD04G1225400	232	77	79	24	47	12	2.06696	0.00123654	0.866524	PR-4 (qPCR)	Pathogenesis-related protein PR-4B	9e-72	AT3G04720.1	pathogenesis-related 4	4e-72	IPR001153; IPR009009; IPR014733; IPR018226	GO:0042742,GO:0050832
MD08G1205300	457	360	230	59	217	54	1.49583	0.00420035	0.999965	PAE	Pectin acetylesterase 8	0.0	AT4G19420.1	Pectinacetylesterase family protein	0.0	IPR004963	noGo
MD12G1122000	3	6	11	0	0	0	4.74205	0.015303	0.999965		Pentatricopeptide repeat-containing protein At3g24000, mitochondrial	2e-39	AT3G24000.1	Tetratricopeptide repeat (TPR)-like superfamily protein	9e-41	IPR002885	noGo
MD04G1134800	3	11	5	0	1	0	3.78612	0.0396364	0.999965		Pentatricopeptide repeat-containing protein At3g24000, mitochondrial	8e-49	AT3G24000.1	Tetratricopeptide repeat (TPR)-like superfamily protein	4e-50	IPR002885	noGo
MD03G1014200	106	60	12	5	5	0	4.02586	8.47325e-05	0.220159	POX	Peroxidase 15	6e-145	AT5G06720.1	peroxidase 2	1e-144	IPR000823; IPR002016; IPR010255; IPR019793; IPR019794	GO:0004601,GO:0055114,GO:0004601,GO:0006979,GO:0020037,GO:0055114
MD03G1014400	292	259	46	33	18	0	3.39903	0.0293547	0.999965	POX	Peroxidase 15	3e-144	AT5G06720.1	peroxidase 2	2e-142	IPR000823; IPR002016; IPR010255; IPR019793; IPR019794	GO:0004601,GO:0055114,GO:0004601,GO:0006979,GO:0020037,GO:0055114
MD11G1015300	65	88	37	17	7	3	2.53713	0.000354291	0.463102	POX	Peroxidase 15	8e-144	AT5G06720.1	peroxidase 2	1e-143	IPR000823; IPR002016; IPR010255; IPR019793; IPR019794	GO:0004601,GO:0055114,GO:0004601,GO:0006979,GO:0020037,GO:0055114
MD17G1092400	230	60	21	47	17	13	1.83282	0.0348906	0.999965	POX	Peroxidase 3	2e-165	AT1G05260.1	Peroxidase superfamily protein	1e-166	IPR000823; IPR002016; IPR010255; IPR019793; IPR019794	GO:0004601,GO:0055114,GO:0004601,GO:0006979,GO:0020037,GO:0055114
MD01G1162100	1477	909	702	485	502	153	1.22922	0.00838298	0.999965	POX	Peroxidase 4	2e-139	AT5G05340.1	Peroxidase superfamily protein	6e-135	IPR000823; IPR002016; IPR010255; IPR019793; IPR019794	GO:0004601,GO:0055114,GO:0004601,GO:0006979,GO:0020037,GO:0055114
MD02G1124700	388	380	174	102	139	44	1.51604	0.00161231	0.931416	POX	Peroxidase 64	1e-162	AT5G42180.1	Peroxidase superfamily protein	7e-164	IPR000823; IPR002016; IPR010255; IPR019793	GO:0004601,GO:0006979,GO:0020037,GO:0055114
MD12G1238500	23	2	2	0	0	0	5.44351	0.00839598	0.999965	RhaT	PGL/p-HBAD biosynthesis rhamnosyltransferase	0.35	AT4G14746.1	CONTAINS InterPro DOMAIN/s: EGF-like (InterPro:IPR006210); Has 259 Blast hits to 234 proteins in 55 species: Archae -0; Bacteria -0; Metazoa -184; Fungi -0; Plants -69; Viruses -0; Other Eukaryotes -6 (source: NCBI BLink).	2e-34	0	noGo
MD09G1067500	112	293	359	99	77	71	1.20344	0.00259523	0.999965		Phenolic glucoside malonyltransferase 2	2e-99	AT5G39090.1	HXXXD-type acyl-transferase family protein	3e-101	IPR003480; IPR023213	noGo
MD00G1081300	7	6	6	0	0	1	3.81355	0.0302121	0.999965		Phosphate transporter PHO1 homolog 3	0.0	AT1G14040.1	EXS (ERD1/XPR1/SYG1) family protein	0.0	IPR004331; IPR004342	GO:0016021
MD02G1093300	51	73	67	29	31	13	1.07029	0.0150344	0.999965		Phosphatidylserine decarboxylase proenzyme	1.7	AT5G48560.1	basic helix-loop-helix (bHLH) DNA-binding superfamily protein	0.18	0	noGo
MD15G1280400	94	73	41	14	34	13	1.55592	0.00780985	0.999965		Phosphoglycerate mutase-like protein 4	4e-91	AT3G50520.1	Phosphoglycerate mutase family protein	2e-92	IPR001345; IPR003094; IPR013078	GO:0003824,GO:0008152,GO:0003824,GO:0005524
MD12G1171000	2	86	220	25	4	7	2.53791	0.0193593	0.999965		Phosphoinositide phosphatase SAC8	2e-29	AT3G51830.1	SAC domain-containing protein 8	1e-30	0	noGo
MD12G1171100	21	155	353	59	21	11	2.05104	0.0107583	0.999965		Phosphoinositide phosphatase SAC8	2e-53	AT3G51830.1	SAC domain-containing protein 8	1e-54	IPR002013	GO:0042578
MD12G1171200	49	130	256	47	25	50	1.31003	0.0216439	0.999965		Phosphoinositide phosphatase SAC8	3e-46	AT3G51830.1	SAC domain-containing protein 8	2e-47	IPR002013	GO:0042578
MD06G1050100	82	81	161	42	39	42	0.981948	0.0102142	0.999965		Phospholipase A1-Ibeta2, chloroplastic	0.0	AT4G16820.1	alpha/beta-Hydrolases superfamily protein	0.0	IPR002921	GO:0004806,GO:0006629
MD04G1069600	128	123	178	70	83	61	0.646425	0.0200913	0.999965		Phospholipase D beta 1	0.0	AT2G42010.1	phospholipase D beta 1	0.0	IPR000008; IPR001736; IPR008973; IPR011402; IPR015679; IPR018029; IPR024632	GO:0004630,GO:0005509,GO:0016020,GO:0046470,GO:0003824,GO:0008152,GO:0005515
MD04G1197500	268	170	515	76	135	144	0.992551	0.0214537	0.999965		Phospholipase D zeta 1	0.0	AT3G16785.1	phospholipase D P1	0.0	IPR001736; IPR001849; IPR011993; IPR015679; IPR016555; IPR025202	GO:0003824,GO:0008152,GO:0005515,GO:0005543
MD07G1174200	88	112	62	18	42	28	1.28382	0.00867378	0.999965		Phosphomannomutase/phosphoglucomutase	2e-08	AT5G17530.3	phosphoglucosamine mutase family protein	2e-78	IPR005841; IPR005845; IPR016055	GO:0005975
MD06G1157900	107	126	183	67	102	42	0.64825	0.0457694	0.999965		Phosphopantothenoylcysteine decarboxylase	4e-119	AT3G18030.1	HAL3-like protein A	2e-120	IPR003382	GO:0003824
MD03G1101700	9	11	21	0	2	3	2.59793	0.0232888	0.999965		Phycobilisome 8.9 kDa linker polypeptide, phycocyanin-associated, rod	3.2	AT5G41190.1	CONTAINS InterPro DOMAIN/s: Nin one binding (NOB1) Zn-ribbon like (InterPro:IPR014881), D-site 20S pre-rRNA nuclease (InterPro:IPR017117); Has 1807 Blast hits to 1807 proteins in 277 species: Archae -0; Bacteria -0; Metazoa -736; Fungi -347; Plants -385; Viruses -0; Other Eukaryotes -339 (source: NCBI BLink).	1.4	0	noGo
MD15G1066300	81	56	60	19	34	7	1.48747	0.00803288	0.999965		Phytosulfokines 3	2e-15	AT3G49780.1	phytosulfokine 4 precursor	1e-16	IPR009438	GO:0005576,GO:0008083,GO:0008283
MD07G1044900	11	14	60	7	8	5	1.62362	0.0459306	0.999965		Piezo-type mechanosensitive ion channel component	1.5	AT2G20142.1	Toll-Interleukin-Resistance (TIR) domain family protein	4e-15	0	noGo
MD12G1021000	8	4	19	1	1	2	2.49202	0.0469667	0.999965		Pleiotropic drug resistance protein 2	0.0	AT1G66950.1	pleiotropic drug resistance 11	0.0	IPR003439; IPR003593; IPR013525; IPR013581; IPR027417	GO:0000166,GO:0017111,GO:0005524,GO:0016887,GO:0016020
MD11G1159100	105	11	36	14	7	12	1.91897	0.0279173	0.999965		Pleiotropic drug resistance protein 2	0.0	AT2G36380.1	pleiotropic drug resistance 6	0.0	IPR003439; IPR003593; IPR013525; IPR013581; IPR027417	GO:0000166,GO:0017111,GO:0005524,GO:0016887,GO:0016020
MD02G1254900	2152	2382	3973	1494	1129	1341	0.676969	0.0141251	0.999965		Pleiotropic drug resistance protein 2	0.0	AT1G66950.1	pleiotropic drug resistance 11	0.0	IPR003439; IPR003593; IPR013525; IPR013581; IPR027417	GO:0000166,GO:0017111,GO:0005524,GO:0016887,GO:0016020
MD05G1069700	1362	1885	1903	735	1217	669	0.649408	0.00270538	0.999965		Polyol transporter 5	0.0	AT3G18830.1	polyol/monosaccharide transporter 5	0.0	IPR003663; IPR005828; IPR005829; IPR016196; IPR020846	GO:0005215,GO:0006810,GO:0016020,GO:0055085,GO:0016021,GO:0022857,GO:0055085,GO:0016020,GO:0022891,GO:0055085
MD05G1319300	11	8	13	0	3	0	3.18656	0.0254452	0.999965	PPO	Polyphenol oxidase, chloroplastic	0.0	AT4G24265.1	unknown protein; Has 3 Blast hits to 3 proteins in 2 species: Archae -0; Bacteria -0; Metazoa -0; Fungi -0; Plants -3; Viruses -0; Other Eukaryotes -0 (source: NCBI BLink).	1.6	IPR002227; IPR008922; IPR016213; IPR022739; IPR022740	GO:0008152,GO:0016491,GO:0004097,GO:0055114,GO:0004097,GO:0046148,GO:0055114
MD05G1319800	260	129	240	124	90	21	1.15044	0.0372336	0.999965	PPO	Polyphenol oxidase, chloroplastic	0.0	AT5G25610.1	BURP domain-containing protein	0.71	IPR002227; IPR008922; IPR016213; IPR022739; IPR022740	GO:0008152,GO:0016491,GO:0004097,GO:0055114,GO:0004097,GO:0046148,GO:0055114
MD15G1307600	14	7	18	0	0	0	5.77388	0.000382555	0.471157		Porphobilinogen deaminase	0.15	AT2G22990.3	sinapoylglucose 1	0.9	0	noGo
MD02G1037900	22	22	70	10	7	12	1.48771	0.0294873	0.999965		Potassium channel AKT1	0.0	AT2G26650.1	K+ transporter 1	0.0	IPR000595; IPR002110; IPR003938; IPR005821; IPR014710; IPR018490; IPR020683; IPR021789	GO:0005216,GO:0006811,GO:0016020,GO:0055085,GO:0005249,GO:0006813,GO:0016020,GO:0005515
MD02G1218900	119	85	27	19	17	0	2.54476	0.00680239	0.999965		PRA1 family protein F4	1e-07	AT3G13710.1	prenylated RAB acceptor 1.F4	8e-09	IPR004895	noGo
MD01G1041300	46	30	24	6	13	3	1.97198	0.00661431	0.999965		Probable 1-deoxy-D-xylulose-5-phosphate synthase 2, chloroplastic	0.0	AT4G15560.1	Deoxyxylulose-5-phosphate synthase	0.0	IPR005475; IPR005476; IPR005477; IPR009014; IPR015941; IPR020826	GO:0003824,GO:0008152,GO:0008661,GO:0016114
MD05G1074200	21	33	38	10	15	5	1.28904	0.0316612	0.999965		Probable 2-oxoglutarate-dependent dioxygenase At5g05600	5e-57	AT3G19000.1	2-oxoglutarate (2OG) and Fe(II)-dependent oxygenase superfamily protein	5e-121	IPR005123; IPR026992; IPR027443	GO:0016491,GO:0055114
MD02G1276600	29	14	13	2	5	0	2.83285	0.00867175	0.999965		Probable carboxylesterase 17	7e-53	AT5G16080.1	carboxyesterase 17	4e-54	IPR013094	GO:0008152,GO:0016787
MD14G1105700	42	32	3	3	2	0	3.78644	0.00285145	0.999965		Probable carotenoid cleavage dioxygenase 4, chloroplastic	0.0	AT4G19170.1	nine-cis-epoxycarotenoid dioxygenase 4	0.0	IPR004294	noGo
MD04G1043100	0	12	70	3	0	0	4.19347	0.0214557	0.999965		Probable cytosolic Fe-S cluster assembly factor AAEL012261	8.6	AT4G05120.1	Major facilitator superfamily protein	2.2	0	noGo
MD08G1082300	297	324	366	133	171	186	0.631814	0.0289249	0.999965		Probable disease resistance protein At4g27220	5e-66	AT4G27220.1	NB-ARC domain-containing disease resistance protein	3e-67	IPR000767; IPR002182; IPR027417	GO:0006952,GO:0043531
MD01G1025400	183	48	57	37	12	21	1.75958	0.0149017	0.999965		Probable glucan 1,3-beta-glucosidase A	6e-40	AT5G01930.1	Glycosyl hydrolase superfamily protein	0.099	IPR001547; IPR008999; IPR010431; IPR013781; IPR017853	GO:0003824,GO:0005975,GO:0051015,GO:0005975
MD06G1173800	79	57	87	40	43	16	0.870098	0.0499982	0.999965		Probable inactive poly [ADP-ribose] polymerase SRO5	1e-78	AT5G62520.1	similar to RCD one 5	8e-80	IPR012317; IPR022003	GO:0003950
MD13G1213400	267	106	28	14	8	1	3.98439	1.13451e-05	0.0606808		Probable inorganic phosphate transporter 1-7	0.0	AT3G54700.1	phosphate transporter 1;7	0.0	IPR004738; IPR005828; IPR016196; IPR020846	GO:0005315,GO:0006817,GO:0016021,GO:0016021,GO:0022857,GO:0055085
MD10G1184700	234	75	81	76	28	9	1.57255	0.0368544	0.999965		Probable inorganic phosphate transporter 1-7	0.0	AT3G54700.1	phosphate transporter 1;7	0.0	IPR004738; IPR005828; IPR016196; IPR020846	GO:0005315,GO:0006817,GO:0016021,GO:0016021,GO:0022857,GO:0055085
MD15G1437400	62	35	35	9	2	8	2.43932	0.00125088	0.866524	RLK	Probable leucine-rich repeat receptor-like protein kinase At1g35710	0.0	AT1G35710.1	Protein kinase family protein with leucine-rich repeat domain	0.0	IPR000719; IPR001611; IPR002290; IPR003591; IPR008266; IPR011009; IPR013320; IPR017441; IPR020635; IPR025875	GO:0005524,GO:0004672,GO:0005524,GO:0006468,GO:0004713,GO:0006468,GO:0005515
MD10G1273200	119	78	91	37	48	27	1.07308	0.00893046	0.999965	RLK	Probable leucine-rich repeat receptor-like serine/threonine-protein kinase At3g14840	0.0	AT3G14840.2	Leucine-rich repeat transmembrane protein kinase	0.0	IPR000719; IPR001611; IPR002290; IPR008271; IPR011009; IPR013320; IPR017441; IPR020635; IPR021720	GO:0005524,GO:0004672,GO:0005524,GO:0006468,GO:0004674,GO:0006468,GO:0005515,GO:0004713,GO:0006468
MD12G1218300	60	76	60	6	23	6	2.23278	0.000131745	0.237564		Probable linoleate 9S-lipoxygenase 5	0.0	AT1G55020.1	lipoxygenase 1	0.0	IPR000907; IPR001024; IPR001246; IPR008976; IPR013819; IPR020833; IPR020834; IPR027433	GO:0005506,GO:0016165,GO:0055114,GO:0005515,GO:0046872,GO:0055114
MD12G1192800	2429	5045	2987	1285	2527	407	1.08727	0.0248498	0.999965	RLK	Probable LRR receptor-like serine/threonine-protein kinase At1g06840	0.0	AT5G01950.1	Leucine-rich repeat protein kinase family protein	0.0	IPR000719; IPR001245; IPR001611; IPR002290; IPR008271; IPR011009; IPR013320; IPR017441; IPR020635	GO:0005524,GO:0004672,GO:0005524,GO:0006468,GO:0004672,GO:0006468,GO:0004674,GO:0006468,GO:0005515,GO:0004713,GO:0006468
MD17G1266000	65	34	93	36	6	11	1.44646	0.0442422	0.999965	RLK	Probable LRR receptor-like serine/threonine-protein kinase At1g51880	0.0	AT1G51800.1	Leucine-rich repeat protein kinase family protein	0.0	IPR000719; IPR001245; IPR002290; IPR008271; IPR011009; IPR013320; IPR017441; IPR020635; IPR024788	GO:0005524,GO:0004672,GO:0005524,GO:0006468,GO:0004672,GO:0006468,GO:0004674,GO:0006468,GO:0004713,GO:0006468
MD07G1219700	14	8	6	0	0	0	5.38875	0.00221628	0.999965	RLK	Probable LRR receptor-like serine/threonine-protein kinase At3g47570	0.0	AT3G47570.1	Leucine-rich repeat protein kinase family protein	0.0	IPR000719; IPR001245; IPR001611; IPR002290; IPR008271; IPR011009; IPR017441; IPR020635	GO:0004672,GO:0005524,GO:0006468,GO:0004672,GO:0006468,GO:0004674,GO:0006468,GO:0005515,GO:0005524,GO:0004713,GO:0006468
MD07G1219600	13	6	0	0	0	0	4.92374	0.0463636	0.999965	RLK	Probable LRR receptor-like serine/threonine-protein kinase At3g47570	0.0	AT3G47570.1	Leucine-rich repeat protein kinase family protein	0.0	IPR000719; IPR001611; IPR002290; IPR003591; IPR008271; IPR011009; IPR013210; IPR013320; IPR017441; IPR020635; IPR025875	GO:0005524,GO:0004672,GO:0005524,GO:0006468,GO:0004674,GO:0006468,GO:0005515,GO:0004713,GO:0006468
MD00G1062800	16	33	29	5	8	5	1.76301	0.00997732	0.999965	RLK	Probable LRR receptor-like serine/threonine-protein kinase At3g47570	0.0	AT3G47570.1	Leucine-rich repeat protein kinase family protein	0.0	IPR000719; IPR001245; IPR001611; IPR002290; IPR003591; IPR008271; IPR011009; IPR013210; IPR020635	GO:0004672,GO:0005524,GO:0006468,GO:0004672,GO:0006468,GO:0004674,GO:0006468,GO:0005515,GO:0004713,GO:0006468
MD07G1090700	162	328	197	113	87	35	1.24397	0.00576926	0.999965	RLK	Probable LRR receptor-like serine/threonine-protein kinase At3g47570	0.0	AT3G47570.1	Leucine-rich repeat protein kinase family protein	0.0	IPR000719; IPR001245; IPR001611; IPR002290; IPR003591; IPR008271; IPR011009; IPR013210; IPR013320; IPR017441; IPR020635	GO:0005524,GO:0004672,GO:0005524,GO:0006468,GO:0004672,GO:0006468,GO:0004674,GO:0006468,GO:0005515,GO:0004713,GO:0006468
MD07G1236500	10	21	12	0	1	4	2.66719	0.0268644	0.999965	RLK	Probable LRR receptor-like serine/threonine-protein kinase At3g47570	0.0	AT3G47570.1	Leucine-rich repeat protein kinase family protein	0.0	IPR000719; IPR001611; IPR002290; IPR003591; IPR008271; IPR011009; IPR013210; IPR013320; IPR017441; IPR020635; IPR025875	GO:0005524,GO:0004672,GO:0005524,GO:0006468,GO:0004674,GO:0006468,GO:0005515,GO:0004713,GO:0006468
MD02G1107100	82	120	35	20	54	10	1.32675	0.0484223	0.999965	RLK	Probable L-type lectin-domain containing receptor kinase S.5	1e-92	AT5G06740.1	Concanavalin A-like lectin protein kinase family protein	7e-94	IPR000719; IPR002290; IPR008271; IPR011009; IPR013320; IPR017441; IPR020635	GO:0004672,GO:0005524,GO:0006468,GO:0004674,GO:0006468,GO:0005524,GO:0004713,GO:0006468
MD14G1168900	2	0	24	0	0	0	4.98417	0.0491511	0.999965		Probable nucleoredoxin 1	1e-45	AT1G60420.1	DC1 domain-containing protein	5e-47	IPR012336	noGo
MD16G1094400	1559	1231	3150	859	1190	701	0.731169	0.0135821	0.999965		Probable nucleoredoxin 1	0.0	AT1G60420.1	DC1 domain-containing protein	0.0	IPR011424; IPR012336; IPR017937	GO:0045454,GO:0047134,GO:0055114
MD16G1022200	1466	1058	1102	725	377	272	1.09307	0.00654996	0.999965	PECT	Probable pectinesterase/pectinesterase inhibitor 6	0.0	AT1G23200.1	Plant invertase/pectin methylesterase inhibitor superfamily	0.0	IPR000070; IPR006501; IPR011050; IPR012334	GO:0004857,GO:0030599,GO:0005618,GO:0030599,GO:0042545
MD16G1022100	161	167	191	102	78	45	0.874837	0.00987447	0.999965	PECT	Probable pectinesterase/pectinesterase inhibitor 6	0.0	AT1G23200.1	Plant invertase/pectin methylesterase inhibitor superfamily	0.0	IPR000070; IPR006501; IPR011050; IPR012334	GO:0004857,GO:0030599,GO:0005618,GO:0030599,GO:0042545
MD03G1290900	22	10	5	3	1	0	3.00521	0.0249548	0.999965	PECT	Probable pectinesterase/pectinesterase inhibitor 7	0.0	AT1G02810.1	Plant invertase/pectin methylesterase inhibitor superfamily	0.0	IPR000070; IPR006501; IPR011050; IPR012334; IPR018040	GO:0005618,GO:0030599,GO:0042545,GO:0004857,GO:0030599
MD14G1187200	10	7	17	0	2	1	3.15157	0.0158145	0.999965		Probable RNA helicase SDE3	4.3	AT3G48180.1	unknown protein; BEST Arabidopsis thaliana protein match is: unknown protein (TAIR:AT1G19020.1); Has 84 Blast hits to 84 proteins in 15 species: Archae -0; Bacteria -0; Metazoa -0; Fungi -0; Plants -84; Viruses -0; Other Eukaryotes -0 (source: NCBI BLink).	2e-17	0	noGo
MD14G1232400	305	152	342	134	76	119	0.879064	0.0434127	0.999965		Probable S-adenosylmethionine-dependent methyltransferase At5g37990	3e-90	AT1G15125.1	S-adenosyl-L-methionine-dependent methyltransferases superfamily protein	4e-104	IPR005299	GO:0008168
MD06G1058300	114	180	185	71	117	59	0.623381	0.0413544	0.999965		Probable small nuclear ribonucleoprotein Sm D2	6e-34	AT3G62840.1	Small nuclear ribonucleoprotein family protein	8e-46	IPR001163; IPR006649; IPR010920; IPR027248	GO:0008380,GO:0030532
MD11G1311300	41	40	100	7	33	13	1.42137	0.0204402	0.999965		Probable transmembrane GTPase FZO-like, chloroplastic	7e-19	AT1G03160.1	FZO-like	4e-20	0	noGo
MD11G1311400	43	39	83	21	25	20	0.929908	0.0409724	0.999965		Probable transmembrane GTPase FZO-like, chloroplastic	1e-41	AT1G03160.1	FZO-like	6e-43	IPR001401	GO:0003924,GO:0005525
MD00G1143500	92	118	97	40	71	26	0.883947	0.0252744	0.999965	WRKY	Probable WRKY transcription factor 40	8e-69	AT1G80840.1	WRKY DNA-binding protein 40	5e-70	IPR003657	GO:0003700,GO:0043565
MD06G1104100	74	52	76	29	34	11	1.16036	0.0155281	0.999965	WRKY	Probable WRKY transcription factor 41	3e-59	AT4G11070.1	WRKY family transcription factor	2e-60	IPR003657	GO:0003700,GO:0043565
MD16G1151000	59	29	21	5	15	5	1.93549	0.0111446	0.999965	WRKY	Probable WRKY transcription factor 48	7e-52	AT5G49520.1	WRKY DNA-binding protein 48	4e-53	IPR003657	GO:0003700,GO:0043565
MD04G1175500	19	16	19	0	3	1	3.47012	0.00165926	0.931416	WRKY	Probable WRKY transcription factor 70	5e-24	AT3G56400.1	WRKY DNA-binding protein 70	3e-25	IPR003657	GO:0003700,GO:0043565
MD06G1027300	37	24	46	3	12	7	1.95335	0.00361819	0.999965		Probable xyloglucan endotransglucosylase/hydrolase protein 30	7e-168	AT1G32170.1	xyloglucan endotransglucosylase/hydrolase 30	4e-169	IPR000757; IPR008985; IPR010713; IPR013320	GO:0005618,GO:0006073,GO:0016762,GO:0048046,GO:0005975
MD10G1038400	10	8	1	0	0	0	4.87657	0.02012	0.999965		Programmed cell death protein 4	1e-27	AT1G22730.1	MA3 domain-containing protein	0.0	IPR003891; IPR016021; IPR016024	GO:0005488,GO:0016070
MD06G1162100	9	7	14	2	0	0	3.52508	0.0214748	0.999965		Proline transporter 1	1e-112	AT2G39890.1	proline transporter 1	8e-114	IPR013057	noGo
MD14G1159800	1	0	29	0	0	0	5.16406	0.0440475	0.999965		Prolyl 3-hydroxylase OGFOD1	0.74	AT2G05642.1	Nucleic acid-binding, OB-fold-like protein	0.009	0	noGo
MD16G1034200	10	3	1	0	0	0	4.46654	0.0496642	0.999965		Protein DETOXIFICATION 12	0.0	AT1G15170.1	MATE efflux family protein	0.0	IPR002528	GO:0006855,GO:0015238,GO:0015297,GO:0016020,GO:0055085
MD03G1140300	37	7	7	1	4	0	3.26966	0.0136953	0.999965		Protein DMR6-LIKE OXYGENASE 2	2e-66	AT4G10490.1	2-oxoglutarate (2OG) and Fe(II)-dependent oxygenase superfamily protein	1e-67	IPR005123; IPR026992; IPR027443	GO:0016491,GO:0055114
MD01G1228800	4547	2785	1767	1862	1282	581	1.06278	0.0292714	0.999965		Protein DOWNY MILDEW RESISTANCE 6	4e-180	AT5G24530.1	2-oxoglutarate (2OG) and Fe(II)-dependent oxygenase superfamily protein	0.0	IPR005123; IPR026992; IPR027443	GO:0016491,GO:0055114
MD04G1050800	102	82	144	25	59	19	1.37296	0.00158774	0.931416	CER	Protein ECERIFERUM 2	3e-10	AT5G02890.1	HXXXD-type acyl-transferase family protein	1e-70	IPR003480; IPR023213	noGo
MD15G1386300	145	248	617	48	62	155	1.36116	0.021317	0.999965	CER	Protein ECERIFERUM 2	2e-111	AT4G24510.1	HXXXD-type acyl-transferase family protein	9e-113	IPR003480; IPR023213	noGo
MD07G1006900	31	80	86	17	20	15	1.52899	0.00225179	0.999965		Protein gamma response 1	2e-84	AT3G52115.1	gamma response gene 1	1e-85	IPR013882	noGo
MD06G1029400	147	126	93	66	45	24	1.16077	0.0139128	0.999965		Protein NRT1/ PTR FAMILY 7.3	0.0	AT1G32450.1	nitrate transporter 1.5	0.0	IPR000109; IPR016196	GO:0005215,GO:0006810,GO:0016020
MD03G1076700	113	169	196	81	102	68	0.568347	0.0381373	0.999965		Protein NRT1/ PTR FAMILY 8.1	2e-48	AT3G54140.1	peptide transporter 1	1e-49	IPR000109; IPR018456	GO:0005215,GO:0006810,GO:0016020,GO:0005215,GO:0006857,GO:0016020
MD13G1030600	326	229	213	101	116	33	1.38671	0.0020393	0.999965		Protein PLANT CADMIUM RESISTANCE 2	1e-56	AT1G14870.1	PLANT CADMIUM RESISTANCE 2	8e-58	IPR006461	noGo
MD11G1071800	14	21	9	4	3	0	2.40663	0.0281378	0.999965		Protein PSY3	6e-06	AT1G07175.1	unknown protein; FUNCTIONS IN: molecular_function unknown; INVOLVED IN: biological_process unknown; LOCATED IN: endomembrane system; BEST Arabidopsis thaliana protein match is: unknown protein (TAIR:AT2G29995.1); Has 30201 Blast hits to 17322 proteins in 780 species: Archae -12; Bacteria -1396; Metazoa -17338; Fungi -3422; Plants -5037; Viruses -0; Other Eukaryotes -2996 (source: NCBI BLink).	4e-14	0	noGo
MD14G1228600	99	58	73	39	12	19	1.36889	0.0195697	0.999965		Protein SAR DEFICIENT 1	1e-159	AT1G73805.1	Calmodulin binding protein-like	7e-161	IPR012416	noGo
MD13G1206000	188	235	1497	23	177	64	2.43127	0.0174009	0.999965		Protein SIEVE ELEMENT OCCLUSION B	1e-114	AT3G01680.1	CONTAINS InterPro DOMAIN/s: Mediator complex subunit Med28 (InterPro:IPR021640); BEST Arabidopsis thaliana protein match is: unknown protein (TAIR:AT3G01670.1); Has 122 Blast hits to 112 proteins in 13 species: Archae -0; Bacteria -0; Metazoa -0; Fungi -0; Plants -122; Viruses -0; Other Eukaryotes -0 (source: NCBI BLink).	7e-116	IPR027942; IPR027944	noGo
MD13G1205900	90	116	418	31	52	41	1.8592	0.00036462	0.463102		Protein SIEVE ELEMENT OCCLUSION B	9e-45	AT3G01680.1	CONTAINS InterPro DOMAIN/s: Mediator complex subunit Med28 (InterPro:IPR021640); BEST Arabidopsis thaliana protein match is: unknown protein (TAIR:AT3G01670.1); Has 122 Blast hits to 112 proteins in 13 species: Archae -0; Bacteria -0; Metazoa -0; Fungi -0; Plants -122; Viruses -0; Other Eukaryotes -0 (source: NCBI BLink).	5e-46	IPR027944	noGo
MD11G1090000	46	71	1	0	9	1	3.48961	0.0118393	0.999965		Protein SPA1-RELATED 4	1e-23	AT1G53090.1	SPA1-related 4	6e-25	0	noGo
MD11G1272300	11	18	14	1	2	3	2.46664	0.0141019	0.999965		Protein SRG1	4e-61	AT1G17020.1	senescence-related gene 1	2e-62	IPR026992; IPR027443	noGo
MD11G1272000	71	23	23	9	12	1	2.26219	0.0100601	0.999965		Protein SRG1	3e-151	AT1G17020.1	senescence-related gene 1	1e-152	IPR005123; IPR026992; IPR027443	GO:0016491,GO:0055114
MD11G1271400	107	91	59	18	26	4	2.21683	0.000289276	0.419895		Protein SRG1	6e-149	AT1G17020.1	senescence-related gene 1	3e-150	IPR005123; IPR026992; IPR027443	GO:0016491,GO:0055114
MD05G1142600	207	157	200	75	87	93	0.788319	0.0192959	0.999965		Protein SUPPRESSOR OF npr1-1, CONSTITUTIVE 1	8e-58	AT1G69550.1	disease resistance protein (TIR-NBS-LRR class)	3e-95	IPR001611; IPR003591; IPR011713	GO:0005515
MD02G1096100	3619	4676	12755	2238	2355	2315	1.1362	0.00206611	0.999965	TIFY/JAZ	Protein TIFY 10A	2e-54	AT1G19180.1	jasmonate-zim-domain protein 1	1e-55	IPR010399; IPR018467	noGo
MD17G1164400	3	1	30	1	0	0	4.42936	0.0226966	0.999965	TIFY/JAZ	Protein TIFY 10B	3e-28	AT1G74950.1	TIFY domain/Divergent CCT motif family protein	2e-29	IPR010399; IPR018467	noGo
MD09G1178600	70	40	169	25	14	6	2.22808	0.000503884	0.499497	TIFY/JAZ	Protein TIFY 10c	4e-22	AT1G72450.1	jasmonate-zim-domain protein 6	2e-23	IPR010399; IPR018467	noGo
MD15G1434400	2	10	110	0	5	5	3.01186	0.0247913	0.999965	TIFY/JAZ	Protein TIFY 3B	3e-15	AT5G20900.1	jasmonate-zim-domain protein 12	2e-16	IPR010399; IPR018467	noGo
MD02G1105900	1952	1259	3784	1083	1096	751	0.860814	0.00956602	0.999965	TIFY/JAZ	Protein TIFY 3B	7e-30	AT5G20900.1	jasmonate-zim-domain protein 12	4e-31	IPR010399; IPR018467	noGo
MD13G1030000	856	1365	2783	785	804	580	0.777448	0.0163164	0.999965	TIFY/JAZ	Protein TIFY 6B	9e-43	AT3G17860.1	jasmonate-zim-domain protein 3	5e-44	IPR010399; IPR018467	noGo
MD06G1223100	473	380	638	273	280	252	0.514916	0.0407732	0.999965		Protein translocase subunit SecA	0.64	AT1G18060.1	unknown protein; INVOLVED IN: biological_process unknown; LOCATED IN: chloroplast; EXPRESSED IN: 22 plant structures; EXPRESSED DURING: 13 growth stages; Has 74 Blast hits to 74 proteins in 29 species: Archae -0; Bacteria -19; Metazoa -0; Fungi -0; Plants -49; Viruses -0; Other Eukaryotes -6 (source: NCBI BLink).	3e-67	0	noGo
MD15G1134100	150	150	181	92	75	60	0.731432	0.0143521	0.999965		Protein Ycf2	1e-31	AT5G05670.2	signal recognition particle binding	5e-86	IPR008543; IPR019009; IPR027417	GO:0005524,GO:0009507
MD04G1222400	60	15	7	0	1	3	4.09233	0.00161022	0.931416		Protocadherin-like wing polarity protein stan	0.051	AT4G14746.1	CONTAINS InterPro DOMAIN/s: EGF-like (InterPro:IPR006210); Has 259 Blast hits to 234 proteins in 55 species: Archae -0; Bacteria -0; Metazoa -184; Fungi -0; Plants -69; Viruses -0; Other Eukaryotes -6 (source: NCBI BLink).	2e-29	0	noGo
MD13G1144800	18	18	7	0	1	1	4.15435	0.00326258	0.999965		Protoheme IX farnesyltransferase, mitochondrial	4.4	AT2G44600.1	unknown protein; FUNCTIONS IN: molecular_function unknown; INVOLVED IN: biological_process unknown; LOCATED IN: plasma membrane; BEST Arabidopsis thaliana protein match is: unknown protein (TAIR:AT3G60200.1); Has 56 Blast hits to 55 proteins in 11 species: Archae -0; Bacteria -0; Metazoa -2; Fungi -0; Plants -52; Viruses -0; Other Eukaryotes -2 (source: NCBI BLink).	0.36	#N/A	#N/A
MD08G1007800	211	91	84	45	32	16	1.82036	0.00171297	0.931416	RLK	Putative cysteine-rich receptor-like protein kinase 35	2e-108	AT4G11530.1	cysteine-rich RLK (RECEPTOR-like protein kinase) 34	8e-110	IPR000719; IPR001245; IPR002290; IPR008271; IPR008808; IPR011009; IPR020635	GO:0004672,GO:0005524,GO:0006468,GO:0004672,GO:0006468,GO:0004674,GO:0006468,GO:0004713,GO:0006468
MD14G1049300	118	128	324	77	94	62	0.878316	0.0193753	0.999965		Putative disease resistance protein At3g14460	2e-58	AT3G14460.1	LRR and NB-ARC domains-containing disease resistance protein	1e-59	IPR000157; IPR025875	GO:0005515,GO:0007165
MD16G1082300	123	132	127	67	74	20	0.973625	0.0259259	0.999965		Putative disease resistance protein At4g11170	2e-75	AT1G27170.1	transmembrane receptors;ATP binding	0.0	IPR000767; IPR002182; IPR027417	GO:0006952,GO:0043531
MD15G1035200	29	55	105	24	25	13	1.20204	0.0218911	0.999965		Putative disease resistance protein RGA3	3e-122	AT3G14470.1	NB-ARC domain-containing disease resistance protein	2e-100	IPR000767; IPR001611; IPR002182; IPR027417	GO:0006952,GO:0005515,GO:0043531
MD07G1028000	5	15	20	3	2	1	2.33318	0.0297797	0.999965		Putative disease resistance RPP13-like protein 1	0.0	AT3G14470.1	NB-ARC domain-containing disease resistance protein	0.0	IPR000767; IPR002182; IPR027417	GO:0006952,GO:0043531
MD03G1024900	223	438	730	125	275	173	0.876271	0.021684	0.999965		Putative disease resistance RPP13-like protein 1	6e-121	AT3G14470.1	NB-ARC domain-containing disease resistance protein	3e-122	IPR000767; IPR002182; IPR027417	GO:0006952,GO:0043531
MD15G1041200	56	98	134	18	25	2	2.37338	0.000140283	0.237564		Putative F-box/kelch-repeat protein At4g39760	0.0004	AT4G39760.1	Galactose oxidase/kelch repeat superfamily protein	2e-05	IPR012871; IPR015916	noGo
MD10G1305500	92	61	101	13	65	9	1.34161	0.0378213	0.999965		Putative mitochondrial import inner membrane translocase subunit Tim8 A-B	0.18	AT5G45540.1	Protein of unknown function (DUF594)	5e-84	IPR007658; IPR025315	noGo
MD02G1250200	19	21	19	5	5	5	1.63133	0.025839	0.999965		Putative RING-H2 finger protein ATL21A	4e-08	AT2G46495.1	RING/U-box superfamily protein	2e-09	0	noGo
MD06G1106800	15	24	14	3	7	0	2.19275	0.0301292	0.999965		Putative RING-H2 finger protein ATL21B	7e-50	AT5G53110.1	RING/U-box superfamily protein	2e-96	IPR001841; IPR013083	GO:0005515,GO:0008270
MD09G1143400	60	73	106	14	41	18	1.38026	0.00252867	0.999965		Putative UDP-glucose flavonoid 3-O-glucosyltransferase 3	3e-128	AT3G21790.1	UDP-Glycosyltransferase superfamily protein	8e-113	IPR002213	GO:0008152
MD13G1034200	589	903	570	283	514	276	0.651137	0.0400927	0.999965		Putative zinc finger protein At1g68190	3e-51	AT1G68190.1	B-box zinc finger family protein	2e-52	IPR000315	GO:0005622,GO:0008270
MD05G1167700	533	738	1127	399	485	361	0.55429	0.0155268	0.999965		Quinone-oxidoreductase homolog, chloroplastic	0.012	AT4G13010.1	Oxidoreductase, zinc-binding dehydrogenase family protein	0.002	0	noGo
MD12G1173900	4	7	19	0	1	0	4.33886	0.0107064	0.999965	RLP	Receptor-like protein 12	1e-24	AT2G33050.1	receptor like protein 26	3e-28	IPR001611	GO:0005515
MD15G1429800	20	13	30	4	1	3	2.5603	0.00477433	0.999965	RLP	Receptor-like protein 12	8e-28	AT2G34930.1	disease resistance family protein / LRR family protein	6e-38	IPR001611; IPR025875	GO:0005515
MD07G1107800	22	33	23	8	3	0	2.52821	0.00726948	0.999965	RLP	Receptor-like protein 12	3e-108	AT1G45616.1	receptor like protein 6	1e-177	IPR001611; IPR003591; IPR013210	GO:0005515
MD07G1106700	22	16	47	11	4	0	2.13364	0.0295481	0.999965	RLP	Receptor-like protein 12	6e-128	AT1G45616.1	receptor like protein 6	7e-162	IPR001611; IPR003591; IPR013210	GO:0005515
MD07G1106900	53	102	83	16	28	2	2.1203	0.001186	0.860758	RLP	Receptor-like protein 12	8e-111	AT1G45616.1	receptor like protein 6	1e-176	IPR001611; IPR003591; IPR013210	GO:0005515
MD01G1057400	29	45	49	16	15	5	1.44083	0.0108113	0.999965	RLP	Receptor-like protein 12	2e-29	AT2G34930.1	disease resistance family protein / LRR family protein	2e-40	IPR013210	noGo
MD01G1178900	33	36	50	17	19	5	1.22199	0.030183	0.999965	RLP	Receptor-like protein 12	1e-22	AT1G07390.3	receptor like protein 1	5e-37	0	noGo
MD01G1174800	41	106	101	39	37	25	0.917372	0.0391276	0.999965	RLP	Receptor-like protein 12	8e-82	AT2G34930.1	disease resistance family protein / LRR family protein	3e-119	IPR001611; IPR003591; IPR013210; IPR025875	GO:0005515
MD17G1062100	121	194	111	60	80	48	0.876877	0.0213614	0.999965	RLK	Receptor-like protein kinase FERONIA	0.0	AT3G51550.1	Malectin/receptor-like protein kinase family protein	0.0	IPR000719; IPR001245; IPR002290; IPR008271; IPR011009; IPR013320; IPR017441; IPR020635; IPR024788	GO:0005524,GO:0004672,GO:0005524,GO:0006468,GO:0004672,GO:0006468,GO:0004674,GO:0006468,GO:0004713,GO:0006468
MD10G1115100	53	26	58	20	12	14	1.20385	0.0356352	0.999965	RLK	Receptor-like protein kinase HAIKU2	0.0	AT1G09970.2	Leucine-rich receptor-like protein kinase family protein	0.0	IPR000719; IPR001611; IPR002290; IPR003591; IPR008271; IPR011009; IPR013210; IPR017441; IPR020635	GO:0005524,GO:0004672,GO:0005524,GO:0006468,GO:0004674,GO:0006468,GO:0005515,GO:0004713,GO:0006468
MD05G1112600	111	108	53	40	47	18	1.13933	0.0291597	0.999965	RLK	Receptor-like protein kinase HAIKU2	0.0	AT1G09970.2	Leucine-rich receptor-like protein kinase family protein	0.0	IPR000719; IPR001611; IPR002290; IPR003591; IPR008271; IPR011009; IPR013210; IPR017441; IPR020635	GO:0005524,GO:0004672,GO:0005524,GO:0006468,GO:0004674,GO:0006468,GO:0005515,GO:0004713,GO:0006468
MD02G1066200	53	55	84	7	16	3	2.58229	5.86523e-06	0.0397301	RLK	Receptor-like protein kinase HSL1	0.0	AT5G25930.1	Protein kinase family protein with leucine-rich repeat domain	0.0	IPR000719; IPR002290; IPR003591; IPR008271; IPR011009; IPR013210; IPR017441; IPR020635; IPR025875	GO:0005524,GO:0004672,GO:0005524,GO:0006468,GO:0004674,GO:0006468,GO:0004713,GO:0006468
MD02G1066300	57	58	72	30	24	8	1.27807	0.01128	0.999965	RLK	Receptor-like protein kinase HSL1	0.0	AT5G25930.1	Protein kinase family protein with leucine-rich repeat domain	0.0	IPR000719; IPR002290; IPR003591; IPR008271; IPR011009; IPR013210; IPR017441; IPR020635	GO:0005524,GO:0004672,GO:0005524,GO:0006468,GO:0004674,GO:0006468,GO:0004713,GO:0006468
MD09G1095900	105	101	79	37	33	46	0.942167	0.0331206	0.999965	RLK	Receptor-like serine/threonine-protein kinase SD1-8	0.0	AT4G21380.1	receptor kinase 3	0.0	IPR000719; IPR000858; IPR001480; IPR002290; IPR003609; IPR008271; IPR011009; IPR013227; IPR013320; IPR020635	GO:0004672,GO:0005524,GO:0006468,GO:0004674,GO:0006468,GO:0048544,GO:0004713,GO:0006468
MD13G1214500	8	7	1	0	0	0	4.62041	0.0330871	0.999965		Receptor-type tyrosine-protein phosphatase F	2.4	AT5G05560.1	E3 ubiquitin ligase, putative	0.5	0	noGo
MD02G1010600	21	3	0	0	0	0	5.2987	0.029642	0.999965		Retrovirus-related Pol polyprotein from transposon TNT 1-94	2e-07	AT1G34070.1	CONTAINS InterPro DOMAIN/s: Retrotransposon gag protein (InterPro:IPR005162); BEST Arabidopsis thaliana protein match is: unknown protein (TAIR:AT5G48050.1); Has 648 Blast hits to 647 proteins in 29 species: Archae -0; Bacteria -0; Metazoa -16; Fungi -25; Plants -607; Viruses -0; Other Eukaryotes -0 (source: NCBI BLink).	8e-14	IPR001878	GO:0003676,GO:0008270
MD13G1050200	1	9	31	0	0	1	4.72343	0.00918058	0.999965		Retrovirus-related Pol polyprotein from transposon TNT 1-94	4e-178	AT4G23160.1	cysteine-rich RLK (RECEPTOR-like protein kinase) 8	7e-134	IPR001584; IPR012337; IPR013103; IPR025724	GO:0015074,GO:0003676
MD10G1307000	4	64	32	1	13	3	2.277	0.0353555	0.999965		Retrovirus-related Pol polyprotein from transposon TNT 1-94	1e-158	AT4G23160.1	cysteine-rich RLK (RECEPTOR-like protein kinase) 8	1e-109	IPR001584; IPR012337; IPR013103; IPR025724	GO:0015074,GO:0003676
MD06G1052700	230	152	124	80	95	30	1.08082	0.0233841	0.999965		RING-H2 finger protein ATL22	3e-15	AT5G53110.1	RING/U-box superfamily protein	3e-18	0	noGo
MD10G1334000	89	119	146	24	80	50	0.854275	0.0491726	0.999965		RNA polymerase sigma factor FliA	6.6	AT1G58200.1	MSCS-like 3	1.7	0	noGo
MD10G1021600	9	22	2	1	2	1	2.79762	0.0386626	0.999965		RNA-binding protein 2	4e-52	AT1G21320.1	nucleotide binding;nucleic acid binding	1e-41	IPR000504; IPR012677; IPR024888	GO:0003676,GO:0017069,GO:0000166
MD02G1252600	14	9	12	1	1	1	3.21762	0.00866193	0.999965		Rust resistance kinase Lr10	5e-123	AT1G70250.1	receptor serine/threonine kinase, putative	2e-104	IPR000719; IPR002290; IPR008271; IPR011009; IPR013320; IPR017441; IPR020635	GO:0004672,GO:0005524,GO:0006468,GO:0004674,GO:0006468,GO:0005524,GO:0004713,GO:0006468
MD02G1249300	65	30	41	16	8	2	2.1255	0.00482765	0.999965		Rust resistance kinase Lr10	2e-120	AT5G38260.1	Protein kinase superfamily protein	5e-110	IPR000719; IPR002290; IPR008271; IPR011009; IPR013320; IPR017441; IPR020635	GO:0004672,GO:0005524,GO:0006468,GO:0004674,GO:0006468,GO:0005524,GO:0004713,GO:0006468
MD02G1250000	40	19	56	9	9	8	1.7683	0.00536318	0.999965		Rust resistance kinase Lr10	2e-122	AT1G70250.1	receptor serine/threonine kinase, putative	3e-105	IPR000719; IPR001245; IPR002290; IPR008271; IPR011009; IPR013320; IPR017441; IPR020635	GO:0005524,GO:0004672,GO:0005524,GO:0006468,GO:0004672,GO:0006468,GO:0004674,GO:0006468,GO:0004713,GO:0006468
MD02G1249500	58	25	33	14	17	8	1.31616	0.0370157	0.999965		Rust resistance kinase Lr10	5e-121	AT5G38280.1	PR5-like receptor kinase	5e-104	IPR000719; IPR002290; IPR008271; IPR011009; IPR013320; IPR017441; IPR020635	GO:0004672,GO:0005524,GO:0006468,GO:0004674,GO:0006468,GO:0005524,GO:0004713,GO:0006468
MD02G1247200	76	123	140	31	65	41	0.950563	0.0104665	0.999965		Rust resistance kinase Lr10	4e-133	AT1G66920.2	Protein kinase superfamily protein	4e-109	IPR000719; IPR002290; IPR008271; IPR011009; IPR013320; IPR017441; IPR020635	GO:0004672,GO:0005524,GO:0006468,GO:0004674,GO:0006468,GO:0005524,GO:0004713,GO:0006468
MD10G1071000	1599	1313	2039	807	1144	596	0.637284	0.00505413	0.999965		Salicylate carboxymethyltransferase	5e-77	AT5G38020.1	S-adenosyl-L-methionine-dependent methyltransferases superfamily protein	3e-66	IPR005299	GO:0008168
MD16G1027500	1412	703	644	540	269	201	1.18303	0.0157951	0.999965		Serine carboxypeptidase-like 50	5e-174	AT1G15000.1	serine carboxypeptidase-like 50	3e-175	IPR001563; IPR018202	GO:0004185,GO:0006508
MD15G1404800	66	58	41	26	24	9	1.22406	0.0267047	0.999965		Serine/threonine-protein kinase-like protein CCR4	0.0	AT5G47850.1	CRINKLY4 related 4	0.0	IPR000719; IPR002290; IPR008271; IPR009091; IPR011009; IPR013320; IPR017441; IPR020635	GO:0005524,GO:0004672,GO:0005524,GO:0006468,GO:0004674,GO:0006468,GO:0004713,GO:0006468
MD09G1199000	65	2	6	2	6	0	3.18234	0.0271571	0.999965		Short transient receptor potential channel 2	4.3	AT1G51915.1	cryptdin protein-related	2e-06	0	noGo
MD07G1274200	2	93	7	0	5	1	3.87784	0.00802657	0.999965		Short-chain dehydrogenase TIC 32, chloroplastic	3e-173	AT4G23420.3	NAD(P)-binding Rossmann-fold superfamily protein	5e-157	IPR002198; IPR002347; IPR016040	GO:0008152,GO:0016491
MD07G1274500	18	245	4	6	15	3	3.27617	0.00444304	0.999965		Short-chain dehydrogenase TIC 32, chloroplastic	3e-175	AT4G23420.3	NAD(P)-binding Rossmann-fold superfamily protein	5e-157	IPR002198; IPR002347; IPR016040	GO:0008152,GO:0016491
MD16G1028800	25	12	193	2	3	19	2.55344	0.0184062	0.999965		Siderophore iron transporter ARN1	2.0	AT2G18780.1	F-box and associated interaction domains-containing protein	3.2	0	noGo
MD07G1034400	1402	858	892	655	344	164	1.16811	0.0141658	0.999965		Snake venom metalloprotease inhibitor 02A10	3.2	AT5G46650.1	RING/U-box superfamily protein	0.57	0	noGo
MD03G1132200	226	315	378	110	143	125	0.90134	0.000394545	0.471632		Solute carrier family 13 member 3	6.0	AT5G61412.1	unknown protein; FUNCTIONS IN: molecular_function unknown; INVOLVED IN: biological_process unknown; LOCATED IN: cellular_component unknown; BEST Arabidopsis thaliana protein match is: unknown protein (TAIR:AT4G33145.1); Has 30201 Blast hits to 17322 proteins in 780 species: Archae -12; Bacteria -1396; Metazoa -17338; Fungi -3422; Plants -5037; Viruses -0; Other Eukaryotes -2996 (source: NCBI BLin…	0.11	0	noGo
MD05G1073000	251	331	330	103	172	91	0.996477	0.000137428	0.237564		Sorting nexin-13	8e-13	AT2G15900.1	Phox-associated domain;Phox-like;Sorting nexin, C-terminal	0.0	IPR001683; IPR003114; IPR013937; IPR013996	GO:0005515,GO:0007154,GO:0035091
MD03G1196900	5	5	10	1	0	0	3.81649	0.0307292	0.999965		SsrA-binding protein	1.8	AT3G42150.2	unknown protein; FUNCTIONS IN: molecular_function unknown; INVOLVED IN: biological_process unknown; LOCATED IN: endomembrane system; EXPRESSED IN: male gametophyte, pollen tube; EXPRESSED DURING: L mature pollen stage, M germinated pollen stage; BEST Arabidopsis thaliana protein match is: unknown protein (TAIR:AT1G21930.1); Has 35333 Blast hits to 34131 proteins in 2444 species: Archae -798; Bact…	2e-15	0	noGo
MD07G1251800	35	52	57	18	11	16	1.27583	0.0128169	0.999965		Sterol esterase TGL1	0.049	AT1G05430.1	unknown protein; Has 31 Blast hits to 31 proteins in 9 species: Archae -0; Bacteria -0; Metazoa -0; Fungi -0; Plants -31; Viruses -0; Other Eukaryotes -0 (source: NCBI BLink).	0.005	0	noGo
MD04G1236900	48	10	18	8	1	2	2.51171	0.0169889	0.999965		Subtilisin-like protease SBT1.9	0.0	AT5G67090.1	Subtilisin-like serine endopeptidase family protein	0.0	IPR000209; IPR010259; IPR015500; IPR023828	GO:0004252,GO:0006508,GO:0004252,GO:0042802,GO:0043086
MD07G1240700	6238	6481	14923	3040	5362	4350	0.696157	0.0300129	0.999965		Superoxide dismutase [Fe] 2, chloroplastic	6e-138	AT5G51100.1	Fe superoxide dismutase 2	3e-139	IPR001189; IPR019831; IPR019832; IPR019833	GO:0004784,GO:0006801,GO:0046872,GO:0055114
MD17G1250000	2074	440	347	253	168	70	2.38638	0.0157063	0.999965	PR-5	Thaumatin-like protein 1a	2e-163	AT1G20030.2	Pathogenesis-related thaumatin superfamily protein	2e-87	IPR001938; IPR017949	noGo
MD17G1248400	0	0	56	0	1	0	5.07962	0.0401484	0.999965		Thioredoxin-like protein HCF164, chloroplastic	7e-82	AT4G37200.1	Thioredoxin superfamily protein	4e-79	IPR005746; IPR012336; IPR013766	GO:0006662,GO:0009055,GO:0015035,GO:0045454,GO:0045454
MD05G1228600	177	145	360	55	87	81	1.19577	0.00171878	0.931416		Thiosulfate/3-mercaptopyruvate sulfurtransferase 1, mitochondrial	3e-58	AT1G79230.1	mercaptopyruvate sulfurtransferase 1	2e-59	IPR001763	noGo
MD05G1228700	875	690	1201	324	468	473	0.740007	0.0121947	0.999965		Thiosulfate/3-mercaptopyruvate sulfurtransferase 1, mitochondrial	8e-116	AT1G79230.1	mercaptopyruvate sulfurtransferase 1	4e-117	IPR001307; IPR001763	GO:0004792
MD05G1022500	0	0	49	0	0	0	5.84807	0.0349083	0.999965		TMV resistance protein N	6e-51	AT4G12010.1	Disease resistance protein (TIR-NBS-LRR class) family	4e-42	IPR001611; IPR003591; IPR025875	GO:0005515
MD05G1006800	5	1	35	1	0	0	4.71575	0.0119286	0.999965		TMV resistance protein N	4e-46	AT1G72900.1	Toll-Interleukin-Resistance (TIR) domain-containing protein	4e-40	IPR000157	GO:0005515,GO:0007165
MD07G1079300	16	24	52	9	3	4	2.07233	0.00737731	0.999965		TMV resistance protein N	1e-135	AT5G36930.2	Disease resistance protein (TIR-NBS-LRR class) family	9e-165	IPR000157; IPR000767; IPR002182; IPR027417	GO:0006952,GO:0043531,GO:0005515,GO:0007165
MD09G1039600	28	22	12	3	6	6	1.75872	0.0334546	0.999965		TMV resistance protein N	1e-153	AT5G36930.2	Disease resistance protein (TIR-NBS-LRR class) family	0.0	IPR000157; IPR000767; IPR001611; IPR002182; IPR025875; IPR027417	GO:0005515,GO:0007165,GO:0006952,GO:0005515,GO:0043531
MD17G1024700	39	46	39	8	23	13	1.19107	0.0304776	0.999965		TMV resistance protein N	9e-81	AT5G36930.2	Disease resistance protein (TIR-NBS-LRR class) family	8e-75	IPR000157; IPR000767; IPR002182; IPR027417	GO:0006952,GO:0043531,GO:0005515,GO:0007165
MD05G1136700	210	232	130	82	108	55	0.959278	0.0157061	0.999965		TMV resistance protein N	4e-87	AT5G17680.1	disease resistance protein (TIR-NBS-LRR class), putative	6e-92	IPR000157; IPR000767; IPR002182; IPR027417	GO:0006952,GO:0043531,GO:0005515,GO:0007165
MD03G1051100	29	67	145	5	31	29	1.41868	0.0478341	0.999965		Trans-cinnamate 4-monooxygenase	0.0	AT2G30490.1	cinnamate-4-hydroxylase	0.0	IPR001128; IPR002401; IPR017972	GO:0055114,GO:0005506,GO:0009055,GO:0020037,GO:0055114,GO:0005506,GO:0020037,GO:0055114
MD14G1227400	12	14	8	3	2	1	2.21043	0.0384351	0.999965		Transcription factor BEE 3	1e-57	AT1G73830.1	BR enhanced expression 3	7e-59	IPR011598	GO:0046983
MD13G1184300	21	43	40	8	13	9	1.43189	0.0138671	0.999965		Transcription factor MUTE	4e-77	AT3G06120.1	basic helix-loop-helix (bHLH) DNA-binding superfamily protein	2e-78	IPR011598	GO:0046983
MD16G1218000	18	3	21	2	2	0	3.09647	0.0178031	0.999965	MYB15	Transcription factor MYB15	3e-83	AT3G23250.1	myb domain protein 15	2e-84	IPR001005; IPR009057; IPR017930	GO:0003677,GO:0003682
MD01G1086800	754	1393	1619	606	598	549	0.699052	0.00776327	0.999965	MYC4	Transcription factor MYC4	8e-91	AT4G17880.1	Basic helix-loop-helix (bHLH) DNA-binding family protein	4e-92	IPR011598; IPR025610	GO:0046983
MD10G1075200	88	182	64	13	31	16	2.20511	9.20872e-05	0.220159		Transcription factor RADIALIS	3e-38	AT4G39250.1	RAD-like 1	6e-35	IPR001005; IPR009057; IPR017884	GO:0003677,GO:0003682
MD02G1087700	129	761	2003	118	231	279	1.65044	0.0131293	0.999965		Transcription factor TT2	5e-57	AT5G35550.1	Duplicated homeodomain-like superfamily protein	3e-58	IPR001005; IPR009057; IPR017930	GO:0003677,GO:0003682
MD13G1090000	33	24	8	4	3	1	2.80708	0.0052437	0.999965		Transcriptional regulator MraZ	0.25	AT1G23850.1	unknown protein; BEST Arabidopsis thaliana protein match is: unknown protein (TAIR:AT1G23840.1); Has 47 Blast hits to 40 proteins in 5 species: Archae -0; Bacteria -0; Metazoa -0; Fungi -0; Plants -47; Viruses -0; Other Eukaryotes -0 (source: NCBI BLink).	1e-31	0	noGo
MD15G1161200	244	223	313	124	139	146	0.551669	0.0495082	0.999965		Transmembrane protein DDB_G0292058	3e-06	AT2G12400.1	unknown protein; FUNCTIONS IN: molecular_function unknown; INVOLVED IN: biological_process unknown; LOCATED IN: endomembrane system; EXPRESSED IN: 25 plant structures; EXPRESSED DURING: 13 growth stages; BEST Arabidopsis thaliana protein match is: unknown protein (TAIR:AT2G25270.1); Has 177 Blast hits to 172 proteins in 23 species: Archae -0; Bacteria -2; Metazoa -3; Fungi -0; Plants -164; Viruse…	0.0	0	noGo
MD07G1023500	216	285	144	112	102	80	0.829505	0.0350569	0.999965		Triacylglycerol lipase 1	5e-17	AT2G15230.1	lipase 1	3e-18	0	noGo
MD03G1176400	156	314	351	132	141	132	0.61499	0.0493042	0.999965		tRNA-specific 2-thiouridylase MnmA	9e-122	AT1G51310.1	transferases;tRNA (5-methylaminomethyl-2-thiouridylate)-methyltransferases	0.0	IPR004506; IPR014729; IPR023382	GO:0016783,GO:0005737,GO:0008033,GO:0016740
MD04G1135200	51	56	23	13	17	7	1.57187	0.0143618	0.999965		Tropinone reductase homolog	5e-109	AT2G29360.1	NAD(P)-binding Rossmann-fold superfamily protein	4e-110	IPR002198; IPR002347; IPR016040; IPR020904	GO:0008152,GO:0016491,GO:0016491
MD06G1069700	157	183	443	97	62	113	1.02989	0.0219154	0.999965		Tryptophan 2,3-dioxygenase	7.1	AT1G63700.1	Protein kinase superfamily protein	3.0	0	noGo
MD03G1240600	258	167	205	102	42	40	1.44697	0.00224015	0.999965		Tyrosine-sulfated glycopeptide receptor 1	0.0	AT1G72300.1	Leucine-rich receptor-like protein kinase family protein	0.0	IPR001611; IPR003591; IPR013210; IPR025875	GO:0005515
MD05G1213200	180	286	317	132	133	115	0.661329	0.0122587	0.999965		Ubiquitin D	0.098	AT3G13235.1	ubiquitin family protein	2e-13	IPR000626; IPR019955	GO:0005515
MD13G1017300	58	27	24	2	2	4	3.46514	7.87734e-05	0.220159		U-box domain-containing protein 21	1e-122	AT5G37490.1	ARM repeat superfamily protein	6e-124	IPR003613; IPR011989; IPR013083; IPR016024	GO:0000151,GO:0004842,GO:0016567,GO:0005488
MD09G1137100	76	18	88	22	24	14	1.26523	0.0464878	0.999965		UDP-arabinose 4-epimerase 1	0.0	AT1G30620.1	NAD(P)-binding Rossmann-fold superfamily protein	0.0	IPR001509; IPR005886; IPR016040; IPR025308	GO:0003978,GO:0006012,GO:0003824,GO:0044237,GO:0050662
MD17G1129700	11	23	32	1	1	3	3.26675	0.00113892	0.841622		UDP-glycosyltransferase 71A16	0.0	AT3G21780.1	UDP-glucosyl transferase 71B6	6e-148	IPR002213	GO:0008152
MD17G1129500	16	36	136	2	22	0	2.67095	0.0158972	0.999965		UDP-glycosyltransferase 71A16	0.0	AT3G21760.1	UDP-Glycosyltransferase superfamily protein	4e-149	IPR002213	GO:0008152
MD15G1211400	46	46	128	25	27	12	1.38805	0.00737159	0.999965		UDP-glycosyltransferase 91C1	5e-153	AT5G49690.1	UDP-Glycosyltransferase superfamily protein	3e-154	IPR002213	GO:0008152
MD17G1211000	74	26	28	8	9	3	2.46835	0.00132186	0.866524		Umecyanin	3e-25	AT5G20230.1	blue-copper-binding protein	6e-25	IPR000923; IPR003245; IPR008972	GO:0005507,GO:0009055
MD17G1211300	71	32	31	10	0	0	3.46915	0.00310275	0.999965		Umecyanin	2e-25	AT5G20230.1	blue-copper-binding protein	6e-25	IPR000923; IPR003245; IPR008972	GO:0005507,GO:0009055
MD05G1208000	113	40	64	20	23	9	1.81949	0.00248784	0.999965		Uncharacterized endoplasmic reticulum membrane protein C16E8.02	6e-17	AT1G18720.1	Protein of unknown function (DUF962)	2e-72	IPR009305	noGo
MD00G1124900	95	80	49	30	13	22	1.45371	0.0118084	0.999965		Uncharacterized protein At5g19025	4e-15	AT3G01170.1	Ribosomal protein L34e superfamily protein	2e-74	IPR008195	GO:0003735,GO:0005622,GO:0005840,GO:0006412
MD15G1161900	11	28	25	4	8	5	1.5509	0.0387566	0.999965		Uncharacterized protein C19orf47 homolog	0.033	AT2G12462.1	BEST Arabidopsis thaliana protein match is: Sterile alpha motif (SAM) domain-containing protein (TAIR:AT1G15760.1); Has 35333 Blast hits to 34131 proteins in 2444 species: Archae -798; Bacteria -22429; Metazoa -974; Fungi -991; Plants -531; Viruses -0; Other Eukaryotes -9610 (source: NCBI BLink).	3e-46	IPR013761	noGo
MD16G1204700	342	310	532	176	288	183	0.5167	0.0428257	0.999965		Uncharacterized protein DDB_G0276777	0.01	AT4G14615.1	unknown protein; FUNCTIONS IN: molecular_function unknown; INVOLVED IN: biological_process unknown; LOCATED IN: endomembrane system; EXPRESSED IN: 24 plant structures; EXPRESSED DURING: 15 growth stages; CONTAINS InterPro DOMAIN/s: Protein of unknown function DUF2346 (InterPro:IPR018625); BEST Arabidopsis thaliana protein match is: unknown protein (TAIR:AT1G52825.1); Has 30201 Blast hits to 17322…	3e-40	IPR018625	noGo
MD06G1159400	7	13	1	0	0	0	4.98487	0.0163298	0.999965		Uncharacterized protein L728	5e-16	AT3G24780.1	Uncharacterised conserved protein UCP015417, vWA	2e-33	IPR024553	noGo
MD05G1321300	34	8	10	2	5	0	2.77572	0.0204294	0.999965		Uncharacterized protein ORF22	0.025	AT1G73860.1	P-loop containing nucleoside triphosphate hydrolases superfamily protein	0.69	0	noGo
MD09G1276200	30	27	36	6	17	10	1.17018	0.0493377	0.999965		Universal stress protein PHOS32	6e-12	AT3G03270.1	Adenine nucleotide alpha hydrolases-like superfamily protein	5e-56	IPR006015; IPR006016; IPR014729	GO:0006950
MD15G1122400	43	42	15	11	5	2	2.22742	0.00810081	0.999965		UPF0481 protein At3g47200	1e-60	AT4G31980.1	unknown protein; CONTAINS InterPro DOMAIN/s: Protein of unknown function DUF247, plant (InterPro:IPR004158), Protein of unknown function DUF862, eukaryotic (InterPro:IPR008580); BEST Arabidopsis thaliana protein match is: Plant protein of unknown function (DUF247) (TAIR:AT5G11290.1); Has 1967 Blast hits to 1844 proteins in 183 species: Archae -0; Bacteria -6; Metazoa -223; Fungi -83; Plants -1477…	8e-98	IPR004158	noGo
MD15G1122700	27	30	25	12	6	5	1.50111	0.025389	0.999965		UPF0481 protein At3g47200	1e-39	AT4G31980.1	unknown protein; CONTAINS InterPro DOMAIN/s: Protein of unknown function DUF247, plant (InterPro:IPR004158), Protein of unknown function DUF862, eukaryotic (InterPro:IPR008580); BEST Arabidopsis thaliana protein match is: Plant protein of unknown function (DUF247) (TAIR:AT5G11290.1); Has 1967 Blast hits to 1844 proteins in 183 species: Archae -0; Bacteria -6; Metazoa -223; Fungi -83; Plants -1477…	2e-58	IPR004158	noGo
MD15G1101800	77	45	62	35	7	11	1.44708	0.0339626	0.999965		UPF0481 protein At3g47200	6e-46	AT4G31980.1	unknown protein; CONTAINS InterPro DOMAIN/s: Protein of unknown function DUF247, plant (InterPro:IPR004158), Protein of unknown function DUF862, eukaryotic (InterPro:IPR008580); BEST Arabidopsis thaliana protein match is: Plant protein of unknown function (DUF247) (TAIR:AT5G11290.1); Has 1967 Blast hits to 1844 proteins in 183 species: Archae -0; Bacteria -6; Metazoa -223; Fungi -83; Plants -1477…	4e-84	IPR004158	noGo
MD05G1022600	5	1	52	0	0	1	5.19144	0.00513976	0.999965		UvrABC system protein A	1.8	AT5G45230.1	Disease resistance protein (TIR-NBS-LRR class) family	5e-05	0	noGo
MD16G1072500	182	223	229	91	173	53	0.723542	0.0421552	0.999965		Vacuolar amino acid transporter 1	6e-43	AT5G15240.1	Transmembrane amino acid transporter family protein	2e-143	IPR013057	noGo
MD17G1122500	256	483	728	122	226	128	1.24007	0.00021466	0.335555		Vacuolar cation/proton exchanger 2	7e-53	AT2G04220.1	Plant protein of unknown function (DUF868)	6e-141	IPR004837; IPR008586	GO:0016021,GO:0055085
MD04G1222300	38	17	10	1	1	0	4.82398	0.000501733	0.499497		Vacuolar protein sorting/targeting protein 10	0.66	AT4G14746.1	CONTAINS InterPro DOMAIN/s: EGF-like (InterPro:IPR006210); Has 259 Blast hits to 234 proteins in 55 species: Archae -0; Bacteria -0; Metazoa -184; Fungi -0; Plants -69; Viruses -0; Other Eukaryotes -6 (source: NCBI BLink).	1e-32	0	noGo
MD05G1244500	281	151	132	65	58	33	1.60355	0.000779608	0.660117		Vacuolar-sorting receptor 6	0.0	AT1G30900.1	VACUOLAR SORTING RECEPTOR 6	0.0	IPR001881; IPR003137; IPR018097; IPR026823	GO:0005509
MD05G1270400	8	4	16	2	0	0	3.39269	0.0361976	0.999965	RLK-WAK	Wall-associated receptor kinase 1	5e-09	AT1G21250.1	cell wall-associated kinase	3e-10	IPR025287	GO:0030247
MD08G1107900	145	66	33	21	23	12	1.9248	0.00425164	0.999965	RLK-WAK	Wall-associated receptor kinase 2	0.0	AT1G21270.1	wall-associated kinase 2	0.0	IPR000719; IPR000742; IPR001881; IPR002290; IPR008271; IPR011009; IPR013032; IPR020635; IPR025287	GO:0004672,GO:0005524,GO:0006468,GO:0004674,GO:0006468,GO:0030247,GO:0005515,GO:0005509,GO:0004713,GO:0006468
MD08G1107600	482	330	249	151	144	93	1.18496	0.00301216	0.999965	RLK-WAK	Wall-associated receptor kinase 2	8e-168	AT1G21270.1	wall-associated kinase 2	4e-169	IPR000719; IPR000742; IPR001881; IPR002290; IPR008271; IPR011009; IPR013032; IPR013320; IPR017441; IPR020635; IPR025287	GO:0005524,GO:0004672,GO:0005524,GO:0006468,GO:0004674,GO:0006468,GO:0030247,GO:0005515,GO:0005509,GO:0004713,GO:0006468
MD13G1212300	212	91	89	37	90	33	1.10118	0.0459734	0.999965		WAT1-related protein At5g07050	3e-85	AT5G07050.1	nodulin MtN21 /EamA-like transporter family protein	2e-86	IPR000620	GO:0016020
MD05G1349800	182	148	317	114	102	64	0.835131	0.0124553	0.999965	WRKY	WRKY transcription factor 6	7e-158	AT1G62300.1	WRKY family transcription factor	4e-159	IPR003657	GO:0003700,GO:0043565
MD04G1167700	155	136	198	69	80	49	0.965103	0.000813616	0.674853	WRKY	WRKY transcription factor WRKY24	5e-116	AT2G38470.1	WRKY DNA-binding protein 33	2e-115	IPR003657	GO:0003700,GO:0043565
MD10G1214700	7	11	13	1	0	0	4.46506	0.00526686	0.999965		Xylanolytic transcriptional activator xlnR homolog	1.6	AT3G22330.1	putative mitochondrial RNA helicase 2	0.13	0	noGo
MD03G1245500	69	28	34	5	4	0	3.6467	4.32268e-05	0.159715		Zinc finger BED domain-containing protein 6	0.024	AT2G27020.1	20S proteasome alpha subunit G1	1.1	0	noGo
MD07G1004800	14	1	4	0	0	0	4.87863	0.0232951	0.999965		Zinc finger protein 385A	6.0	AT3G01180.1	starch synthase 2	0.59	0	noGo
MD09G1140300	487	311	176	209	91	32	1.32834	0.0356025	0.999965		Zinc transporter 1	1e-137	AT3G12750.1	zinc transporter 1 precursor	8e-139	IPR003689; IPR004698	GO:0016020,GO:0030001,GO:0046873,GO:0055085,GO:0005385,GO:0016021,GO:0071577
MD13G1161190	61	38	12	10	11	2	2.10942	0.0149362	0.999965		#N/A	#N/A	#N/A	#N/A	#N/A	#N/A	noGo
MD01G1213130	111	30	53	18	25	9	1.68454	0.0109225	0.999965		#N/A	#N/A	#N/A	#N/A	#N/A	#N/A	noGo
MD01G1213110	360	312	210	131	51	60	1.54836	0.00142294	0.889734		#N/A	#N/A	#N/A	#N/A	#N/A	#N/A	noGo
MD02G1130410	46	39	148	22	35	22	1.13332	0.0365824	0.999965		#N/A	#N/A	#N/A	#N/A	#N/A	#N/A	noGo
MD11G1154100	5	5	14	0	0	0	5.00827	0.00692667	0.999965		#N/A	#N/A	#N/A	#N/A	#N/A	#N/A	noGo
MD04G1218100	4	5	6	0	0	0	4.39279	0.03264	0.999965		#N/A	#N/A	#N/A	#N/A	#N/A	#N/A	noGo
MD16G1211300	0	7	121	2	1	2	4.02902	0.00811762	0.999965		#N/A	#N/A	#N/A	#N/A	#N/A	#N/A	noGo
MD05G1015700	6	5	12	0	1	0	4.01433	0.0200418	0.999965		#N/A	#N/A	#N/A	#N/A	#N/A	#N/A	noGo
MD16G1153500	121	26	24	19	6	2	2.47868	0.00892806	0.999965		#N/A	#N/A	#N/A	#N/A	#N/A	#N/A	noGo
MD05G1125800	30	35	8	5	10	1	2.03104	0.0336389	0.999965		#N/A	#N/A	#N/A	#N/A	#N/A	#N/A	noGo
MD15G1051200	33	21	48	14	7	5	1.60147	0.0158521	0.999965		#N/A	#N/A	#N/A	#N/A	#N/A	#N/A	noGo
MD11G1311500	112	65	87	39	22	37	1.06392	0.0332495	0.999965		#N/A	#N/A	#N/A	#N/A	#N/A	#N/A	noGo
MD05G1252200	411	418	662	176	256	157	0.984849	1.19442e-05	0.0606808		#N/A	#N/A	#N/A	#N/A	#N/A	#N/A	noGo
MD06G1092600	201	199	265	114	136	112	0.516928	0.0348039	0.999965		#N/A	#N/A	#N/A	#N/A	#N/A	#N/A	noGo
MD16G1079500	157	179	215	170	236	202	-0.508006	0.0441845	0.999965		Xaa-Pro aminopeptidase 2	1.4	AT2G02590.1	FUNCTIONS IN: molecular_function unknown; INVOLVED IN: biological_process unknown; LOCATED IN: chloroplast; EXPRESSED IN: 21 plant structures; EXPRESSED DURING: 13 growth stages; CONTAINS InterPro DOMAIN/s: Putative small multi-drug export (InterPro:IPR009577); Has 405 Blast hits to 405 proteins in 185 species: Archae -65; Bacteria -295; Metazoa -0; Fungi -0; Plants -23; Viruses -0; Other Eukaryo…	8e-114	IPR009577	noGo
MD07G1178300	185	195	250	253	273	179	-0.508539	0.020783	0.999965		Nucleolar complex protein 2 homolog	5e-125	AT3G55510.1	Noc2p family	0.0	IPR005343	noGo
MD11G1255900	256	265	371	330	362	304	-0.530493	0.0122609	0.999965		Uncharacterized exonuclease domain-containing protein At3g15140	2e-130	AT3G15140.1	Polynucleotidyl transferase, ribonuclease H-like superfamily protein	1e-131	IPR006055; IPR012337; IPR013520	GO:0004527,GO:0003676
MD13G1265800	410	532	651	665	689	461	-0.546693	0.0049298	0.999965		Pathogenesis-related protein PR-1	7e-51	AT4G25780.1	CAP (Cysteine-rich secretory proteins, Antigen 5, and Pathogenesis-related 1 protein) superfamily protein	2e-77	IPR001283; IPR002413; IPR014044; IPR018244	GO:0005576
MD02G1217900	171	196	198	229	282	155	-0.555655	0.0238913	0.999965		Ethylene-responsive transcription factor ERF034	8e-68	AT2G44940.1	Integrase-type DNA-binding superfamily protein	5e-69	IPR001471; IPR016177	GO:0003700,GO:0003677
MD08G1224000	80	120	131	113	146	118	-0.558087	0.0461422	0.999965		Ribosomal RNA large subunit methyltransferase H	0.16	AT2G42760.1	unknown protein; CONTAINS InterPro DOMAIN/s: Protein of unknown function DUF1685 (InterPro:IPR012881); Has 170 Blast hits to 164 proteins in 34 species: Archae -0; Bacteria -1; Metazoa -26; Fungi -10; Plants -107; Viruses -0; Other Eukaryotes -26 (source: NCBI BLink).	2e-10	0	noGo
MD09G1074100	349	256	296	358	404	304	-0.560747	0.0444152	0.999965		Agamous-like MADS-box protein AGL8 homolog	2e-44	AT5G60910.1	AGAMOUS-like 8	4e-41	IPR002487	GO:0003700,GO:0005634
MD05G1193000	266	362	428	453	479	292	-0.564592	0.00928654	0.999965		Thioredoxin-like fold domain-containing protein MRL7, chloroplastic	1e-103	AT4G28590.1	FUNCTIONS IN: molecular_function unknown; INVOLVED IN: biological_process unknown; LOCATED IN: chloroplast; EXPRESSED IN: 21 plant structures; EXPRESSED DURING: 10 growth stages; BEST Arabidopsis thaliana protein match is: Thioredoxin superfamily protein (TAIR:AT2G31840.1); Has 114 Blast hits to 112 proteins in 39 species: Archae -2; Bacteria -0; Metazoa -17; Fungi -6; Plants -67; Viruses -0; Oth…	6e-105	0	noGo
MD02G1169800	604	467	952	932	837	555	-0.567795	0.0404351	0.999965		2-alkenal reductase (NADP(+)-dependent)	2e-154	AT5G16990.1	Zinc-binding dehydrogenase family protein	8e-148	IPR002085; IPR011032; IPR013149; IPR016040	GO:0008270,GO:0016491,GO:0055114
MD03G1176500	378	420	749	472	735	548	-0.571458	0.0262379	0.999965		GTPase Der	5e-153	AT3G12080.1	GTP-binding family protein	0.0	IPR005225; IPR006073; IPR015946; IPR016484; IPR027417	GO:0005525
MD03G1128900	518	465	887	870	692	569	-0.578934	0.0327552	0.999965		Superoxide dismutase [Cu-Zn], chloroplastic	1e-113	AT2G28190.1	copper/zinc superoxide dismutase 2	2e-104	IPR001424; IPR018152; IPR024134	GO:0004784,GO:0055114,GO:0006801,GO:0046872,GO:0055114
MD12G1209400	116	143	208	223	193	125	-0.581331	0.0414184	0.999965		Kinesin-like protein KIN-14I	0.0	AT2G47500.1	P-loop nucleoside triphosphate hydrolases superfamily protein with CH (Calponin Homology) domain	0.0	IPR001715; IPR001752; IPR027417; IPR027640	GO:0005515,GO:0003777,GO:0005524,GO:0007018,GO:0008017,GO:0003777,GO:0005871,GO:0007018
MD17G1185900	100	141	158	147	227	110	-0.606859	0.028614	0.999965		GATA transcription factor 9	4e-74	AT4G32890.1	GATA transcription factor 9	2e-75	IPR000679; IPR013088; IPR016679	GO:0003700,GO:0008270,GO:0043565,GO:0008270,GO:0003677,GO:0005634
MD09G1272100	690	533	736	631	751	931	-0.623813	0.0487673	0.999965		Armadillo segment polarity protein	6.6	AT5G15740.1	O-fucosyltransferase family protein	1.7	0	noGo
MD04G1043300	60	88	95	95	101	93	-0.628461	0.0408196	0.999965		Retrovirus-related Pol polyprotein from transposon TNT 1-94	2e-69	AT5G53670.1	unknown protein; FUNCTIONS IN: molecular_function unknown; INVOLVED IN: biological_process unknown; LOCATED IN: endomembrane system; EXPRESSED IN: sperm cell; Has 1807 Blast hits to 1807 proteins in 277 species: Archae -0; Bacteria -0; Metazoa -736; Fungi -347; Plants -385; Viruses -0; Other Eukaryotes -339 (source: NCBI BLink).	1e-09	IPR001584; IPR012337; IPR025724	GO:0015074,GO:0003676
MD16G1173100	93	105	119	102	149	132	-0.636185	0.0329401	0.999965		Probable receptor-like protein kinase At2g39360	2e-58	AT3G26700.1	Protein kinase superfamily protein	2e-121	IPR000719; IPR001245; IPR002290; IPR011009; IPR013320; IPR017441; IPR020635	GO:0004672,GO:0005524,GO:0006468,GO:0004672,GO:0006468,GO:0005524,GO:0004713,GO:0006468
MD00G1204600	242	180	260	274	328	242	-0.645257	0.0122059	0.999965		Cytochrome P450 78A6	0.0	AT2G46660.1	cytochrome P450, family 78, subfamily A, polypeptide 6	0.0	IPR001128; IPR002401; IPR017972	GO:0055114,GO:0005506,GO:0009055,GO:0020037,GO:0055114,GO:0005506,GO:0020037,GO:0055114
MD09G1009800	72	89	116	130	143	72	-0.657304	0.0304687	0.999965		Protein NUCLEAR FUSION DEFECTIVE 4	1e-38	AT3G01930.2	Major facilitator superfamily protein	0.0	IPR010658; IPR016196	noGo
MD16G1206700	816	989	824	1257	1503	647	-0.659473	0.0200701	0.999965		Auxin-responsive protein IAA14	9e-113	AT4G14550.1	indole-3-acetic acid inducible 14	5e-114	IPR003311; IPR011525	GO:0005634,GO:0046983
MD11G1251000	93	84	118	139	101	119	-0.670506	0.0464896	0.999965		GTPase Obg	0.13	AT3G45900.1	Ribonuclease P protein subunit P38-related	1.4	0	noGo
MD16G1086800	180	161	261	247	296	213	-0.689375	0.00323631	0.999965		Protein PLASTID REDOX INSENSITIVE 2	7e-69	AT1G10522.1	unknown protein; FUNCTIONS IN: molecular_function unknown; INVOLVED IN: biological_process unknown; LOCATED IN: chloroplast; EXPRESSED IN: 23 plant structures; EXPRESSED DURING: 13 growth stages; Has 24 Blast hits to 24 proteins in 8 species: Archae -0; Bacteria -0; Metazoa -0; Fungi -0; Plants -24; Viruses -0; Other Eukaryotes -0 (source: NCBI BLink).	4e-70	0	noGo
MD07G1178200	823	821	1068	1262	1460	787	-0.698313	0.000679493	0.602401		#N/A	#N/A	#N/A	#N/A	#N/A	#N/A	#N/A
MD01G1068500	85	67	108	114	147	76	-0.700571	0.0255837	0.999965		Soyasaponin III rhamnosyltransferase	2e-115	AT2G22590.1	UDP-Glycosyltransferase superfamily protein	2e-106	IPR002213	GO:0008152
MD03G1031900	149	141	108	175	232	128	-0.708371	0.0327432	0.999965		Phosphoribosylformylglycinamidine synthase subunit PurQ	0.15	AT4G04404.1	C2H2 and C2HC zinc fingers superfamily protein	1.2	0	noGo
MD11G1219200	97	111	115	160	151	109	-0.72178	0.00886672	0.999965		Putative high mobility group B protein 11	0.026	AT5G54930.1	AT hook motif-containing protein	5e-31	0	noGo
MD03G1038600	1406	1029	1581	2102	1631	1462	-0.729628	0.00711866	0.999965		Heavy metal-associated isoprenylated plant protein 47	1e-09	AT3G20180.1	Copper transport protein family	7e-11	0	noGo
MD15G1362600	140	244	221	184	242	329	-0.736253	0.0496609	0.999965		2-succinyl-5-enolpyruvyl-6-hydroxy-3-cyclohexene-1-carboxylate synthase	0.99	AT4G14150.1	phragmoplast-associated kinesin-related protein 1	1.3	0	noGo
MD08G1144000	92	186	290	208	255	238	-0.738783	0.0363143	0.999965		6-phosphogluconolactonase	2.3	AT1G10520.1	DNA polymerase lambda (POLL)	0.43	0	noGo
MD16G1217700	169	155	215	134	325	249	-0.744842	0.03527	0.999965		Cryptochrome-2	1e-82	AT1G04400.2	cryptochrome 2	6e-84	IPR005101	GO:0003913,GO:0006281
MD06G1176400	43	56	82	63	108	66	-0.74968	0.0290692	0.999965		Polygalacturonase 1 beta-like protein 3	0.0	AT1G70370.1	polygalacturonase 2	0.0	IPR004873	noGo
MD11G1296600	55	52	77	89	73	79	-0.777109	0.0269987	0.999965		Protein SLOW WALKER 1	0.0	AT2G47990.1	transducin family protein / WD-40 repeat family protein	0.0	IPR001680; IPR015943; IPR017986; IPR018983; IPR020472	GO:0005515,GO:0005730,GO:0006364
MD11G1129900	37	32	62	61	56	54	-0.77933	0.0483839	0.999965		(R)-specific enoyl-CoA hydratase	1e-22	AT5G60335.1	Thioesterase superfamily protein	1e-67	IPR002539	GO:0008152,GO:0016491
MD16G1113800	336	273	443	404	475	502	-0.780432	0.00527326	0.999965		Aspartic proteinase-like protein 2	5e-72	AT2G36670.1	Eukaryotic aspartyl protease family protein	9e-146	IPR001461; IPR001969; IPR021109	GO:0004190,GO:0006508
MD10G1073700	46	41	57	71	70	54	-0.791246	0.0232972	0.999965		Laccase-11	0.0	AT5G03260.1	laccase 11	0.0	IPR001117; IPR002355; IPR008972; IPR011706; IPR011707; IPR017761	GO:0005507,GO:0005507,GO:0016491,GO:0055114,GO:0016491,GO:0055114,GO:0046274,GO:0048046,GO:0052716,GO:0055114
MD13G1086700	171	182	257	217	269	312	-0.792039	0.00901483	0.999965		Protein PLASTID REDOX INSENSITIVE 2	4e-67	AT1G10522.1	unknown protein; FUNCTIONS IN: molecular_function unknown; INVOLVED IN: biological_process unknown; LOCATED IN: chloroplast; EXPRESSED IN: 23 plant structures; EXPRESSED DURING: 13 growth stages; Has 24 Blast hits to 24 proteins in 8 species: Archae -0; Bacteria -0; Metazoa -0; Fungi -0; Plants -24; Viruses -0; Other Eukaryotes -0 (source: NCBI BLink).	2e-68	0	noGo
MD16G1217800	87	110	141	92	256	131	-0.830783	0.0236668	0.999965		Cryptochrome-2	3e-129	AT1G04400.2	cryptochrome 2	2e-130	IPR005101; IPR006050; IPR014729	GO:0003913,GO:0006281
MD15G1314700	77	71	61	122	140	52	-0.853676	0.0369364	0.999965		Casein kinase II subunit alpha	1e-23	AT2G23070.1	Protein kinase superfamily protein	6e-17	IPR000719; IPR011009; IPR017441	GO:0005524,GO:0004672,GO:0005524,GO:0006468
MD15G1416700	36	44	87	64	109	60	-0.854676	0.0271085	0.999965		Glycine cleavage system H protein, mitochondrial (Fragment)	1e-32	AT2G35370.1	glycine decarboxylase complex H	4e-33	IPR002930; IPR003016; IPR011053	GO:0005960,GO:0006546
MD05G1182300	67	117	199	129	262	144	-0.865415	0.0197522	0.999965		Transcription factor PIF1	9e-83	AT2G20180.2	phytochrome interacting factor 3-like 5	5e-84	IPR011598; IPR024097; IPR024102	GO:0046983
MD07G1027700	58	61	90	49	123	119	-0.868482	0.0497285	0.999965		Protein TolB	6.6	AT1G63980.1	D111/G-patch domain-containing protein	2.1	0	noGo
MD13G1112500	341	416	532	505	555	741	-0.902657	0.00321838	0.999965		Telomere replication protein EST3	1.1	AT4G14150.1	phragmoplast-associated kinesin-related protein 1	0.74	0	noGo
MD05G1149400	19	30	32	28	58	34	-0.90913	0.0494531	0.999965		Uncharacterized protein ycf55	1.5	AT2G46560.1	transducin family protein / WD-40 repeat family protein	0.056	0	noGo
MD05G1219400	118	330	233	183	553	286	-0.910331	0.0374977	0.999965		Glycosyltransferase 6	2e-175	AT4G37690.1	Galactosyl transferase GMA12/MNN10 family protein	1e-176	IPR008630	GO:0016021
MD00G1131900	26	21	44	41	49	41	-0.910491	0.0364355	0.999965		Histone deacetylase complex subunit SAP18	4e-43	AT2G45640.1	SIN3 associated polypeptide P18	2e-44	IPR010516	noGo
MD16G1222400	42	63	118	81	110	118	-0.913896	0.0245634	0.999965		UPF0229 protein PST_0721	0.023	AT1G29070.1	Ribosomal protein L34	0.048	IPR004252	noGo
MD00G1203600	27	29	32	44	35	48	-0.919998	0.0461779	0.999965		Putative disease resistance RPP13-like protein 1	7e-93	AT3G14470.1	NB-ARC domain-containing disease resistance protein	4e-94	0	noGo
MD07G1120700	57	89	121	95	188	111	-0.923401	0.00621576	0.999965		Protein NSP-INTERACTING KINASE 2	3e-68	AT2G45340.1	Leucine-rich repeat protein kinase family protein	0.0	IPR000719; IPR001245; IPR001611; IPR002290; IPR011009; IPR013210; IPR013320; IPR020635	GO:0004672,GO:0005524,GO:0006468,GO:0004672,GO:0006468,GO:0005515,GO:0004713,GO:0006468
MD10G1018400	55	39	100	91	84	99	-0.923865	0.0247992	0.999965		Disease resistance protein RPP5	0.001	AT5G45230.1	Disease resistance protein (TIR-NBS-LRR class) family	4e-07	0	noGo
MD11G1266500	191	91	126	289	207	143	-0.939789	0.0277218	0.999965		Isocitrate dehydrogenase [NADP]	5e-14	AT1G65930.1	cytosolic NADP+-dependent isocitrate dehydrogenase	6e-15	IPR004790; IPR024084	GO:0055114,GO:0004450,GO:0006102,GO:0055114
MD03G1019300	47	75	56	107	120	51	-0.945415	0.0157547	0.999965		Tyrosine-sulfated glycopeptide receptor 1	1e-58	AT1G17250.1	receptor like protein 3	3e-60	IPR001611; IPR003591; IPR013210	GO:0005515
MD13G1044700	59	50	123	92	97	138	-0.951179	0.0279977	0.999965		#N/A	#N/A	#N/A	#N/A	#N/A	#N/A	#N/A
MD16G1088900	78	31	113	100	105	119	-0.955443	0.0431438	0.999965		WAT1-related protein At5g40240	5e-82	AT5G40240.2	nodulin MtN21 /EamA-like transporter family protein	4e-83	IPR000620	GO:0016020
MD15G1401000	78	157	122	185	296	89	-0.960275	0.0165951	0.999965		F-box/kelch-repeat protein At5g03020	1.1	AT5G03020.1	Galactose oxidase/kelch repeat superfamily protein	0.062	IPR012871	noGo
MD12G1189500	34	44	62	53	76	81	-0.990317	0.012906	0.999965		0	0	0	0	0	0	noGo
MD07G1094100	70	91	57	117	126	104	-0.995439	0.00576228	0.999965		Eukaryotic translation initiation factor 4G	4e-14	AT3G60240.4	eukaryotic translation initiation factor 4G	4e-15	0	noGo
MD05G1079100	24	36	59	49	96	43	-1.01195	0.0186395	0.999965		B3 domain-containing protein Os01g0234100	2e-77	AT3G19184.1	AP2/B3-like transcriptional factor family protein	7e-32	IPR003340; IPR015300	GO:0003677
MD13G1154700	14	15	28	30	28	29	-1.01805	0.0487707	0.999965		Receptor-like protein kinase ANXUR1	0.0	AT3G04690.1	Malectin/receptor-like protein kinase family protein	0.0	IPR000719; IPR001245; IPR002290; IPR008271; IPR011009; IPR013320; IPR017441; IPR020635; IPR024788	GO:0005524,GO:0004672,GO:0005524,GO:0006468,GO:0004672,GO:0006468,GO:0004674,GO:0006468,GO:0004713,GO:0006468
MD14G1191300	28	40	26	34	71	51	-1.0506	0.0264965	0.999965		Protein ACTIVITY OF BC1 COMPLEX KINASE 3, chloroplastic	2e-10	AT3G24190.1	Protein kinase superfamily protein	1e-20	IPR000719; IPR002575	GO:0004672,GO:0005524,GO:0006468
MD17G1027900	183	139	183	263	150	390	-1.10307	0.0178134	0.999965		Ankyrin repeat-containing protein NPR4	7e-11	AT3G18670.1	Ankyrin repeat family protein	2e-125	IPR002110; IPR020683; IPR025314; IPR026961; IPR027001	GO:0005515
MD00G1092800	19	24	20	24	64	25	-1.12013	0.0369962	0.999965		Ribosomal large subunit pseudouridine synthase C	0.97	AT1G19980.1	cytomatrix protein-related	3e-10	0	noGo
MD07G1095100	86	27	55	169	79	57	-1.15574	0.0485552	0.999965		Cytochrome P450 714A1	2e-169	AT5G24910.1	cytochrome P450, family 714, subfamily A, polypeptide 1	9e-171	IPR001128; IPR002401; IPR017972	GO:0055114,GO:0005506,GO:0009055,GO:0020037,GO:0055114,GO:0005506,GO:0020037,GO:0055114
MD15G1044800	11	17	11	27	27	17	-1.18711	0.0418398	0.999965		Ribosomal RNA small subunit methyltransferase A	0.096	AT5G24970.2	Protein kinase superfamily protein	5e-17	0	noGo
MD11G1144500	7	17	30	29	29	35	-1.24491	0.037056	0.999965		tRNA pseudouridine synthase A	3.8	AT5G15390.1	tRNA/rRNA methyltransferase (SpoU) family protein	2e-35	0	noGo
MD14G1207400	24	56	32	22	86	97	-1.25665	0.0480163	0.999965		Uridylate kinase	3.4	AT3G21670.1	Major facilitator superfamily protein	1.2	0	noGo
MD07G1094000	15	18	10	18	37	28	-1.25719	0.0376873	0.999965		Eukaryotic translation initiation factor 4G	2e-27	AT3G60240.4	eukaryotic translation initiation factor 4G	1e-28	0	noGo
MD05G1080800	21	25	21	49	38	40	-1.28209	0.0062841	0.999965		0	0	0	0	0	0	noGo
MD16G1207000	11	12	18	32	28	19	-1.31	0.0163316	0.999965		Magnesium transporter MRS2-2	0.0	AT5G64560.1	magnesium transporter 9	0.0	IPR002523; IPR026573	GO:0016020,GO:0030001,GO:0046873,GO:0055085,GO:0015095,GO:0015693
MD00G1004000	22	23	34	44	25	81	-1.40805	0.0216981	0.999965		SCAN domain-containing protein 3	0.094	AT5G33406.1	hAT dimerisation domain-containing protein / transposase-related	4e-19	IPR008906; IPR012337	GO:0003676,GO:0046983
MD12G1035700	17	10	11	14	40	29	-1.42645	0.0296388	0.999965		Pentatricopeptide repeat-containing protein At4g33170	2e-172	AT4G33170.1	Tetratricopeptide repeat (TPR)-like superfamily protein	1e-173	IPR002885; IPR011990	GO:0005515
MD07G1094200	16	16	6	25	27	31	-1.44286	0.0294928	0.999965		Eukaryotic translation initiation factor 4G	7e-16	AT3G60240.4	eukaryotic translation initiation factor 4G	4e-17	0	noGo
MD15G1108200	6	11	10	11	29	18	-1.44383	0.0353297	0.999965		Kinesin-like protein KIN-7K, chloroplastic	5.3	AT5G41650.1	Lactoylglutathione lyase / glyoxalase I family protein	1e-67	IPR025870	noGo
MD11G1026100	19	23	20	97	22	18	-1.49015	0.0393667	0.999965		DEAD-box ATP-dependent RNA helicase 20	5e-143	AT1G55150.1	DEA(D/H)-box RNA helicase family protein	5e-141	IPR001650; IPR011545; IPR014001; IPR014014; IPR027417	GO:0003676,GO:0005524,GO:0008026,GO:0003676,GO:0004386,GO:0005524
MD17G1179700	7	11	7	19	26	13	-1.51987	0.0220127	0.999965		Inositol oxygenase 5	9e-86	AT5G56640.1	myo-inositol oxygenase 5	5e-87	IPR007828	GO:0005506,GO:0005737,GO:0019310,GO:0050113,GO:0055114
MD00G1000900	4	5	10	14	15	13	-1.54774	0.0384785	0.999965		Regulator of nonsense transcripts 1	5.6	AT5G08300.1	Succinyl-CoA ligase, alpha subunit	1.7	0	noGo
MD06G1221600	4	7	10	21	19	8	-1.5487	0.0387086	0.999965		Putative sperm motility kinase W	1.2	AT5G63560.1	HXXXD-type acyl-transferase family protein	0.3	IPR005135	noGo
MD03G1237900	4	27	21	43	29	42	-1.58199	0.0194833	0.999965		Threonine--tRNA ligase	1.1	AT4G02410.1	Concanavalin A-like lectin protein kinase family protein	0.7	0	noGo
MD13G1258800	9	10	12	8	20	43	-1.65366	0.0392763	0.999965		Sclerostin domain-containing protein 1	5.8	AT4G15550.1	indole-3-acetate beta-D-glucosyltransferase	2.2	0	noGo
MD05G1224800	34	16	17	94	34	42	-1.6576	0.00898961	0.999965		THO complex subunit 2	0.36	AT1G51780.1	IAA-leucine resistant (ILR)-like gene 5	0.68	0	noGo
MD08G1022900	7	5	11	20	7	26	-1.683	0.0427145	0.999965		Probable GTP-binding protein OBGC2	1e-10	AT2G34560.2	P-loop containing nucleoside triphosphate hydrolases superfamily protein	1.1	IPR006169	GO:0005525
MD16G1192100	94	238	114	303	800	142	-1.69509	0.00147548	0.908606		Primary amine oxidase	3e-173	AT1G31690.1	Copper amine oxidase family protein	9e-177	IPR000269; IPR015798; IPR015800; IPR015801; IPR015802; IPR016182	GO:0005507,GO:0008131,GO:0009308,GO:0048038,GO:0055114,GO:0005507,GO:0009308,GO:0048038
MD16G1168500	5	7	3	12	21	8	-1.71182	0.0411199	0.999965		0	0	0	0	0	0	noGo
MD05G1202500	2	18	11	15	57	16	-1.7981	0.030567	0.999965		Transcription factor bHLH3	7e-47	AT4G16430.1	basic helix-loop-helix (bHLH) DNA-binding superfamily protein	4e-48	IPR025610	noGo
MD03G1093800	16	26	7	61	16	54	-1.80065	0.018317	0.999965		Metallothionein-like protein type 2	2e-17	AT3G09390.1	metallothionein 2A	3e-09	IPR000347	GO:0046872
MD17G1249300	30	20	12	55	23	88	-1.81203	0.0110766	0.999965		G-type lectin S-receptor-like serine/threonine-protein kinase At1g61390	4e-129	AT1G61390.1	S-locus lectin protein kinase family protein	3e-130	IPR000719; IPR001245; IPR002290; IPR008271; IPR011009; IPR020635	GO:0004672,GO:0005524,GO:0006468,GO:0004672,GO:0006468,GO:0004674,GO:0006468,GO:0004713,GO:0006468
MD16G1204800	3	10	14	15	33	24	-1.81994	0.00922565	0.999965		0	0	0	0	0	0	noGo
MD00G1103200	3	10	5	31	10	9	-1.83933	0.0397333	0.999965		0	0	0	0	0	0	noGo
MD11G1025800	0	6	14	14	25	17	-1.95553	0.0417197	0.999965		Pentatricopeptide repeat-containing protein DOT4, chloroplastic	1e-60	AT4G18750.1	Pentatricopeptide repeat (PPR) superfamily protein	6e-62	IPR002885	noGo
MD00G1064300	3	8	3	12	7	22	-1.98804	0.0366907	0.999965		Glutamate carboxypeptidase 2 homolog	0.57	AT3G51490.2	tonoplast monosaccharide transporter3	1.9	0	noGo
MD00G1065500	7	37	59	80	10	178	-2.01989	0.0277523	0.999965		Abrin-c	3e-36	AT2G21500.2	RING/U-box superfamily protein	1.5	IPR001574; IPR016138; IPR016139; IPR017989	GO:0017148,GO:0030598,GO:0030598
MD14G1026800	0	6	9	19	19	8	-2.02996	0.0408918	0.999965		0	0	0	0	0	0	noGo
MD12G1163000	61	15	40	307	25	54	-2.06512	0.0151991	0.999965		(-)-germacrene D synthase	0.0	AT5G23960.1	terpene synthase 21	1e-132	IPR001906; IPR005630; IPR008930; IPR008949	GO:0000287,GO:0010333,GO:0016829,GO:0008152,GO:0010333,GO:0016829
MD16G1224300	66	33	50	260	164	120	-2.18238	7.87251e-07	0.0106654		NADPH-dependent 7-cyano-7-deazaguanine reductase	1.5	AT2G33420.1	Protein of unknown function (DUF810)	0.0	IPR008528; IPR014770; IPR014772	noGo
MD04G1164300	1	2	5	7	13	8	-2.20659	0.0319678	0.999965		Protein TIC 56, chloroplastic	1e-39	AT5G01590.1	unknown protein; FUNCTIONS IN: molecular_function unknown; INVOLVED IN: biological_process unknown; LOCATED IN: chloroplast, chloroplast envelope; EXPRESSED IN: 22 plant structures; EXPRESSED DURING: 13 growth stages; Has 60 Blast hits to 59 proteins in 31 species: Archae -0; Bacteria -20; Metazoa -1; Fungi -2; Plants -33; Viruses -0; Other Eukaryotes -4 (source: NCBI BLink).	6e-41	0	noGo
MD03G1077700	4	1	10	17	20	17	-2.2719	0.00686064	0.999965		Calmodulin-binding receptor-like cytoplasmic kinase 1	8e-143	AT5G58940.1	calmodulin-binding receptor-like cytoplasmic kinase 1	4e-144	IPR000719; IPR001245; IPR002290; IPR008271; IPR011009; IPR017441; IPR020635	GO:0004672,GO:0005524,GO:0006468,GO:0004672,GO:0006468,GO:0004674,GO:0006468,GO:0005524,GO:0004713,GO:0006468
MD15G1089700	4	4	6	18	14	21	-2.33513	0.00231267	0.999965		F-box protein CPR30	1e-20	AT4G12560.1	F-box and associated interaction domains-containing protein	8e-22	IPR001810; IPR006527; IPR017451	GO:0005515
MD09G1133600	2	0	6	4	10	17	-2.47234	0.0457147	0.999965		Heavy metal-associated isoprenylated plant protein 41	7e-60	AT1G55790.1	Domain of unknown function (DUF2431)	4e-61	IPR019446	noGo
MD01G1107700	0	3	3	3	13	10	-2.52777	0.0435354	0.999965		BTB/POZ domain-containing protein At5g03250	0.0	AT5G03250.1	Phototropic-responsive NPH3 family protein	0.0	IPR000210; IPR011333; IPR013069; IPR027356	GO:0005515
MD06G1096800	2	3	2	19	5	10	-2.67303	0.0114668	0.999965		Probable Xaa-Pro aminopeptidase CPSG_02684	4.2	AT1G31810.1	Formin Homology 14	1.1	0	noGo
MD11G1116900	2	1	2	14	2	8	-2.68556	0.034358	0.999965		BAHD acyltransferase At5g47980	1e-76	AT3G26040.1	HXXXD-type acyl-transferase family protein	2e-102	IPR003480; IPR023213	noGo
MD17G1029200	8	3	14	24	2	85	-2.7549	0.0125772	0.999965		Ankyrin repeat-containing protein ITN1	3e-08	AT3G18670.1	Ankyrin repeat family protein	1e-93	IPR020683; IPR026961	noGo
MD09G1115100	0	4	3	21	3	14	-2.93634	0.0166481	0.999965		#N/A	#N/A	#N/A	#N/A	#N/A	#N/A	#N/A
MD06G1234000	1	1	2	10	3	12	-3.12492	0.0139338	0.999965		Type IV inositol polyphosphate 5-phosphatase 9	3e-139	AT2G01900.1	DNAse I-like superfamily protein	2e-140	IPR000300; IPR005135	GO:0046856
MD11G1184400	0	1	3	4	3	16	-3.13809	0.0319331	0.999965		#N/A	#N/A	#N/A	#N/A	#N/A	#N/A	#N/A
MD17G1209000	2	1	0	5	13	5	-3.14359	0.0238481	0.999965		Ethylene-responsive transcription factor WIN1	1e-76	AT1G15360.1	Integrase-type DNA-binding superfamily protein	6e-78	IPR001471; IPR016177	GO:0003700,GO:0003677
MD15G1090300	0	2	2	14	5	12	-3.42975	0.00580364	0.999965		Putative disease resistance RPP13-like protein 1	6e-32	AT3G14470.1	NB-ARC domain-containing disease resistance protein	3e-33	IPR025875	noGo
MD07G1147900	2	0	0	6	5	7	-3.45816	0.0354033	0.999965		Autophagy protein 5	0.33	AT2G42210.2	Mitochondrial import inner membrane translocase subunit Tim17/Tim22/Tim23 family protein	0.4	0	noGo
MD04G1181100	0	1	2	5	2	15	-3.46876	0.0234642	0.999965		Heat stress transcription factor C-1a	0.0004	AT3G63350.1	winged-helix DNA-binding transcription factor family protein	0.005	IPR011991	noGo
MD09G1183700	0	0	3	1	17	7	-3.48879	0.0400721	0.999965		AP2-like ethylene-responsive transcription factor AIL1	1e-132	AT1G72570.1	Integrase-type DNA-binding superfamily protein	6e-134	IPR001471; IPR016177	GO:0003700,GO:0003677
MD14G1086800	6	2	0	25	6	41	-3.52641	0.0026083	0.999965		Protein CHROMATIN REMODELING 19	2e-31	AT2G02090.1	SNF2 domain-containing protein / helicase domain-containing protein	1e-32	IPR001650; IPR027417	GO:0003676,GO:0004386,GO:0005524
MD14G1055700	1	0	1	3	7	9	-3.65013	0.0195709	0.999965		Probable nucleoredoxin 1-2	0.0005	AT2G27660.1	Cysteine/Histidine-rich C1 domain family protein	1e-37	IPR011424	GO:0047134,GO:0055114
MD11G1254000	1	1	0	2	11	8	-3.67396	0.0198703	0.999965		Transcription factor MYC4	4e-63	AT4G17880.1	Basic helix-loop-helix (bHLH) DNA-binding family protein	2e-64	IPR011598; IPR025610	GO:0046983
MD17G1155600	2	0	0	20	2	1	-3.73855	0.04909	0.999965		NA	NA	AT3G14360.1	alpha/beta-Hydrolases superfamily protein	7e-17	0	noGo
MD00G1124600	0	1	0	1	6	6	-3.96526	0.043334	0.999965		0	0	0	0	0	0	noGo
MD10G1158000	1	0	0	4	5	5	-4.06907	0.0243349	0.999965		Probable glucan endo-1,3-beta-glucosidase A6	3e-27	AT3G07320.1	O-Glycosyl hydrolases family 17 protein	3e-32	IPR000490; IPR013781; IPR017853	GO:0003824,GO:0005975,GO:0005975
MD13G1151800	0	1	0	7	6	4	-4.32057	0.0130128	0.999965		0	0	0	0	0	0	noGo
MD09G1013500	0	6	0	47	1	41	-4.34416	0.00371326	0.999965		UPF0481 protein At3g47200	1e-46	AT3G50120.1	Plant protein of unknown function (DUF247)	3e-73	IPR004158	noGo
MD00G1082500	0	0	0	3	5	2	-4.47282	0.0444643	0.999965		Tyrosine-sulfated glycopeptide receptor 1	3e-69	AT1G17250.1	receptor like protein 3	2e-77	IPR001611	GO:0005515
MD10G1019800	0	0	0	2	4	4	-4.54759	0.0387352	0.999965		L-type lectin-domain containing receptor kinase S.6	5e-30	AT5G42120.1	Concanavalin A-like lectin protein kinase family protein	3e-31	IPR001220; IPR008985; IPR013320	GO:0030246
MD17G1119700	1	0	0	3	12	7	-4.66867	0.00619551	0.999965		Probable cinnamyl alcohol dehydrogenase 1	0.0	AT1G72680.1	cinnamyl-alcohol dehydrogenase	0.0	IPR002085; IPR002328; IPR006140; IPR011032; IPR013149; IPR013154; IPR016040; IPR020843	GO:0048037,GO:0055114,GO:0016491,GO:0008270,GO:0016491,GO:0055114,GO:0016491,GO:0055114
MD02G1050600	0	0	1	18	0	3	-4.68523	0.0310419	0.999965		Short-chain dehydrogenase TIC 32, chloroplastic	6e-34	AT4G27760.1	NAD(P)-binding Rossmann-fold superfamily protein	3e-126	IPR002198; IPR002347; IPR016040	GO:0008152,GO:0016491
MD03G1028200	0	0	0	2	6	4	-4.77051	0.0236075	0.999965		F-box protein CPR30	2e-26	AT4G12560.1	F-box and associated interaction domains-containing protein	1e-27	IPR001810; IPR013187; IPR017451	GO:0005515
MD06G1044200	0	0	0	1	2	8	-4.81602	0.0342813	0.999965		Beta-amylase 3, chloroplastic	3e-60	AT4G17090.1	chloroplast beta-amylase	2e-61	IPR001554; IPR013781; IPR017853	GO:0003824,GO:0005975,GO:0000272,GO:0016161
MD12G1094100	0	0	0	3	14	0	-5.08917	0.0431551	0.999965		Pyrroline-5-carboxylate reductase	9e-55	AT5G14800.1	pyrroline-5 -carboxylate (P5C) reductase	5e-56	IPR000304; IPR008927	GO:0055114,GO:0004735,GO:0006561,GO:0055114
MD08G1055000	0	0	0	7	0	7	-5.15346	0.0368615	0.999965		Probable folate-biopterin transporter 6	0.0	AT5G10820.1	Major facilitator superfamily protein	0.0	IPR004324; IPR016196	noGo
MD02G1233800	0	0	0	10	11	0	-5.47572	0.0172658	0.999965		AUGMIN subunit 7	3e-116	AT5G17620.1	CONTAINS InterPro DOMAIN/s: Plant nuclear matrix 1 (InterPro:IPR010604); Has 30201 Blast hits to 17322 proteins in 780 species: Archae -12; Bacteria -1396; Metazoa -17338; Fungi -3422; Plants -5037; Viruses -0; Other Eukaryotes -2996 (source: NCBI BLink).	2e-117	IPR010604	noGo
MD16G1274000	0	0	0	6	2	10	-5.50063	0.00435033	0.999965		Baseplate tail-tube junction protein gp48	1.1	AT5G41960.1	unknown protein; FUNCTIONS IN: molecular_function unknown; INVOLVED IN: biological_process unknown; LOCATED IN: chloroplast; EXPRESSED IN: 22 plant structures; EXPRESSED DURING: 13 growth stages; Has 1807 Blast hits to 1807 proteins in 277 species: Archae -0; Bacteria -0; Metazoa -736; Fungi -347; Plants -385; Viruses -0; Other Eukaryotes -339 (source: NCBI BLink).	2e-39	0	noGo
MD07G1197200	0	0	0	3	1	15	-5.65117	0.00634558	0.999965		Heat shock cognate 70 kDa protein	0.0	AT3G12580.1	heat shock protein 70	0.0	IPR013126; IPR018181	noGo
MD10G1290600	0	0	0	24	0	0	-5.80111	0.0439664	0.999965		Ethylene-responsive transcription factor 4	0.063	AT4G01470.1	tonoplast intrinsic protein 1;3	1.5	0	noGo
MD09G1267900	0	0	0	16	0	7	-5.82128	0.0097563	0.999965		U3 small nucleolar RNA-associated protein 7	0.0007	AT3G10530.1	Transducin/WD40 repeat-like superfamily protein	1e-20	0	noGo
MD02G1046800	0	0	0	18	12	0	-6.02198	0.00495205	0.999965		0	0	0	0	0	0	noGo
MD08G1224400	0	0	0	34	0	0	-6.30356	0.0202361	0.999965		WAT1-related protein At1g68170	3e-54	AT1G68170.1	nodulin MtN21 /EamA-like transporter family protein	2e-55	IPR000620	GO:0016020
MD05G1222900	0	0	0	19	19	0	-6.33605	0.00204405	0.999965		High mobility group B protein 6	0.002	AT5G01910.1	unknown protein; Has 66 Blast hits to 66 proteins in 27 species: Archae -0; Bacteria -2; Metazoa -18; Fungi -7; Plants -29; Viruses -0; Other Eukaryotes -10 (source: NCBI BLink).	8e-31	0	noGo
MD00G1169700	0	0	0	149	21	1	-8.60403	0.00157437	0.931416		Cytochrome P450 CYP736A12	2e-166	AT5G07990.1	Cytochrome P450 superfamily protein	3e-121	IPR001128; IPR002401; IPR017972	GO:0055114,GO:0005506,GO:0009055,GO:0020037,GO:0055114,GO:0005506,GO:0020037,GO:0055114
MD07G1170200	0	0	0	92	102	0	-8.6757	0.0264311	0.999965		Glycerol-3-phosphate dehydrogenase SDP6, mitochondrial	0.0	AT3G10370.1	FAD-dependent oxidoreductase family protein	0.0	IPR000447; IPR006076	GO:0004368,GO:0006072,GO:0009331,GO:0055114,GO:0016491,GO:0055114

## Sheet: GO enrichment
GO.ID	Term	Annotated	Significant	Expected	Rank in classic	classic	KS	weight	DEG_group	LogFC range	Genes_sign
GO:0046274	lignin catabolic process	47	1	0.02	1	0.023	0.090	0.023	Group_k	[5,7]	MD01G1235200
GO:0006662	glycerol ether metabolic process	74	1	0.04	6	0.036	0.078	0.036	Group_k	[5,7]	MD17G1248400
GO:0009698	phenylpropanoid metabolic process	47	1	0.02	2	0.023	0.090	1.000	Group_k	[5,7]	MD01G1235200
GO:0009808	lignin metabolic process	47	1	0.02	3	0.023	0.090	1.000	Group_k	[5,7]	MD01G1235200
GO:0018904	ether metabolic process	74	1	0.04	7	0.036	0.078	1.000	Group_k	[5,7]	MD17G1248400
GO:0019439	aromatic compound catabolic process	79	1	0.04	8	0.038	0.575	1.000	Group_k	[5,7]	MD01G1235200
GO:0006468	protein phosphorylation	2060	5	2.04	1	0.042	0.457	0.042	Group_j	[4,5]	MD00G1124700;MD02G1047500;MD05G1351500;MD07G1219600;MD12G1147500
GO:0009607	response to biotic stimulus	62	3	0.09	1	0.0001	0.84	0.0001	Group_i	[3,4]	MD13G1160600;MD13G1160700;MD13G1161200
GO:0016567	protein ubiquitination	108	2	0.16	2	0.0110	0.16	0.0110	Group_i	[3,4]	MD13G1017300;MD14G1039900
GO:0006817	phosphate ion transport	13	1	0.02	5	0.0191	0.81	0.0191	Group_i	[3,4]	MD13G1213400
GO:0006032	chitin catabolic process	29	1	0.04	7	0.0422	0.73	0.0422	Group_i	[3,4]	MD02G1120200
GO:0006952	defense response	588	7	1.62	2	0.0010	0.52	0.00418	Group_h	[2,3]	MD02G1001300;MD04G1225400;MD07G1028000;MD07G1079300;MD13G1161100;MD16G1160300;MD16G1161100
GO:0050832	defense response to fungus	5	1	0.01	4	0.0137	0.94	0.01371	Group_h	[2,3]	MD04G1225400
GO:0042742	defense response to bacterium	8	1	0.02	6	0.0218	0.46	0.02184	Group_h	[2,3]	MD04G1225400
GO:0006633	fatty acid biosynthetic process	130	2	0.36	13	0.0498	0.34	0.04976	Group_h	[2,3]	MD07G1187400;MD07G1187800
GO:0006950	response to stress	1110	9	3.06	3	0.0027	0.46	0.64705	Group_h	[2,3]	MD02G1001300;MD04G1225400;MD07G1028000;MD07G1079300;MD11G1015300;MD12G1079300;MD13G1161100;MD16G1160300;MD16G1161100
GO:0048544	recognition of pollen	131	4	0.69	7	0.0051	0.776	0.0051	Group_g	[1,2]	MD05G1263100;MD05G1329600;MD09G1094800;MD10G1308000
GO:0006032	chitin catabolic process	29	2	0.15	9	0.0103	0.732	0.0103	Group_g	[1,2]	MD02G1120300;MD14G1173400
GO:0016255	attachment of GPI anchor to protein	3	1	0.02	17	0.0158	1.000	0.0158	Group_g	[1,2]	MD16G1223000
GO:0030001	metal ion transport	352	5	1.87	19	0.0388	0.776	0.1034	Group_g	[1,2]	MD01G1209000;MD02G1037900;MD09G1140300;MD11G1039300;MD16G1029900
GO:0006208	pyrimidine nucleobase catabolic process	1	1	0	1	0.0036	1.000	0.0036	Group_f	[0,1]	MD03G1164800
GO:0048544	recognition of pollen	131	3	0.47	6	0.0117	0.869	0.0117	Group_f	[0,1]	MD05G1334000;MD09G1095900;MD09G1096000
GO:0006573	valine metabolic process	4	1	0.01	9	0.0143	0.862	0.0143	Group_f	[0,1]	MD14G1237000
GO:0009435	NAD biosynthetic process	11	1	0.04	12	0.0390	0.886	0.0390	Group_f	[0,1]	MD05G1261800
GO:0046470	phosphatidylcholine metabolic process	14	1	0.05	14	0.0493	0.743	0.0493	Group_f	[0,1]	MD04G1069600
GO:0030001	metal ion transport	352	4	1.27	11	0.0377	0.655	0.1134	Group_f	[0,1]	MD01G1209100;MD01G1209200;MD07G1066200;MD15G1296400
GO:0006629	lipid metabolic process	737	6	2.66	13	0.0481	0.236	0.1431	Group_f	[0,1]	MD02G1126900;MD02G1168100;MD04G1069600;MD04G1234400;MD06G1050100;MD06G1103800
GO:0006102	isocitrate metabolic process	10	1	0.01	1	0.011	0.945	0.011	Group_e	[-1,0]	MD11G1266500
GO:0006259	DNA metabolic process	430	3	0.49	2	0.012	0.297	0.012	Group_e	[-1,0]	MD04G1043300;MD16G1217700;MD16G1217800
GO:0006546	glycine catabolic process	15	1	0.02	10	0.017	0.707	0.017	Group_e	[-1,0]	MD15G1416700
GO:0006801	superoxide metabolic process	22	1	0.02	13	0.025	0.833	0.025	Group_e	[-1,0]	MD03G1128900
GO:0008152	metabolic process	9542	15	10.79	9	0.016	0.715	0.321	Group_e	[-1,0]	MD01G1068500;MD03G1128900;MD04G1043300;MD07G1120700;MD07G1178200;MD10G1073700;MD11G1129900;MD11G1266500;MD11G1296600;MD15G1314700;MD15G1416700;MD16G1113800;MD16G1173100;MD16G1217700;MD16G1217800
GO:0019310	inositol catabolic process	6	1	0	1	0.0025	0.88	0.0025	Group_d	[-2,-1]	MD17G1179700
GO:0015693	magnesium ion transport	32	1	0.01	7	0.0135	0.52	0.0135	Group_d	[-2,-1]	MD16G1207000
GO:0009308	amine metabolic process	69	1	0.03	10	0.0289	0.52	0.0289	Group_d	[-2,-1]	MD16G1192100
GO:0006468	protein phosphorylation	2060	3	0.87	13	0.0437	0.43	0.0437	Group_d	[-2,-1]	MD13G1154700;MD14G1191300;MD17G1249300
GO:0006020	inositol metabolic process	7	1	0	5	0.0030	0.87	1.0000	Group_d	[-2,-1]	MD17G1179700
GO:0006066	alcohol metabolic process	79	1	0.03	11	0.0330	0.93	1.0000	Group_d	[-2,-1]	MD17G1179700
GO:0017148	negative regulation of translation	6	1	0	1	0.0017	0.64	0.0017	Group_c	[-3,-2]	MD00G1065500
GO:0016311	dephosphorylation	142	1	0.04	27	0.0395	0.10	0.0395	Group_c	[-3,-2]	MD09G1115100
GO:0006417	regulation of translation	17	1	0	10	0.0048	0.55	1.0000	Group_c	[-3,-2]	MD00G1065500
GO:0009889	regulation of biosynthetic process	57	1	0.02	20	0.0160	0.21	1.0000	Group_c	[-3,-2]	MD00G1065500
GO:0009890	negative regulation of biosynthetic proc...	8	1	0	5	0.0023	0.30	1.0000	Group_c	[-3,-2]	MD00G1065500
GO:0009892	negative regulation of metabolic process	32	1	0.01	17	0.0090	0.28	1.0000	Group_c	[-3,-2]	MD00G1065500
GO:0010468	regulation of gene expression	76	1	0.02	22	0.0213	0.13	1.0000	Group_c	[-3,-2]	MD00G1065500
GO:0010556	regulation of macromolecule biosynthetic...	55	1	0.02	19	0.0155	0.18	1.0000	Group_c	[-3,-2]	MD00G1065500
GO:0046856	phosphatidylinositol dephosphorylation	21	1	0	1	0.0015	0.635	0.0015	Group_b	[-3,-4]	MD06G1234000
GO:0006644	phospholipid metabolic process	150	1	0.01	8	0.0106	0.606	1.0000	Group_b	[-3,-4]	MD06G1234000
GO:0006650	glycerophospholipid metabolic process	125	1	0.01	5	0.0088	0.833	1.0000	Group_b	[-3,-4]	MD06G1234000
GO:0016311	dephosphorylation	142	1	0.01	7	0.0100	0.142	1.0000	Group_b	[-3,-4]	MD06G1234000
GO:0019637	organophosphate metabolic process	501	1	0.04	10	0.0354	0.633	1.0000	Group_b	[-3,-4]	MD06G1234000
GO:0030258	lipid modification	40	1	0	3	0.0028	0.118	1.0000	Group_b	[-3,-4]	MD06G1234000
GO:0044255	cellular lipid metabolic process	385	1	0.03	9	0.0272	0.098	1.0000	Group_b	[-3,-4]	MD06G1234000
GO:0046486	glycerolipid metabolic process	135	1	0.01	6	0.0095	0.554	1.0000	Group_b	[-3,-4]	MD06G1234000
GO:0046488	phosphatidylinositol metabolic process	101	1	0.01	4	0.0071	0.461	1.0000	Group_b	[-3,-4]	MD06G1234000
GO:0046839	phospholipid dephosphorylation	21	1	0	2	0.0015	0.635	1.0000	Group_b	[-3,-4]	MD06G1234000
GO:0006561	proline biosynthetic process	11	1	0	1	0.0039	0.49	0.0039	Group_a	[-4,-9]	MD12G1094100
GO:0006072	glycerol-3-phosphate metabolic process	13	1	0	2	0.0046	0.81	0.0046	Group_a	[-4,-9]	MD07G1170200
GO:0000272	polysaccharide catabolic process	29	1	0.01	5	0.0102	0.37	0.0102	Group_a	[-4,-9]	MD06G1044200
GO:0005975	carbohydrate metabolic process	1068	2	0.38	10	0.0488	0.96	0.2634	Group_a	[-4,-9]	MD06G1044200;MD10G1158000
GO:0006560	proline metabolic process	14	1	0	4	0.0049	0.40	1.0000	Group_a	[-4,-9]	MD12G1094100
GO:0009064	glutamine family amino acid metabolic pr...	58	1	0.02	7	0.0203	0.69	1.0000	Group_a	[-4,-9]	MD12G1094100
GO:0009084	glutamine family amino acid biosynthetic...	37	1	0.01	6	0.0130	0.85	1.0000	Group_a	[-4,-9]	MD12G1094100
